# Supplementary material
Source: PubMed Central journal article supplement (PMC5856466)
Supplement: NIHMS949078-supplement-Supplemental_Material.pdf [file NIHMS949078-supplement-Supplemental_Material.pdf]

## Supplemental Content

Supplement to:

### **Age at Exposure to Surgery and Anesthesia in Children and Association with Mental Disorder Diagnosis**

**List of Investigators:**

Caleb Ing, MD, MS

Ming Sun, MS

Mark Olfson, MD, MPH

Charles J. DiMaggio, PhD, MPH, PA-C

Lena S. Sun, MD

Melanie M. Wall, PhD

Guohua Li, MD, DrPH

## Table of Contents:

**Table 1:** ICD-9 Procedure Codes Identifying the Anesthetic and Surgical Exposure

**Table 2:** CPT-4 Codes Identifying the Anesthetic and Surgical Exposure

**Table 3:** ICD-9 Diagnosis Codes Identifying ICD-9 Coded Mental Disorder Diagnoses

**Supplemental Methods:** Details on Propensity Score Calculation and Matching Methods

**Table 4:** ICD-9 Diagnosis Codes for Prematurity and Congenital Anomaly Variables

**Table 5:** Characteristics of TX Pyloromyotomy Matched Cohorts by Age at Exposure

**Table 6:** Characteristics of TX Inguinal Hernia Matched Cohorts by Age at Exposure

**Table 7:** Characteristics of TX Circumcision Matched Cohorts by Age at Exposure

**Table 8:** Characteristics of TX Tonsillectomy and/or Adenoidectomy Matched Cohorts by Age at Exposure

**Table 9:** Characteristics of NY Pyloromyotomy Matched Cohorts by Age at Exposure

**Table 10:** Characteristics of NY Inguinal Hernia Matched Cohorts by Age at Exposure

**Table 11:** Characteristics of NY Circumcision Matched Cohorts by Age at Exposure

**Table 12:** Characteristics of NY Tonsillectomy and/or Adenoidectomy Matched Cohorts by Age at Exposure

**Table 13:** Standardized Differences for Covariates in TX Pyloromyotomy Matched Cohorts by Age at Exposure

**Table 14:** Standardized Differences for Covariates in TX Inguinal Hernia Matched Cohorts by Age at Exposure

**Table 15:** Standardized Differences for Covariates in TX Circumcision Matched Cohorts by Age at Exposure

**Table 16:** Standardized Differences for Covariates in TX Tonsillectomy and/or Adenoidectomy Matched Cohorts by Age at Exposure

**Table 17:** Standardized Differences for Covariates in NY Pyloromyotomy Matched Cohorts by Age at Exposure

**Table 18:** Standardized Differences for Covariates in NY Inguinal Hernia Matched Cohorts by Age at Exposure

**Table 19:** Standardized Differences for Covariates in NY Circumcision Matched Cohorts by Age at Exposure

**Table 20:** Standardized Differences for Covariates in NY Tonsillectomy and/or Adenoidectomy Matched Cohorts by Age at Exposure

*This supplemental material has been provided by the authors to give readers additional information about their work.*

**Table 1: ICD-9 Procedure Codes Identifying the Anesthetic and Surgical Exposure**

| <b>ICD-9 Codes</b> | <b>Description of Procedure</b>                                                                           |
|--------------------|-----------------------------------------------------------------------------------------------------------|
| 282                | Tonsillectomy without adenoidectomy                                                                       |
| 283                | Tonsillectomy with adenoidectomy                                                                          |
| 286                | Adenoidectomy without tonsillectomy                                                                       |
| 433                | Pyloromyotomy                                                                                             |
| 640                | Circumcision                                                                                              |
| 1711               | Laparoscopic repair of direct inguinal hernia with graft or prosthesis                                    |
| 1712               | Laparoscopic repair of indirect inguinal hernia with graft or prosthesis                                  |
| 1713               | Laparoscopic repair of inguinal hernia with graft or prosthesis, not otherwise specified                  |
| 1721               | Laparoscopic bilateral repair of direct inguinal hernia with graft or prosthesis                          |
| 1722               | Laparoscopic bilateral repair of indirect inguinal hernia with graft or prosthesis                        |
| 1723               | Laparoscopic bilateral repair of inguinal hernia, one direct and one indirect, with graft or prosthesis   |
| 1724               | Laparoscopic bilateral repair of inguinal hernia with graft or prosthesis, not otherwise specified        |
| 5300               | Unilateral repair of inguinal hernia, not otherwise specified                                             |
| 5301               | Other and open repair of direct inguinal hernia                                                           |
| 5302               | Other and open repair of indirect inguinal hernia                                                         |
| 5303               | Other and open repair of direct inguinal hernia with graft or prosthesis                                  |
| 5304               | Other and open repair of indirect inguinal hernia with graft or prosthesis                                |
| 5305               | Repair of inguinal hernia with graft or prosthesis, not otherwise specified                               |
| 5310               | Bilateral repair of inguinal hernia, not otherwise specified                                              |
| 5311               | Other and open bilateral repair of direct inguinal hernia                                                 |
| 5312               | Other and open bilateral repair of indirect inguinal hernia                                               |
| 5313               | Other and open bilateral repair of inguinal hernia, one direct and one indirect                           |
| 5314               | Other and open bilateral repair of direct inguinal hernia with graft or prosthesis                        |
| 5315               | Other and open bilateral repair of indirect inguinal hernia with graft or prosthesis                      |
| 5316               | Other and open bilateral repair of inguinal hernia, one direct and one indirect, with graft or prosthesis |
| 5317               | Bilateral inguinal hernia repair with graft or prosthesis, not otherwise specified                        |

**Table 2: CPT-4 Codes Identifying the Anesthetic and Surgical Exposure**

| <b>CPT-4 Codes</b> | <b>Description of Procedure</b>                                                                           |
|--------------------|-----------------------------------------------------------------------------------------------------------|
| 42820              | Tonsillectomy and adenoidectomy; younger than age 12                                                      |
| 42821              | Tonsillectomy and adenoidectomy; age 12 or over                                                           |
| 42825              | Tonsillectomy, primary or secondary; younger than age 12                                                  |
| 42826              | Tonsillectomy, primary or secondary; age 12 or over                                                       |
| 42830              | Adenoidectomy, primary; younger than age 12                                                               |
| 42831              | Adenoidectomy, primary; age 12 or over                                                                    |
| 42835              | Adenoidectomy, secondary; younger than age 12                                                             |
| 42836              | Adenoidectomy, secondary; age 12 or over                                                                  |
| 43520              | Pyloromyotomy, cutting of pyloric muscle                                                                  |
| 49491              | Repair, initial inguinal hernia, preterm infant; reducible                                                |
| 49492              | Repair, initial inguinal hernia, preterm infant; incarcerated or strangulated                             |
| 49495              | Repair, initial inguinal hernia, full term infant younger than age 6 months; reducible                    |
| 49496              | Repair, initial inguinal hernia, full term infant younger than age 6 months; incarcerated or strangulated |
| 49500              | Repair initial inguinal hernia, age 6 months to younger than 5 years; reducible                           |
| 49501              | Repair initial inguinal hernia, age 6 months to younger than 5 years; incarcerated or strangulated        |
| 49505              | Repair initial inguinal hernia, age 5 years or older; reducible                                           |
| 49507              | Repair initial inguinal hernia, age 5 years or older; incarcerated or strangulated                        |
| 49525              | Repair inguinal hernia, sliding, any age                                                                  |
| 49650              | Laparoscopy, surgical; repair initial inguinal hernia                                                     |
| 49651              | Laparoscopy, surgical; repair recurrent inguinal hernia                                                   |
| 54161              | Circumcision, surgical excision other than clamp, device, or dorsal slit                                  |

**Table 3: ICD-9 Diagnosis Codes Identifying ICD-9 Coded Mental Disorder Diagnoses**

| <b>ICD-9 Codes</b>                                                                      | <b>Description of Diagnosis</b>                               |
|-----------------------------------------------------------------------------------------|---------------------------------------------------------------|
| 295                                                                                     | Schizophrenia                                                 |
| 296.00–296.16, 296.4–296.89                                                             | Bipolar disorder                                              |
| 296.20– 296.35, 311                                                                     | Depression                                                    |
| 300.00–300.29                                                                           | Anxiety disorder                                              |
| 312.00–313.89                                                                           | Conduct disorder                                              |
| 299                                                                                     | Autism                                                        |
| 314                                                                                     | Attention deficit hyperactivity disorder                      |
| 317–319                                                                                 | Intellectual disability                                       |
| 315                                                                                     | Developmental delay                                           |
| <b><i>Composite variable of miscellaneous mental health diagnoses inclusive of:</i></b> |                                                               |
| 293-294                                                                                 | Mental disorders due to conditions classified elsewhere       |
| 297                                                                                     | Delusional disorders                                          |
| 298                                                                                     | Other nonorganic psychoses                                    |
| 300.10–300.19                                                                           | Dissociative and somatoform disorders                         |
| 300.30– 300.90                                                                          | Dissociative and somatoform disorders                         |
| 301.10–301.90                                                                           | Personality disorders                                         |
| 307                                                                                     | Special symptoms or syndromes not elsewhere classified        |
| 308                                                                                     | Acute reaction to stress                                      |
| 309                                                                                     | Adjustment reaction                                           |
| 313.90–313.99                                                                           | Disturbance of emotions specific to childhood and adolescence |

## **Supplemental Methods: Details on Propensity Score Calculation and Matching Methods**

### **Variables Used to Calculate Propensity Scores for Exposed Children:**

Propensity scores for each of the four individual procedures of interest were independently calculated for children in each age at exposure category, and were calculated separately for TX and NY. Any age at exposure category where a specific procedure was performed in fewer than 10 children was excluded from analysis. The variables used to calculate propensity scores were divided into two categories, those recorded at the time of birth and those recorded at the time of exposure.

Variables recorded at the time of birth: baseline sociodemographic characteristics (sex, race/ethnicity, income calculated by zip code of residence at birth and divided into quartiles<sup>1</sup>), and comorbidity variables including ICD-9 coded prematurity and congenital anomalies as binary variables (codes listed in Supplemental Content Table4).

Variables recorded at the time of exposure: comorbidity as described by Chronic Condition Indicator (CCI) coded binary variables, which classify ICD-9 codes into body systems with acute and chronic conditions for each system.<sup>2</sup> A particular CCI was recorded for a child if they had a diagnosis for that condition anytime at or prior to exposure. The number of inpatient stays and outpatient visits at the time of exposure were also coded as multilevel categorical variables. Inpatient stays were classified as the total number of stays, with all children having at least one stay since all had an inpatient stay for their own birth. The outpatient visits variable however was the number of outpatient visits split into quartiles.

Codes for medical conditions and visits directly related to the surgical procedure of interest were not used to evaluate comorbidity. For example, in a child needing circumcision for phimosis, the diagnosis of phimosis and the physician visits assessing phimosis prior to surgery were not used to calculate pre-existing comorbidity. Several specific CCI categories for disease types were also not used to assess comorbidity: “complications of pregnancy”, excluded because it referred to the mother and was only intermittently coded on the records of the child, “mental disorders”, because it was the outcome of interest, and “symptoms, signs, and ill-defined conditions” and “factors influencing health status and contact with health services” because these categories contained a mixture of heterogeneous and vague ICD-9 codes. Children who had procedures during the birth admission were also excluded due to a lack of data on patient comorbidity and inpatient and outpatient visits prior to the time of exposure.

### **Variables Used to Calculate Propensity Scores for Unexposed Children:**

In the unexposed children, the variables recorded at the time of birth were the same as those used in the exposed children. For the variables recorded at the time of exposure, the same variables were also used, however since these children were unexposed to surgery and anesthesia, the time at which these variables would be assessed needed to be determined. For the exposed children in each age at exposure category, the median age at exposure was calculated. This calculated age was then applied to the unexposed children in each age at exposure category to determine the age at which the CCI variables and number of physician visits were assessed.<sup>3</sup>

### **Calculation of Propensity Scores for Exposed and Unexposed Children and Propensity Score Matching:**

Fifty sociodemographic and clinical comorbidity variables were used to calculate propensity scores for the exposed and unexposed children. Using a logistic regression model, the predicted probability of each specific procedure in each age at exposure category was calculated. For example, for a child in TX, the predicted probability of pyloromyotomy in the >28 days and ≤6 months old age at exposure category was calculated with all children with pyloromyotomy in that age category as well as all eligible unexposed children in TX. Matching was then performed based on the propensity scores for children with pyloromyotomy in that age category and all available unexposed controls from that state (TX or NY). The propensity scores for every other procedure in each age at exposure category were similarly calculated with matching performed in a similar fashion.

**Table 4: ICD-9 Diagnosis Codes for Prematurity and Congenital Anomaly Variables**

| <b>ICD-9 Codes</b>             | <b>Description of Variable</b>                           |
|--------------------------------|----------------------------------------------------------|
| 765.21-765.28                  | <36 Weeks Gestational Age                                |
| 765.06-765.08, 765.16-765.18   | Low Birth Weight (<2500g and ≥1500g)                     |
| 765.04, 765.05, 765.14, 765.15 | Very Low Birth Weight (<1500g and ≥1000g)                |
| 765.01-765.03, 765.11-765.13   | Extremely Low Birth Weight (<1000g)                      |
| 758.0-758.9                    | Chromosomal Anomalies                                    |
| 745.0-747.9                    | Congenital Anomalies of the Heart and Circulatory System |
| 740.0 - 742.9                  | Congenital Anomalies of the Central Nervous System       |
| 743.0-744.9                    | Congenital Anomalies of the Eye                          |
| 752.0-752.9                    | Congenital Anomalies of the Genital Organs               |
| 749.0-751.9                    | Congenital Anomalies of the Digestive System             |
| 754.0-756.9                    | Congenital Musculoskeletal Deformities                   |
| 759.0-759.9                    | Other Congenital Anomalies                               |
| 748.0-748.9                    | Congenital Anomalies of the Respiratory System           |
| 757.0-757.9                    | Congenital Anomalies of the Skin                         |
| 753.0-753.9                    | Congenital Anomalies of the Urinary System               |
| 768.0-768.9                    | Intrauterine Hypoxia                                     |
| 760.70-760.79                  | Intrauterine Exposure to Noxious Agent                   |
| 762.0-762.9                    | Intrauterine Placental Insufficiency                     |

**Table 5: Characteristics of TX Pyloromyotomy Matched Cohorts by Age at Exposure**

|                                                          |            | >Birth - ≤28 days |                  | >28 days - ≤6 months |                  |
|----------------------------------------------------------|------------|-------------------|------------------|----------------------|------------------|
|                                                          |            | Exposure          |                  | Exposure             |                  |
|                                                          |            | No<br>n(%)        | Yes<br>n(%)      | No<br>n(%)           | Yes<br>n(%)      |
| Sex                                                      | Female     | 887 (17.5)        | 179 (17.7)       | 1329 (16.9)          | 281 (17.9)       |
|                                                          | Male       | 4178 (82.5)       | 834 (82.3)       | 6531 (83.1)          | 1291 (82.1)      |
| Race                                                     | White      | 955 (18.9)        | 194 (19.2)       | 1788 (22.8)          | 364 (23.2)       |
|                                                          | Black      | 308 (6.1)         | 60 (5.9)         | 420 (5.3)            | 73 (4.6)         |
|                                                          | Hispanic   | 3735 (73.7)       | 745 (73.5)       | 5467 (69.6)          | 1098 (69.9)      |
|                                                          | Other      | 67 (1.3)          | 14 (1.4)         | 185 (2.4)            | 37 (2.4)         |
| Income Based on ZIP Code of Residence (quartile)         | Quartile 1 | 1285 (25.4)       | 259 (25.6)       | 2202 (28)            | 436 (27.7)       |
|                                                          | Quartile 2 | 1508 (29.8)       | 299 (29.5)       | 1945 (24.8)          | 402 (25.6)       |
|                                                          | Quartile 3 | 1225 (24.2)       | 243 (24)         | 1936 (24.6)          | 379 (24.1)       |
|                                                          | Quartile 4 | 1047 (20.7)       | 212 (20.9)       | 1777 (22.6)          | 355 (22.6)       |
| Number of Outpatient Visits (quartile)                   | Quartile 1 | 1629 (32.2)       | 324 (32)         | 0 (0)                | 0 (0)            |
|                                                          | Quartile 2 | 1867 (36.9)       | 372 (36.7)       | 1244 (15.8)          | 241 (15.3)       |
|                                                          | Quartile 3 | 1000 (19.7)       | 205 (20.2)       | 1888 (24)            | 373 (23.7)       |
|                                                          | Quartile 4 | 569 (11.2)        | 112 (11.1)       | 4728 (60.2)          | 958 (60.9)       |
| Total Number of Inpatient Stays (n)                      | 0          | 0 (0)             | 0 (0)            | 0 (0)                | 0 (0)            |
|                                                          | 1          | 4946 (97.7)       | 985 (97.2)       | 7484 (95.2)          | 1490 (94.8)      |
|                                                          | 2          | 114 (2.3)         | 27 (2.7)         | 366 (4.7)            | 79 (5)           |
|                                                          | 3 or more  | ___ <sup>a</sup>  | ___ <sup>a</sup> | ___ <sup>a</sup>     | ___ <sup>a</sup> |
| <36 Weeks Gestational Age                                | No         | 4950 (97.7)       | 991 (97.8)       | 7440 (94.7)          | 1494 (95)        |
|                                                          | Yes        | 115 (2.3)         | 22 (2.2)         | 420 (5.3)            | 78 (5)           |
| Low Birth Weight (<2500g and ≥1500g)                     | No         | 4991 (98.5)       | 999 (98.6)       | 7593 (96.6)          | 1520 (96.7)      |
|                                                          | Yes        | 74 (1.5)          | 14 (1.4)         | 267 (3.4)            | 52 (3.3)         |
| Very Low Birth Weight (<1500g and ≥1000g)                | No         | 5063 (100)        | 1012 (99.9)      | 7850 (99.9)          | 1568 (99.8)      |
|                                                          | Yes        | ___ <sup>a</sup>  | ___ <sup>a</sup> | ___ <sup>a</sup>     | ___ <sup>a</sup> |
| Extremely Low Birth Weight (<1000g)                      | No         | 5065 (100)        | 1013 (100)       | 7856 (100)           | 1571 (99.9)      |
|                                                          | Yes        | 0 (0)             | 0 (0)            | ___ <sup>a</sup>     | ___ <sup>a</sup> |
| Chromosomal Anomalies                                    | No         | 5062 (99.9)       | 1012 (99.9)      | 7860 (100)           | 1572 (100)       |
|                                                          | Yes        | ___ <sup>a</sup>  | ___ <sup>a</sup> | 0 (0)                | 0 (0)            |
| Congenital Anomalies of the Heart and Circulatory System | No         | 4913 (97)         | 982 (96.9)       | 7565 (96.3)          | 1513 (96.3)      |
|                                                          | Yes        | 152 (3)           | 31 (3.1)         | 295 (3.8)            | 59 (3.8)         |
| Congenital Anomalies of the Central Nervous System       | No         | 5062 (99.9)       | 1011 (99.8)      | 7833 (99.7)          | 1564 (99.5)      |
|                                                          | Yes        | ___ <sup>a</sup>  | ___ <sup>a</sup> | 27 (0.3)             | ___ <sup>a</sup> |
| Congenital Anomalies of the Eye                          | No         | 5014 (99)         | 1003 (99)        | 7844 (99.8)          | 1568 (99.8)      |
|                                                          | Yes        | 51 (1)            | ___ <sup>a</sup> | 16 (0.2)             | ___ <sup>a</sup> |
| Congenital Anomalies of the Genital Organs               | No         | 5031 (99.3)       | 1005 (99.2)      | 7795 (99.2)          | 1563 (99.4)      |
|                                                          | Yes        | 34 (0.7)          | ___ <sup>a</sup> | 65 (0.8)             | ___ <sup>a</sup> |
| Congenital Anomalies of the Digestive System             | No         | 5055 (99.8)       | 1010 (99.7)      | 7836 (99.7)          | 1567 (99.7)      |
|                                                          | Yes        | 10 (0.2)          | ___ <sup>a</sup> | 24 (0.3)             | ___ <sup>a</sup> |
| Congenital Musculoskeletal Deformities                   | No         | 4983 (98.4)       | 996 (98.3)       | 7808 (99.3)          | 1561 (99.3)      |
|                                                          | Yes        | 82 (1.6)          | 17 (1.7)         | 52 (0.7)             | 11 (0.7)         |
| Other Congenital Anomalies                               | No         | 5052 (99.7)       | 1009 (99.6)      | 7850 (99.9)          | 1570 (99.9)      |
|                                                          | Yes        | 13 (0.3)          | ___ <sup>a</sup> | ___ <sup>a</sup>     | ___ <sup>a</sup> |
| Congenital Anomalies of the Respiratory System           | No         | 5046 (99.6)       | 1009 (99.6)      | 7848 (99.9)          | 1568 (99.8)      |
|                                                          | Yes        | 19 (0.4)          | ___ <sup>a</sup> | 12 (0.2)             | ___ <sup>a</sup> |
| Congenital Anomalies of the Skin                         | No         | 5033 (99.4)       | 1006 (99.3)      | 7819 (99.5)          | 1564 (99.5)      |
|                                                          | Yes        | 32 (0.6)          | ___ <sup>a</sup> | 41 (0.5)             | ___ <sup>a</sup> |
| Congenital Anomalies of the Urinary System               | No         | 5046 (99.6)       | 1009 (99.6)      | 7832 (99.6)          | 1568 (99.8)      |
|                                                          | Yes        | 19 (0.4)          | ___ <sup>a</sup> | 28 (0.4)             | ___ <sup>a</sup> |
| Intrauterine Hypoxia                                     | No         | 4996 (98.6)       | 999 (98.6)       | 7761 (98.7)          | 1551 (98.7)      |
|                                                          | Yes        | 69 (1.4)          | 14 (1.4)         | 99 (1.3)             | 21 (1.3)         |
| Intrauterine Exposure to Noxious Agent                   | No         | 5031 (99.3)       | 1009 (99.6)      | 7798 (99.2)          | 1558 (99.1)      |
|                                                          | Yes        | 34 (0.7)          | ___ <sup>a</sup> | 62 (0.8)             | 14 (0.9)         |



|                                                                  |     |                  |                  |                  |                  |
|------------------------------------------------------------------|-----|------------------|------------------|------------------|------------------|
| Intrauterine Placental Insufficiency                             | No  | 5024 (99.2)      | 1002 (98.9)      | 7765 (98.8)      | 1549 (98.5)      |
|                                                                  | Yes | 41 (0.8)         | 11 (1.1)         | 95 (1.2)         | 23 (1.5)         |
| Infectious Disease (Acute)                                       | No  | 4826 (95.3)      | 964 (95.2)       | 6992 (89)        | 1396 (88.8)      |
|                                                                  | Yes | 239 (4.7)        | 49 (4.8)         | 868 (11)         | 176 (11.2)       |
| Neoplasm (Acute)                                                 | No  | 5058 (99.9)      | 1012 (99.9)      | 7827 (99.6)      | 1566 (99.6)      |
|                                                                  | Yes | ___ <sup>a</sup> | ___ <sup>a</sup> | 33 (0.4)         | ___ <sup>a</sup> |
| Endocrine, metabolic, and immunity disorders (Acute)             | No  | 5054 (99.8)      | 1011 (99.8)      | 7733 (98.4)      | 1540 (98)        |
|                                                                  | Yes | 11 (0.2)         | ___ <sup>a</sup> | 127 (1.6)        | 32 (2)           |
| Diseases of blood and blood-forming organs (Acute)               | No  | 5041 (99.5)      | 1010 (99.7)      | 7815 (99.4)      | 1559 (99.2)      |
|                                                                  | Yes | 24 (0.5)         | ___ <sup>a</sup> | 45 (0.6)         | 13 (0.8)         |
| Diseases of the nervous system and sense organs (Acute)          | No  | 4912 (97)        | 982 (96.9)       | 7418 (94.4)      | 1477 (94)        |
|                                                                  | Yes | 153 (3)          | 31 (3.1)         | 442 (5.6)        | 95 (6)           |
| Diseases of the circulatory system (Acute)                       | No  | 5051 (99.7)      | 1010 (99.7)      | 7805 (99.3)      | 1562 (99.4)      |
|                                                                  | Yes | 14 (0.3)         | ___ <sup>a</sup> | 55 (0.7)         | ___ <sup>a</sup> |
| Diseases of the respiratory system (Acute)                       | No  | 4632 (91.5)      | 923 (91.1)       | 6279 (79.9)      | 1237 (78.7)      |
|                                                                  | Yes | 433 (8.6)        | 90 (8.9)         | 1581 (20.1)      | 335 (21.3)       |
| Diseases of the digestive system (Acute)                         | No  | 4702 (92.8)      | 943 (93.1)       | 6562 (83.5)      | 1314 (83.6)      |
|                                                                  | Yes | 363 (7.2)        | 70 (6.9)         | 1298 (16.5)      | 258 (16.4)       |
| Diseases of the genitourinary system (Acute)                     | No  | 4630 (91.4)      | 928 (91.6)       | 7018 (89.3)      | 1400 (89.1)      |
|                                                                  | Yes | 435 (8.6)        | 85 (8.4)         | 842 (10.7)       | 172 (10.9)       |
| Diseases of the skin and subcutaneous tissue (Acute)             | No  | 4898 (96.7)      | 978 (96.5)       | 7247 (92.2)      | 1441 (91.7)      |
|                                                                  | Yes | 167 (3.3)        | 35 (3.5)         | 613 (7.8)        | 131 (8.3)        |
| Diseases of the musculoskeletal system (Acute)                   | No  | 5031 (99.3)      | 1005 (99.2)      | 7820 (99.5)      | 1565 (99.6)      |
|                                                                  | Yes | 34 (0.7)         | ___ <sup>a</sup> | 40 (0.5)         | ___ <sup>a</sup> |
| Congenital anomalies                                             | No  | 4696 (92.7)      | 934 (92.2)       | 7306 (93)        | 1462 (93)        |
|                                                                  | Yes | 369 (7.3)        | 79 (7.8)         | 554 (7.1)        | 110 (7)          |
| Certain conditions originating in the perinatal period (Acute)   | No  | 2522 (49.8)      | 501 (49.5)       | 3627 (46.2)      | 728 (46.3)       |
|                                                                  | Yes | 2543 (50.2)      | 512 (50.5)       | 4233 (53.9)      | 844 (53.7)       |
| Injury and poisoning (Acute)                                     | No  | 4984 (98.4)      | 996 (98.3)       | 7713 (98.1)      | 1539 (97.9)      |
|                                                                  | Yes | 81 (1.6)         | 17 (1.7)         | 147 (1.9)        | 33 (2.1)         |
| Infectious Disease (Chronic)                                     | No  | 5065 (100)       | 1013 (100)       | 7860 (100)       | 1572 (100)       |
|                                                                  | Yes | 0 (0)            | 0 (0)            | 0 (0)            | 0 (0)            |
| Neoplasm (Chronic)                                               | No  | 5065 (100)       | 1013 (100)       | 7856 (100)       | 1571 (99.9)      |
|                                                                  | Yes | 0 (0)            | 0 (0)            | ___ <sup>a</sup> | ___ <sup>a</sup> |
| Endocrine, metabolic, and immunity disorders (Chronic)           | No  | 4941 (97.6)      | 989 (97.6)       | 7674 (97.6)      | 1531 (97.4)      |
|                                                                  | Yes | 124 (2.5)        | 24 (2.4)         | 186 (2.4)        | 41 (2.6)         |
| Diseases of blood and blood-forming organs (Chronic)             | No  | 5042 (99.6)      | 1008 (99.5)      | 7813 (99.4)      | 1562 (99.4)      |
|                                                                  | Yes | 23 (0.5)         | ___ <sup>a</sup> | 47 (0.6)         | ___ <sup>a</sup> |
| Diseases of the nervous system and sense organs (Chronic)        | No  | 5037 (99.5)      | 1006 (99.3)      | 7726 (98.3)      | 1545 (98.3)      |
|                                                                  | Yes | 28 (0.6)         | ___ <sup>a</sup> | 134 (1.7)        | 27 (1.7)         |
| Diseases of the circulatory system (Chronic)                     | No  | 5041 (99.5)      | 1007 (99.4)      | 7799 (99.2)      | 1556 (99)        |
|                                                                  | Yes | 24 (0.5)         | ___ <sup>a</sup> | 61 (0.8)         | 16 (1)           |
| Diseases of the respiratory system (Chronic)                     | No  | 5017 (99.1)      | 1002 (98.9)      | 7635 (97.1)      | 1526 (97.1)      |
|                                                                  | Yes | 48 (1)           | 11 (1.1)         | 225 (2.9)        | 46 (2.9)         |
| Diseases of the digestive system (Chronic)                       | No  | 4541 (89.7)      | 906 (89.4)       | 6209 (79)        | 1241 (78.9)      |
|                                                                  | Yes | 524 (10.4)       | 107 (10.6)       | 1651 (21)        | 331 (21.1)       |
| Diseases of the genitourinary system (Chronic)                   | No  | 5059 (99.9)      | 1012 (99.9)      | 7831 (99.6)      | 1565 (99.6)      |
|                                                                  | Yes | ___ <sup>a</sup> | ___ <sup>a</sup> | 29 (0.4)         | ___ <sup>a</sup> |
| Diseases of the skin and subcutaneous tissue (Chronic)           | No  | 5063 (100)       | 1012 (99.9)      | 7799 (99.2)      | 1556 (99)        |
|                                                                  | Yes | ___ <sup>a</sup> | ___ <sup>a</sup> | 61 (0.8)         | 16 (1)           |
| Diseases of the musculoskeletal system (Chronic)                 | No  | 5062 (99.9)      | 1012 (99.9)      | 7860 (100)       | 1572 (100)       |
|                                                                  | Yes | ___ <sup>a</sup> | ___ <sup>a</sup> | 0 (0)            | 0 (0)            |
| Certain conditions originating in the perinatal period (Chronic) | No  | 5046 (99.6)      | 1011 (99.8)      | 7820 (99.5)      | 1563 (99.4)      |
|                                                                  | Yes | 19 (0.4)         | ___ <sup>a</sup> | 40 (0.5)         | ___ <sup>a</sup> |
| Injury and poisoning (Chronic)                                   | No  | 5065 (100)       | 1013 (100)       | 7860 (100)       | 1572 (100)       |
|                                                                  | Yes | 0 (0)            | 0 (0)            | 0 (0)            | 0 (0)            |

<sup>a</sup>These data are not presented as the report of data for any subgroup with 10 or fewer subjects is prohibited by the Centers for Medicare & Medicaid Services data use agreement.

**Table 6: Characteristics of TX Inguinal Hernia Matched Cohorts by Age at Exposure**

|                                                          |            | >Birth - ≤28 days |                  | >28 days - ≤6 months |                  | >6 months - ≤1 yr |                  | >1 yr - ≤1.5 yrs |                  | >1.5 yrs - ≤2 yrs |                  | >2 yrs - ≤2.5 yrs |                  | >2.5 yrs - ≤3 yrs |                  | >3 yrs - ≤3.5 yrs |                  | >3.5 yrs - ≤4 yrs |                  | >4 yrs - ≤4.5 yrs |                  | >4.5 yrs - ≤5 yrs |                  |
|----------------------------------------------------------|------------|-------------------|------------------|----------------------|------------------|-------------------|------------------|------------------|------------------|-------------------|------------------|-------------------|------------------|-------------------|------------------|-------------------|------------------|-------------------|------------------|-------------------|------------------|-------------------|------------------|
|                                                          |            | Exposure          |                  | Exposure             |                  | Exposure          |                  | Exposure         |                  | Exposure          |                  | Exposure          |                  | Exposure          |                  | Exposure          |                  | Exposure          |                  | Exposure          |                  | Exposure          |                  |
|                                                          |            | No<br>n(%)        | Yes<br>n(%)      | No<br>n(%)           | Yes<br>n(%)      | No<br>n(%)        | Yes<br>n(%)      | No<br>n(%)       | Yes<br>n(%)      | No<br>n(%)        | Yes<br>n(%)      | No<br>n(%)        | Yes<br>n(%)      | No<br>n(%)        | Yes<br>n(%)      | No<br>n(%)        | Yes<br>n(%)      | No<br>n(%)        | Yes<br>n(%)      | No<br>n(%)        | Yes<br>n(%)      | No<br>n(%)        | Yes<br>n(%)      |
| Sex                                                      | Female     | 28 (25.5)         | ___ <sup>a</sup> | 902 (15.9)           | 190 (16.7)       | 297 (14.7)        | 59 (14.6)        | 165 (10.7)       | 31 (10)          | 62 (6.6)          | 15 (8)           | 94 (16.9)         | 16 (14.4)        | 84 (26.7)         | 15 (23.8)        | 132 (27.8)        | 24 (25.3)        | 87 (32.8)         | 15 (28.3)        | 126 (49.4)        | 24 (47.1)        | 69 (32.9)         | 13 (31)          |
|                                                          | Male       | 82 (74.6)         | 18 (81.8)        | 4783 (84.1)          | 947 (83.3)       | 1728 (85.3)       | 346 (85.4)       | 1380 (89.3)      | 278 (90)         | 873 (93.4)        | 172 (92)         | 461 (83.1)        | 95 (85.6)        | 231 (73.3)        | 48 (76.2)        | 343 (72.2)        | 71 (74.7)        | 178 (67.2)        | 38 (71.7)        | 129 (50.6)        | 27 (52.9)        | 141 (67.1)        | 29 (69.1)        |
| Race                                                     | White      | 20 (18.2)         | ___ <sup>a</sup> | 1497 (26.3)          | 308 (27.1)       | 529 (26.1)        | 102 (25.2)       | 477 (30.9)       | 87 (28.2)        | 268 (28.7)        | 50 (26.7)        | 170 (30.6)        | 34 (30.6)        | 84 (26.7)         | 16 (25.4)        | 95 (20)           | 16 (16.8)        | 57 (21.5)         | ___ <sup>a</sup> | 29 (11.4)         | ___ <sup>a</sup> | 14 (6.7)          | ___ <sup>a</sup> |
|                                                          | Black      | 57 (51.8)         | ___ <sup>a</sup> | 1284 (22.6)          | 238 (20.9)       | 569 (28.1)        | 99 (24.4)        | 329 (21.3)       | 72 (23.3)        | 221 (23.6)        | 41 (21.9)        | 80 (14.4)         | 16 (14.4)        | 28 (8.9)          | ___ <sup>a</sup> | 40 (8.4)          | 10 (10.5)        | 39 (14.7)         | 8 (15.1)         | 30 (11.8)         | ___ <sup>a</sup> | 50 (23.8)         | ___ <sup>a</sup> |
|                                                          | Hispanic   | 33 (30)           | ___ <sup>a</sup> | 2711 (47.7)          | 550 (48.4)       | 866 (42.8)        | 187 (46.2)       | 659 (42.7)       | 131 (42.4)       | 416 (44.5)        | 89 (47.6)        | 267 (48.1)        | 54 (48.7)        | 197 (62.5)        | 38 (60.3)        | 334 (70.3)        | 68 (71.6)        | 166 (62.6)        | 34 (64.2)        | 188 (73.7)        | 37 (72.6)        | 146 (69.5)        | 29 (69.1)        |
|                                                          | Other      | 0 (0)             | 0 (0)            | 193 (3.4)            | 41 (3.6)         | 61 (3)            | 17 (4.2)         | 80 (5.2)         | 19 (6.2)         | 30 (3.2)          | ___ <sup>a</sup> | 38 (6.9)          | ___ <sup>a</sup> | ___ <sup>a</sup>  | 0 (0)            |
| Income Based on ZIP Code of Residence (quartile)         | Quartile 1 | 29 (26.4)         | ___ <sup>a</sup> | 1338 (23.5)          | 271 (23.8)       | 416 (20.5)        | 82 (20.3)        | 335 (21.7)       | 67 (21.7)        | 192 (20.5)        | 43 (23)          | 157 (28.3)        | 27 (24.3)        | 115 (36.5)        | 22 (34.9)        | 133 (28)          | 27 (28.4)        | 50 (18.9)         | 13 (24.5)        | 75 (29.4)         | 15 (29.4)        | 76 (36.2)         | 15 (35.7)        |
|                                                          | Quartile 2 | 31 (28.2)         | ___ <sup>a</sup> | 1379 (24.3)          | 280 (24.6)       | 518 (25.6)        | 99 (24.4)        | 322 (20.8)       | 68 (22)          | 245 (26.2)        | 54 (28.9)        | 113 (20.4)        | 26 (23.4)        | 54 (17.1)         | 12 (19.1)        | 159 (33.5)        | 31 (32.6)        | 62 (23.4)         | 16 (30.2)        | 64 (25.1)         | 13 (25.5)        | 51 (24.3)         | 12 (28.6)        |
|                                                          | Quartile 3 | 32 (29.1)         | ___ <sup>a</sup> | 1477 (26)            | 295 (26)         | 575 (28.4)        | 117 (28.9)       | 540 (35)         | 94 (30.4)        | 222 (23.7)        | 40 (21.4)        | 137 (24.7)        | 27 (24.3)        | 102 (32.4)        | 19 (30.2)        | 114 (24.4)        | 25 (26.3)        | 85 (32.1)         | 13 (24.5)        | 59 (23.1)         | 13 (25.5)        | 35 (16.7)         | ___ <sup>a</sup> |
|                                                          | Quartile 4 | 18 (16.4)         | ___ <sup>a</sup> | 1491 (26.2)          | 291 (25.6)       | 516 (25.5)        | 107 (26.4)       | 348 (22.5)       | 80 (25.9)        | 276 (29.5)        | 50 (26.7)        | 148 (26.7)        | 31 (27.9)        | 44 (14)           | ___ <sup>a</sup> | 69 (14.5)         | 12 (12.6)        | 68 (25.7)         | 11 (20.8)        | 57 (22.4)         | 10 (19.6)        | 48 (22.9)         | ___ <sup>a</sup> |
| Number of Outpatient Visits (quartile)                   | Quartile 1 | 44 (40)           | ___ <sup>a</sup> | 593 (10.4)           | 107 (9.4)        | 228 (11.3)        | 48 (11.9)        | 130 (8.4)        | 26 (8.4)         | 57 (6.1)          | 12 (6.4)         | 98 (17.7)         | 17 (15.3)        | 22 (7)            | ___ <sup>a</sup> | 59 (12.4)         | 13 (13.7)        | 67 (17.4)         | ___ <sup>a</sup> | 18 (7.1)          | ___ <sup>a</sup> | 26 (12.4)         | ___ <sup>a</sup> |
|                                                          | Quartile 2 | 29 (26.4)         | ___ <sup>a</sup> | 772 (13.6)           | 153 (13.5)       | 357 (17.6)        | 76 (18.8)        | 492 (31.8)       | 96 (31.1)        | 228 (24.4)        | 48 (25.7)        | 182 (32.8)        | 32 (28.8)        | 96 (30.5)         | 20 (31.8)        | 88 (18.5)         | 18 (19)          | 40 (15.1)         | ___ <sup>a</sup> | 54 (21.2)         | 16 (31.4)        | 33 (15.7)         | ___ <sup>a</sup> |
|                                                          | Quartile 3 | 18 (16.4)         | ___ <sup>a</sup> | 2014 (35.4)          | 398 (35)         | 516 (25.5)        | 101 (24.9)       | 372 (24.1)       | 73 (23.6)        | 282 (30.2)        | 47 (25.1)        | 108 (19.5)        | 27 (24.3)        | 69 (21.9)         | 14 (22.2)        | 129 (27.2)        | 28 (29.5)        | 64 (24.2)         | 15 (28.3)        | 74 (29)           | 14 (27.5)        | 76 (36.2)         | 13 (31)          |
|                                                          | Quartile 4 | 19 (17.3)         | ___ <sup>a</sup> | 2306 (40.6)          | 479 (42.1)       | 924 (45.6)        | 180 (44.4)       | 551 (35.7)       | 114 (36.9)       | 368 (39.4)        | 80 (42.8)        | 167 (30.1)        | 35 (31.5)        | 128 (40.6)        | 24 (38.1)        | 199 (41.9)        | 36 (37.9)        | 115 (43.4)        | 24 (45.3)        | 109 (42.8)        | 18 (35.3)        | 75 (35.7)         | 14 (33.3)        |
| Total Number of Inpatient Stays (n)                      | 0          | 0 (0)             | 0 (0)            | 0 (0)                | 0 (0)            | 0 (0)             | 0 (0)            | 0 (0)            | 0 (0)            | 0 (0)             | 0 (0)            | 0 (0)             | 0 (0)            | 0 (0)             | 0 (0)            | 0 (0)             | 0 (0)            | 0 (0)             | 0 (0)            | 0 (0)             | 0 (0)            | 0 (0)             | 0 (0)            |
|                                                          | 1          | 110 (100)         | 22 (100)         | 4944 (87)            | 984 (86.5)       | 1606 (79.3)       | 321 (79.3)       | 1187 (76.8)      | 242 (78.3)       | 729 (78)          | 138 (73.8)       | 397 (71.5)        | 81 (73)          | 253 (80.3)        | 49 (77.8)        | 375 (79)          | 73 (76.8)        | 206 (77.7)        | 39 (73.6)        | 198 (77.7)        | 39 (76.5)        | 158 (75.2)        | 31 (73.8)        |
|                                                          | 2          | 0 (0)             | 0 (0)            | 655 (11.5)           | 133 (11.7)       | 327 (16.2)        | 65 (16.1)        | 268 (17.4)       | 48 (15.5)        | 135 (14.4)        | 32 (17.1)        | 147 (26.5)        | 27 (24.3)        | 47 (14.9)         | 11 (17.5)        | 68 (14.3)         | 15 (15.8)        | 15 (5.7)          | ___ <sup>a</sup> | 35 (13.7)         | ___ <sup>a</sup> | 39 (18.6)         | ___ <sup>a</sup> |
|                                                          | 3 or more  | 0 (0)             | 0 (0)            | 86 (1.5)             | 20 (1.8)         | 92 (4.5)          | 19 (4.7)         | 90 (5.8)         | 19 (6.2)         | 71 (7.6)          | 17 (9.1)         | 11 (2)            | ___ <sup>a</sup> | 15 (4.8)          | ___ <sup>a</sup> | 32 (6.7)          | ___ <sup>a</sup> | 44 (16.6)         | ___ <sup>a</sup> | 22 (8.6)          | ___ <sup>a</sup> | 13 (6.2)          | ___ <sup>a</sup> |
| <36 Weeks Gestational Age                                | No         | 96 (87.3)         | 19 (86.4)        | 4260 (74.9)          | 856 (75.3)       | 1646 (81.3)       | 330 (81.5)       | 1390 (90)        | 276 (89.3)       | 843 (90.2)        | 166 (88.8)       | 513 (92.4)        | 104 (93.7)       | 304 (96.5)        | 60 (95.2)        | 440 (92.6)        | 88 (92.6)        | 245 (92.5)        | 49 (92.5)        | 242 (94.9)        | 48 (94.1)        | 194 (92.4)        | 38 (90.5)        |
|                                                          | Yes        | 14 (12.7)         | ___ <sup>a</sup> | 1425 (25.1)          | 281 (24.7)       | 379 (18.7)        | 75 (18.5)        | 155 (10)         | 33 (10.7)        | 92 (9.8)          | 21 (11.2)        | 42 (7.6)          | ___ <sup>a</sup> | 11 (3.5)          | ___ <sup>a</sup> | 35 (7.4)          | ___ <sup>a</sup> | 20 (7.6)          | ___ <sup>a</sup> | 13 (5.1)          | ___ <sup>a</sup> | 16 (7.6)          | ___ <sup>a</sup> |
| Low Birth Weight (<2500g and ≥1500g)                     | No         | 106 (96.4)        | 21 (95.5)        | 4523 (79.6)          | 918 (80.7)       | 1723 (85.1)       | 353 (87.2)       | 1415 (91.6)      | 281 (90.9)       | 860 (92)          | 172 (92)         | 503 (90.6)        | 103 (92.8)       | 301 (95.6)        | 60 (95.2)        | 444 (93.5)        | 89 (93.7)        | 232 (87.6)        | 48 (90.6)        | 237 (92.9)        | 47 (92.2)        | 200 (95.2)        | 39 (92.9)        |
|                                                          | Yes        | ___ <sup>a</sup>  | ___ <sup>a</sup> | 1162 (20.4)          | 219 (19.3)       | 302 (14.9)        | 52 (12.8)        | 130 (8.4)        | 28 (9.1)         | 75 (8)            | 15 (8)           | 52 (9.4)          | 14 (4.4)         | ___ <sup>a</sup>  | ___ <sup>a</sup> | 31 (6.5)          | ___ <sup>a</sup> | 33 (12.5)         | ___ <sup>a</sup> | 18 (7.1)          | ___ <sup>a</sup> | ___ <sup>a</sup>  | ___ <sup>a</sup> |
| Very Low Birth Weight (<1500g and ≥1000g)                | No         | 110 (100)         | 22 (100)         | 5126 (90.2)          | 1020 (89.7)      | 1870 (92.4)       | 371 (91.6)       | 1491 (96.5)      | 298 (96.4)       | 915 (97.9)        | 183 (97.9)       | 539 (97.1)        | 107 (96.4)       | 315 (100)         | 63 (100)         | 472 (99.4)        | 94 (99)          | 265 (100)         | 53 (100)         | 255 (100)         | 51 (100)         | 210 (100)         | 42 (100)         |
|                                                          | Yes        | 0 (0)             | 0 (0)            | 559 (9.8)            | 117 (10.3)       | 155 (7.7)         | 34 (8.4)         | 54 (3.5)         | 11 (3.6)         | 20 (2.1)          | ___ <sup>a</sup> | 16 (2.9)          | ___ <sup>a</sup> | 0 (0)             | 0 (0)            | 3 (0.6)           | ___ <sup>a</sup> | 0 (0)             | 0 (0)            | 0 (0)             | 0 (0)            | 0 (0)             | 0 (0)            |
| Extremely Low Birth Weight (<1000g)                      | No         | 100 (90.9)        | 21 (95.5)        | 5495 (96.7)          | 1085 (95.4)      | 1909 (94.3)       | 376 (92.8)       | 1492 (96.6)      | 297 (96.1)       | 929 (99.4)        | 186 (99.5)       | 555 (100)         | 111 (100)        | 315 (100)         | 63 (100)         | 475 (100)         | 95 (100)         | 263 (99.3)        | 52 (98.1)        | 255 (100)         | 51 (100)         | 210 (100)         | 42 (100)         |
|                                                          | Yes        | ___ <sup>a</sup>  | ___ <sup>a</sup> | 190 (3.3)            | 52 (4.6)         | 116 (5.7)         | 29 (7.2)         | 53 (3.4)         | 12 (3.9)         | ___ <sup>a</sup>  | ___ <sup>a</sup> | 0 (0)             | 0 (0)            | 0 (0)             | 0 (0)            | 0 (0)             | 0 (0)            | ___ <sup>a</sup>  | ___ <sup>a</sup> | 0 (0)             | 0 (0)            | 0 (0)             | 0 (0)            |
| Chromosomal Anomalies                                    | No         | 110 (100)         | 22 (100)         | 5680 (99.9)          | 1136 (99.9)      | 2025 (100)        | 405 (100)        | 1545 (100)       | 309 (100)        | 935 (100)         | 187 (100)        | 555 (100)         | 111 (100)        | 315 (100)         | 63 (100)         | 475 (100)         | 95 (100)         | 265 (100)         | 53 (100)         | 255 (100)         | 51 (100)         | 210 (100)         | 42 (100)         |
|                                                          | Yes        | 0 (0)             | 0 (0)            | ___ <sup>a</sup>     | ___ <sup>a</sup> | 0 (0)             | 0 (0)            | 0 (0)            | 0 (0)            | 0 (0)             | 0 (0)            | 0 (0)             | 0 (0)            | 0 (0)             | 0 (0)            | 0 (0)             | 0 (0)            | 0 (0)             | 0 (0)            | 0 (0)             | 0 (0)            | 0 (0)             | 0 (0)            |
| Congenital Anomalies of the Heart and Circulatory System | No         | 110 (100)         | 22 (100)         | 5138 (90.4)          | 1018 (89.5)      | 1815 (89.6)       | 357 (88.2)       | 1455 (94.2)      | 287 (92.9)       | 886 (94.8)        | 173 (92.5)       | 517 (93.2)        | 104 (93.7)       | 299 (94.9)        | 61 (96.8)        | 457 (96.2)        | 91 (95.8)        | 241 (90.9)        | 47 (88.7)        | 246 (96.5)        | 48 (94.1)        | 201 (95.7)        | 40 (95.2)        |
|                                                          | Yes        | 0 (0)             | 0 (0)            | 547 (9.6)            | 119 (10.5)       | 210 (10.4)        | 48 (11.9)        | 90 (5.8)         | 22 (7.1)         | 49 (5.2)          | 14 (7.5)         | 38 (6.9)          | ___ <sup>a</sup> | 16 (5.1)          | ___ <sup>a</sup> | 18 (3.8)          | ___ <sup>a</sup> | 24 (9.1)          | ___ <sup>a</sup> | ___ <sup>a</sup>  | ___ <sup>a</sup> | ___ <sup>a</sup>  | ___ <sup>a</sup> |
| Congenital Anomalies of the Central Nervous System       | No         | 110 (100)         | 22 (100)         | 5566 (97.9)          | 1112 (97.8)      | 1997 (98.6)       | 399 (98.5)       | 1544 (99.9)      | 308 (99.7)       | 924 (98.8)        | 183 (97.9)       | 555 (100)         | 111 (100)        | 315 (100)         | 63 (100)         | 475 (100)         | 95 (100)         | 265 (100)         | 53 (100)         | 255 (100)         | 51 (100)         | 210 (100)         | 42 (100)         |
|                                                          | Yes        | 0 (0)             | 0 (0)            | 119 (2.1)            | 25 (2.2)         | 28 (1.4)          | ___ <sup>a</sup> | ___ <sup>a</sup> | ___ <sup>a</sup> | 11 (1.2)          | ___ <sup>a</sup> | 0 (0)             | 0 (0)            | 0 (0)             | 0 (0)            | 0 (0)             | 0 (0)            | 0 (0)             | 0 (0)            | 0 (0)             | 0 (0)            | 0 (0)             | 0 (0)            |
| Congenital Anomalies of the Eye                          | No         | 110 (100)         | 22 (100)         | 5644 (99.3)          | 1126 (99)        | 1987 (98.1)       | 400 (98.8)       | 1535 (99.4)      | 307 (99.4)       | 926 (99)          | 185 (98.9)       | 555 (100)         | 111 (100)        | 315 (100)         | 63 (100)         | 468 (98.5)        | 94 (99)          | 265 (100)         | 53 (100)         | 249 (97.7)        | 50 (98)          | 210 (100)         | 42 (100)         |
|                                                          | Yes        | 0 (0)             | 0 (0)            | 41 (0.7)             | 11 (1)           | 38 (1.9)          | ___ <sup>a</sup> | ___ <sup>a</sup> | ___ <sup>a</sup> | ___ <sup>a</sup>  | ___ <sup>a</sup> | 0 (0)             | 0 (0)            | 0 (0)             | 0 (0)            | ___ <sup>a</sup>  | ___ <sup>a</sup> | 0 (0)             | 0 (0)            | ___ <sup>a</sup>  | ___ <sup>a</sup> | 0 (0)             | 0 (0)            |
| Congenital Anomalies of the Genital Organs               | No         | 104 (94.6)        | 20 (90.9)        | 5554 (97.7)          | 1111 (97.7)      | 1962 (96.9)       | 391 (96.5)       | 1539 (99.6)      | 307 (99.4)       | 933 (99.8)        | 186 (99.5)       | 551 (99.3)        | 110 (99.1)       | 311 (98.7)        | 62 (98.4)        | 466 (98.1)        | 92 (96.8)        | 259 (97.7)        | 52 (98.1)        | 245 (96.1)        | 48 (94.1)        | 205 (97.6)        | 40 (95.2)        |
|                                                          | Yes        | ___ <sup>a</sup>  | ___ <sup>a</sup> | 131 (2.3)            | 26 (2.3)         | 63 (3.1)          | 14 (3.5)         | ___ <sup>a</sup> | ___ <sup>a</sup> | ___ <sup>a</sup>  | ___ <sup>a</sup> | ___ <sup>a</sup>  | ___ <sup>a</sup> | ___ <sup>a</sup>  | ___ <sup>a</sup> | ___ <sup>a</sup>  | ___ <sup>a</sup> | ___ <sup>a</sup>  | ___ <sup>a</sup> | ___ <sup>a</sup>  | ___ <sup>a</sup> | ___ <sup>a</sup>  | ___ <sup>a</sup> |
| Congenital Anomalies of the Digestive System             | No         | 103 (93.6)        | 21 (95.5)        | 5635 (99.1)          | 1125 (98.9)      | 2013 (99.4)       | 401 (99)         | 1535 (99.4)      | 307 (99.4)       | 923 (98.7)        | 184 (98.4)       | 555 (100)         | 111 (100)        | 315 (100)         | 63 (100)         | 469 (98.7)        | 94 (99)          | 265 (100)         | 53 (100)         | 255 (100)         | 51 (100)         | 210 (100)         | 42 (100)         |
|                                                          | Yes        | ___ <sup>a</sup>  | ___ <sup>a</sup> | 50 (0.9)             | 12 (1.1)         | 12 (0.6)          | ___ <sup>a</sup> | ___ <sup>a</sup> | ___ <sup>a</sup> | 12 (1.3)          | ___ <sup>a</sup> | 0 (0)             | 0 (0)            | 0 (0)             | 0 (0)            | ___ <sup>a</sup>  | ___ <sup>a</sup> | 0 (0)             | 0 (0)            | 0 (0)             | 0 (0)            | 0 (0)             | 0 (0)            |
| Congenital Musculoskeletal Deformities                   | No         | 107 (97.3)        | 21 (95.5)        | 5560 (97.8)          | 1113 (97.9)      | 1965 (97)         | 394 (97.3)       | 1536 (99.4)      | 308 (99.7)       | 918 (98.2)        | 184 (98.4)       | 555 (100)         | 111 (100)        | 315 (100)         | 63 (100)         | 468 (98.5)        | 94 (99)          | 260 (98.1)        | 51 (96.2)        | 255 (100)         | 51 (100)         | 210 (100)         | 42 (100)         |
|                                                          | Yes        | ___ <sup>a</sup>  | ___ <sup>a</sup> | 125                  |                  |                   |                  |                  |                  |                   |                  |                   |                  |                   |                  |                   |                  |                   |                  |                   |                  |                   |                  |

|                                                                |     |           |           |             |             |             |            |             |            |            |            |            |            |            |           |            |           |            |           |            |           |            |           |
|----------------------------------------------------------------|-----|-----------|-----------|-------------|-------------|-------------|------------|-------------|------------|------------|------------|------------|------------|------------|-----------|------------|-----------|------------|-----------|------------|-----------|------------|-----------|
| Intrauterine Placental Insufficiency                           | No  | 110 (100) | 22 (100)  | 5610 (98.7) | 1121 (98.6) | 1991 (98.3) | 395 (97.5) | 1538 (99.6) | 306 (99)   | 930 (99.5) | 184 (98.4) | 551 (99.3) | 109 (98.2) | 307 (97.5) | 62 (98.4) | 467 (98.3) | 93 (97.9) | 252 (95.1) | 51 (96.2) | 255 (100)  | 51 (100)  | 207 (98.6) | 41 (97.6) |
|                                                                | Yes | 0 (0)     | 0 (0)     | 75 (1.3)    | 16 (1.4)    | 34 (1.7)    | ___        | ___         | ___        | ___        | ___        | ___        | ___        | ___        | ___       | ___        | ___       | 13 (4.9)   | ___       | 0 (0)      | 0 (0)     | ___        | ___       |
| Infectious Disease (Acute)                                     | No  | 110 (100) | 22 (100)  | 4497 (79.1) | 899 (79.1)  | 1149 (56.7) | 234 (57.8) | 826 (53.5)  | 158 (51.1) | 432 (46.2) | 87 (46.5)  | 279 (50.3) | 51 (46)    | 157 (49.8) | 30 (47.6) | 177 (37.3) | 35 (36.8) | 48 (18.1)  | ___       | 74 (29)    | 16 (31.4) | 69 (32.9)  | 14 (33.3) |
|                                                                | Yes | 0 (0)     | 0 (0)     | 1188 (20.9) | 238 (20.9)  | 876 (43.3)  | 171 (42.2) | 719 (46.5)  | 151 (48.9) | 503 (53.8) | 100 (53.5) | 276 (49.7) | 60 (54.1)  | 158 (50.2) | 33 (52.4) | 298 (62.7) | 60 (63.2) | 217 (81.9) | 44 (83)   | 181 (71)   | 35 (68.6) | 141 (67.1) | 28 (66.7) |
| Neoplasm (Acute)                                               | No  | 110 (100) | 22 (100)  | 5629 (99)   | 1128 (99.2) | 2007 (99.1) | 400 (98.8) | 1539 (99.6) | 307 (99.4) | 910 (97.3) | 183 (97.9) | 555 (100)  | 111 (100)  | 306 (97.1) | 60 (95.2) | 444 (93.5) | 90 (94.7) | 265 (100)  | 53 (100)  | 250 (98)   | 50 (98)   | 198 (94.3) | 40 (95.2) |
|                                                                | Yes | 0 (0)     | 0 (0)     | 56 (1)      | ___         | 18 (0.9)    | ___        | ___         | ___        | 25 (2.7)   | ___        | 0 (0)      | 0 (0)      | ___        | ___       | 31 (6.5)   | ___       | 0 (0)      | 0 (0)     | ___        | ___       | 12 (5.7)   | ___       |
| Endocrine, metabolic, and immunity disorders (Acute)           | No  | 110 (100) | 22 (100)  | 5453 (95.9) | 1084 (95.3) | 1869 (92.3) | 371 (91.6) | 1436 (92.9) | 284 (91.9) | 866 (92.6) | 170 (90.9) | 513 (92.4) | 101 (91)   | 297 (94.3) | 59 (93.7) | 427 (89.9) | 85 (89.5) | 211 (79.6) | 42 (79.3) | 214 (83.9) | 43 (84.3) | 200 (95.2) | 39 (92.9) |
|                                                                | Yes | 0 (0)     | 0 (0)     | 232 (4.1)   | 53 (4.7)    | 156 (7.7)   | 34 (8.4)   | 109 (7.1)   | 25 (8.1)   | 69 (7.4)   | 17 (9.1)   | 42 (7.6)   | ___        | 18 (5.7)   | ___       | 48 (10.1)  | ___       | 54 (20.4)  | 11 (20.8) | 41 (16.1)  | ___       | ___        | ___       |
| Diseases of blood and blood-forming organs (Acute)             | No  | 110 (100) | 22 (100)  | 5529 (97.3) | 1103 (97)   | 1925 (95.1) | 384 (94.8) | 1454 (94.1) | 287 (92.9) | 879 (94.7) | 173 (92.5) | 496 (89.4) | 99 (89.2)  | 280 (88.9) | 57 (90.5) | 393 (82.7) | 79 (83.2) | 239 (90.2) | 47 (88.7) | 174 (68.2) | 38 (74.5) | 173 (82.4) | 36 (85.7) |
|                                                                | Yes | 0 (0)     | 0 (0)     | 156 (2.7)   | 34 (3)      | 100 (4.9)   | 21 (5.2)   | 91 (5.9)    | 22 (7.1)   | 56 (6)     | 14 (7.5)   | 59 (10.6)  | 12 (10.8)  | 35 (11.1)  | ___       | 82 (17.3)  | 16 (16.8) | 26 (9.8)   | ___       | 81 (31.8)  | 13 (25.5) | 37 (17.6)  | ___       |
| Diseases of the nervous system and sense organs (Acute)        | No  | 110 (100) | 22 (100)  | 4983 (87.7) | 996 (87.6)  | 1220 (60.3) | 250 (61.7) | 553 (35.8)  | 121 (39.2) | 225 (24.1) | 48 (25.7)  | 209 (37.7) | 38 (34.2)  | 64 (20.3)  | 14 (22.2) | 99 (20.8)  | 23 (24.2) | 47 (17.7)  | ___       | 62 (24.3)  | 13 (25.5) | 27 (12.9)  | ___       |
|                                                                | Yes | 0 (0)     | 0 (0)     | 702 (12.4)  | 141 (12.4)  | 805 (39.8)  | 155 (38.3) | 992 (64.2)  | 188 (60.8) | 710 (75.9) | 139 (74.3) | 346 (62.3) | 73 (65.8)  | 251 (79.7) | 49 (77.8) | 376 (79.2) | 72 (75.8) | 218 (82.3) | 44 (83)   | 193 (75.7) | 38 (74.5) | 183 (87.1) | 36 (85.7) |
| Diseases of the circulatory system (Acute)                     | No  | 110 (100) | 22 (100)  | 5612 (98.7) | 1121 (98.6) | 2010 (99.3) | 400 (98.8) | 1524 (98.6) | 303 (98.1) | 924 (98.8) | 183 (97.9) | 545 (98.2) | 109 (98.2) | 315 (100)  | 63 (100)  | 475 (100)  | 95 (100)  | 256 (96.6) | 51 (96.2) | 255 (100)  | 51 (100)  | 210 (100)  | 42 (100)  |
|                                                                | Yes | 0 (0)     | 0 (0)     | 73 (1.3)    | 16 (1.4)    | 15 (0.7)    | ___        | 21 (1.4)    | ___        | 11 (1.2)   | ___        | ___        | ___        | 0 (0)      | 0 (0)     | 0 (0)      | 0 (0)     | ___        | ___       | 0 (0)      | 0 (0)     | 0 (0)      | 0 (0)     |
| Diseases of the respiratory system (Acute)                     | No  | 93 (84.6) | 18 (81.8) | 3423 (60.2) | 677 (59.5)  | 428 (21.1)  | 92 (22.7)  | 264 (17.1)  | 61 (19.7)  | 66 (7.1)   | 17 (9.1)   | 71 (12.8)  | 17 (15.3)  | 0 (0)      | 0 (0)     | 35 (7.4)   | ___       | 34 (12.8)  | ___       | 15 (5.9)   | ___       | 20 (9.5)   | ___       |
|                                                                | Yes | 17 (15.5) | ___       | 2262 (39.8) | 460 (40.5)  | 1597 (78.9) | 313 (77.3) | 1281 (82.9) | 248 (80.3) | 869 (92.9) | 170 (90.9) | 484 (87.2) | 94 (84.7)  | 315 (100)  | 63 (100)  | 440 (92.6) | 88 (92.6) | 231 (87.2) | 48 (90.6) | 240 (94.1) | 47 (92.2) | 190 (90.5) | 38 (90.5) |
| Diseases of the digestive system (Acute)                       | No  | 98 (89.1) | 19 (86.4) | 4104 (72.2) | 825 (72.6)  | 1252 (61.8) | 246 (60.7) | 868 (56.2)  | 177 (57.3) | 460 (49.2) | 92 (49.2)  | 282 (50.8) | 58 (52.3)  | 144 (45.7) | 30 (47.6) | 148 (31.2) | 30 (31.6) | 108 (40.8) | 19 (35.9) | 87 (34.1)  | 19 (37.3) | 61 (29.1)  | 14 (33.3) |
|                                                                | Yes | 12 (10.9) | ___       | 1581 (27.8) | 312 (27.4)  | 773 (38.2)  | 159 (39.3) | 677 (43.8)  | 132 (42.7) | 475 (50.8) | 95 (50.8)  | 273 (49.2) | 53 (47.8)  | 171 (54.3) | 33 (52.4) | 327 (68.8) | 65 (68.4) | 157 (59.3) | 34 (64.2) | 168 (65.9) | 32 (62.8) | 149 (71)   | 28 (66.7) |
| Diseases of the genitourinary system (Acute)                   | No  | 84 (76.4) | 16 (72.7) | 4259 (74.9) | 872 (76.7)  | 1340 (66.2) | 273 (67.4) | 841 (54.4)  | 174 (56.3) | 564 (60.3) | 110 (58.8) | 333 (60)   | 65 (58.6)  | 180 (57.1) | 36 (57.1) | 233 (49.1) | 49 (51.6) | 146 (55.1) | 30 (56.6) | 159 (62.4) | 31 (60.8) | 105 (50)   | 21 (50)   |
|                                                                | Yes | 26 (23.6) | ___       | 1426 (25.1) | 265 (23.3)  | 685 (33.8)  | 132 (32.6) | 704 (45.6)  | 135 (43.7) | 371 (39.7) | 77 (41.2)  | 222 (40)   | 46 (41.4)  | 135 (42.9) | 27 (42.9) | 242 (51)   | 46 (48.4) | 119 (44.9) | 23 (43.4) | 96 (37.7)  | 20 (39.2) | 105 (50)   | 21 (50)   |
| Diseases of the skin and subcutaneous tissue (Acute)           | No  | 97 (88.2) | 19 (86.4) | 4864 (85.6) | 981 (86.3)  | 1512 (74.7) | 304 (75.1) | 884 (57.2)  | 188 (60.8) | 550 (58.8) | 106 (56.7) | 349 (62.9) | 68 (61.3)  | 136 (43.2) | 30 (47.6) | 232 (48.8) | 52 (54.7) | 138 (52.1) | 26 (49.1) | 123 (48.2) | 23 (45.1) | 95 (45.2)  | 20 (47.6) |
|                                                                | Yes | 13 (11.8) | ___       | 821 (14.4)  | 156 (13.7)  | 513 (25.3)  | 101 (24.9) | 661 (42.8)  | 121 (39.2) | 385 (41.2) | 81 (43.3)  | 206 (37.1) | 43 (38.7)  | 179 (56.8) | 33 (52.4) | 243 (51.2) | 43 (45.3) | 127 (47.9) | 27 (50.9) | 132 (51.8) | 28 (54.9) | 115 (54.8) | 22 (52.4) |
| Diseases of the musculoskeletal system (Acute)                 | No  | 96 (87.3) | 20 (90.9) | 5570 (98)   | 1111 (97.7) | 1965 (97)   | 388 (95.8) | 1512 (97.9) | 300 (97.1) | 854 (91.3) | 170 (90.9) | 505 (91)   | 101 (91)   | 294 (93.3) | 58 (92.1) | 428 (90.1) | 86 (90.5) | 235 (88.7) | 46 (86.8) | 231 (90.6) | 46 (90.2) | 146 (69.5) | 30 (71.4) |
|                                                                | Yes | 14 (12.7) | ___       | 115 (2)     | 26 (2.3)    | 60 (3)      | 17 (4.2)   | 33 (2.1)    | ___        | 81 (8.7)   | ___        | 50 (9)     | ___        | 21 (6.7)   | ___       | 47 (9.9)   | ___       | 30 (11.3)  | ___       | 24 (9.4)   | ___       | 64 (30.5)  | 12 (28.6) |
| Congenital anomalies                                           | No  | 98 (89.1) | 19 (86.4) | 4534 (79.8) | 896 (78.8)  | 1540 (76.1) | 303 (74.8) | 1291 (83.6) | 254 (82.2) | 787 (84.2) | 154 (82.4) | 474 (85.4) | 95 (85.6)  | 269 (85.4) | 54 (85.7) | 378 (79.6) | 74 (77.9) | 212 (80)   | 40 (75.5) | 203 (79.6) | 38 (74.5) | 167 (79.5) | 32 (76.2) |
|                                                                | Yes | 12 (10.9) | ___       | 1151 (20.3) | 241 (21.2)  | 485 (24)    | 102 (25.2) | 254 (16.4)  | 55 (17.8)  | 148 (15.8) | 33 (17.7)  | 81 (14.6)  | 16 (14.4)  | 46 (14.6)  | ___       | 97 (20.4)  | 21 (22.1) | 53 (20)    | 13 (24.5) | 52 (20.4)  | 13 (25.5) | 43 (20.5)  | ___       |
| Certain conditions originating in the perinatal period (Acute) | No  | 63 (57.3) | 12 (54.6) | 1754 (30.9) | 351 (30.9)  | 619 (30.6)  | 125 (30.9) | 600 (38.8)  | 113 (36.6) | 318 (34)   | 56 (30)    | 238 (42.9) | 47 (42.3)  | 117 (37.1) | 27 (42.9) | 202 (42.5) | 41 (43.2) | 78 (29.4)  | 18 (34)   | 140 (54.9) | 28 (54.9) | 89 (42.4)  | 18 (42.9) |
|                                                                | Yes | 47 (42.7) | ___       | 3931 (69.2) | 786 (69.1)  | 1406 (69.4) | 280 (69.1) | 945 (61.2)  | 196 (63.4) | 617 (66)   | 131 (70.1) | 317 (57.1) | 64 (57.7)  | 198 (62.9) | 36 (57.1) | 273 (57.5) | 54 (56.8) | 187 (70.6) | 35 (66)   | 115 (45.1) | 23 (45.1) | 121 (57.6) | 24 (57.1) |
| Injury and poisoning (Acute)                                   | No  | 110 (100) | 22 (100)  | 5424 (95.4) | 1078 (94.8) | 1780 (87.9) | 354 (87.4) | 1166 (75.5) | 236 (76.4) | 627 (67.1) | 123 (65.8) | 360 (64.9) | 76 (68.5)  | 129 (41)   | 30 (47.6) | 255 (53.7) | 51 (53.7) | 132 (49.8) | 28 (52.8) | 88 (34.5)  | 22 (43.1) | 87 (41.4)  | 19 (45.2) |
|                                                                | Yes | 0 (0)     | 0 (0)     | 261 (4.6)   | 59 (5.2)    | 245 (12.1)  | 51 (12.6)  | 379 (24.5)  | 73 (23.6)  | 308 (32.9) | 64 (34.2)  | 195 (35.1) | 35 (31.5)  | 186 (59.1) | 33 (52.4) | 220 (46.3) | 44 (46.3) | 133 (50.2) | 25 (47.2) | 167 (65.5) | 29 (56.9) | 123 (58.6) | 23 (54.8) |
| Infectious Disease (Chronic)                                   | No  | 110 (100) | 22 (100)  | 5685 (100)  | 1137 (100)  | 2021 (99.8) | 404 (99.8) | 1545 (100)  | 309 (100)  | 935 (100)  | 187 (100)  | 555 (100)  | 111 (100)  | 315 (100)  | 63 (100)  | 475 (100)  | 95 (100)  | 261 (98.5) | 52 (98.1) | 255 (100)  | 51 (100)  | 210 (100)  | 42 (100)  |
|                                                                | Yes | 0 (0)     | 0 (0)     | 0 (0)       | 0 (0)       | ___         | ___        | 0 (0)       | 0 (0)      | 0 (0)      | 0 (0)      | 0 (0)      | 0 (0)      | 0 (0)      | 0 (0)     | 0 (0)      | 0 (0)     | ___        | ___       | 0 (0)      | 0 (0)     | 0 (0)      | 0 (0)     |
| Neoplasm (Chronic)                                             | No  | 110 (100) | 22 (100)  | 5684 (100)  | 1136 (99.9) | 2016 (99.6) | 403 (99.5) | 1545 (100)  | 309 (100)  | 935 (100)  | 187 (100)  | 555 (100)  | 111 (100)  | 315 (100)  | 63 (100)  | 475 (100)  | 95 (100)  | 265 (100)  | 53 (100)  | 255 (100)  | 51 (100)  | 210 (100)  | 42 (100)  |
|                                                                | Yes | 0 (0)     | 0 (0)     | ___         | ___         | ___         | ___        | 0 (0)       | 0 (0)      | 0 (0)      | 0 (0)      | 0 (0)      | 0 (0)      | 0 (0)      | 0 (0)     | 0 (0)      | 0 (0)     | 0 (0)      | 0 (0)     | 0 (0)      | 0 (0)     | 0 (0)      | 0 (0)     |
| Endocrine, metabolic, and immunity disorders (Chronic)         | No  | 110 (100) | 22 (100)  | 5462 (96.1) | 1085 (95.4) | 1916 (94.6) | 379 (93.6) | 1490 (96.4) | 295 (95.5) | 899 (96.2) | 177 (94.7) | 536 (96.6) | 106 (95.5) | 298 (94.6) | 58 (92.1) | 456 (96)   | 90 (94.7) | 250 (94.3) | 50 (94.3) | 251 (98.4) | 50 (98)   | 198 (94.3) | 39 (92.9) |
|                                                                | Yes | 0 (0)     | 0 (0)     | 223 (3.9)   | 52 (4.6)    | 109 (5.4)   | 26 (6.4)   | 55 (3.6)    | 14 (4.5)   | 36 (3.9)   | ___        | 19 (3.4)   | ___        | 17 (5.4)   | ___       | 19 (4)     | ___       | 15 (5.7)   | ___       | ___        | ___       | 12 (5.7)   | ___       |
| Diseases of blood and blood-forming organs (Chronic)           | No  | 110 (100) | 22 (100)  | 5580 (98.2) | 1112 (97.8) | 1947 (96.2) | 390 (96.3) | 1491 (96.5) | 296 (95.8) | 892 (95.4) | 177 (94.7) | 511 (92.1) | 105 (94.6) | 312 (99.1) | 62 (98.4) | 459 (96.6) | 93 (97.9) | 255 (96.2) | 51 (96.2) | 205 (80.4) | 43 (84.3) | 210 (100)  | 42 (100)  |
|                                                                | Yes | 0 (0)     | 0 (0)     | 105 (1.9)   | 25 (2.2)    | 78 (3.9)    | 15 (3.7)   | 54 (3.5)    | 13 (4.2)   | 43 (4.6)   | ___        | 44 (7.9)   | ___        | ___        | ___       | 16 (3.4)   | ___       | ___        | ___       | 50 (19.6)  | ___       | 0 (0)      | 0 (0)     |
| Diseases of the nervous system and sense organs (Chronic)      | No  | 110 (100) | 22 (100)  | 4935 (86.8) | 975 (85.8)  | 1708 (84.4) | 339 (83.7) | 1392 (90.1) | 277 (89.6) | 781 (83.5) | 158 (84.5) | 497 (89.6) | 100 (90.1) | 291 (92.4) | 57 (90.5) | 448 (94.3) | 88 (92.6) | 222 (83.8) | 45 (84.9) | 237 (92.9) | 47 (92.2) | 186 (88.6) | 37 (88.1) |
|                                                                | Yes | 0 (0)     | 0 (0)     | 750 (13.2)  | 162 (14.3)  | 317 (15.7)  | 66 (16.3)  | 153 (9.9)   | 32 (10.4)  | 154 (16.5) | 29 (15.5)  | 58 (10.5)  | 11 (9.9)   | 24 (7.6)   | ___       | 27 (5.7)   | ___       | 43 (16.2)  | ___       | 18 (7.1)   | ___       | 24 (11.4)  | 5 (11.9)  |
| Diseases of the circulatory system (Chronic)                   | No  | 110 (100) | 22 (100)  | 5441 (95.7) | 1083 (95.3) | 1921 (94.9) | 379 (93.6) | 1508 (97.6) | 301 (97.4) | 904 (96.7) | 181 (96.8) | 536 (96.6) | 107 (96.4) | 312 (99.1) | 62 (98.4) | 461 (97.1) | 92 (96.8) | 258 (97.4) | 51 (96.2) | 242 (94.9) | 48 (94.1) | 196 (93.4) | 40 (95.2) |
|                                                                | Yes | 0 (0)     | 0 (0)     | 244 (4.3)   | 54 (4.8)    | 104 (5.1)   | 26 (6.4)   | 37 (2.4)    | ___        | 31 (3.3)   | ___        | 19 (3.4)   | ___        | ___        | ___       | 14 (3)     | ___       | ___        | ___       | 13 (5.9)   | ___       | 14 (6.7)   | ___       |
| Diseases of the respiratory system (Chronic)                   | No  | 110 (100) | 22 (1     |             |             |             |            |             |            |            |            |            |            |            |           |            |           |            |           |            |           |            |           |

**Table 7: Characteristics of TX Circumcision Matched Cohorts by Age at Exposure**

|                                                          |            | >28 days - ≤6 months |                  | >6 months - ≤1 yr |                  | >1 yr - ≤1.5 yrs |                  | >1.5 yrs - ≤2 yrs |                  | >2 yrs - ≤2.5 yrs |                  | >2.5 yrs - ≤3 yrs |                  | >3 yrs - ≤3.5 yrs |                  | >3.5 yrs - ≤4 yrs |                  | >4 yrs - ≤4.5 yrs |                  | >4.5 yrs - ≤5 yrs |                  |
|----------------------------------------------------------|------------|----------------------|------------------|-------------------|------------------|------------------|------------------|-------------------|------------------|-------------------|------------------|-------------------|------------------|-------------------|------------------|-------------------|------------------|-------------------|------------------|-------------------|------------------|
|                                                          |            | Exposure             |                  | Exposure          |                  | Exposure         |                  | Exposure          |                  | Exposure          |                  | Exposure          |                  | Exposure          |                  | Exposure          |                  | Exposure          |                  | Exposure          |                  |
|                                                          |            | No                   | Yes              | No                | Yes              | No               | Yes              | No                | Yes              | No                | Yes              | No                | Yes              | No                | Yes              | No                | Yes              | No                | Yes              | No                | Yes              |
|                                                          |            | n(%)                 | n(%)             | n(%)              | n(%)             | n(%)             | n(%)             | n(%)              | n(%)             | n(%)              | n(%)             | n(%)              | n(%)             | n(%)              | n(%)             | n(%)              | n(%)             | n(%)              | n(%)             | n(%)              | n(%)             |
| Sex                                                      | Female     | 0 (0)                | 0 (0)            | 0 (0)             | 0 (0)            | 0 (0)            | 0 (0)            | 0 (0)             | 0 (0)            | 0 (0)             | 0 (0)            | 0 (0)             | 0 (0)            | 0 (0)             | 0 (0)            | 0 (0)             | 0 (0)            | 0 (0)             | 0 (0)            | 0 (0)             | 0 (0)            |
|                                                          | Male       | 13540 (100)          | 2708 (100)       | 7930 (100)        | 1586 (100)       | 5405 (100)       | 1081 (100)       | 3025 (100)        | 605 (100)        | 2360 (100)        | 472 (100)        | 1700 (100)        | 340 (100)        | 1305 (100)        | 261 (100)        | 1065 (100)        | 213 (100)        | 800 (100)         | 160 (100)        | 500 (100)         | 100 (100)        |
| Race                                                     | White      | 3508 (25.9)          | 700 (25.9)       | 1845 (23.3)       | 369 (23.3)       | 1132 (20.9)      | 219 (20.3)       | 411 (13.6)        | 87 (14.4)        | 373 (15.8)        | 71 (15)          | 201 (11.8)        | 43 (12.7)        | 81 (6.2)          | 16 (6.1)         | 59 (5.5)          | 15 (7)           | 51 (6.4)          | ___ <sup>a</sup> | 45 (9)            | 10 (10)          |
|                                                          | Black      | 3694 (27.3)          | 715 (26.4)       | 2286 (28.8)       | 436 (27.5)       | 1298 (24)        | 252 (23.3)       | 567 (18.7)        | 108 (17.9)       | 412 (17.5)        | 77 (16.3)        | 215 (12.7)        | 48 (14.1)        | 234 (17.9)        | 46 (17.6)        | 138 (13)          | 29 (13.6)        | 100 (12.5)        | 23 (14.4)        | 30 (6)            | ___ <sup>a</sup> |
|                                                          | Hispanic   | 5551 (41)            | 1137 (42)        | 3343 (42.2)       | 684 (43.1)       | 2683 (49.6)      | 556 (51.4)       | 1949 (64.4)       | 388 (64.1)       | 1534 (65)         | 313 (66.3)       | 1260 (74.1)       | 245 (72.1)       | 977 (74.9)        | 196 (75.1)       | 861 (80.9)        | 167 (78.4)       | 620 (77.5)        | 123 (76.9)       | 425 (85)          | 82 (82)          |
|                                                          | Other      | 787 (5.8)            | 156 (5.8)        | 456 (5.8)         | 97 (6.1)         | 292 (5.4)        | 54 (5)           | 98 (3.2)          | 22 (3.6)         | 41 (1.7)          | 11 (2.3)         | 24 (1.4)          | ___ <sup>a</sup> | 13 (1)            | ___ <sup>a</sup> | ___ <sup>a</sup>  | ___ <sup>a</sup> | 29 (3.6)          | ___ <sup>a</sup> | 0 (0)             | 0 (0)            |
| Income Based on ZIP Code of Residence (quartile)         | Quartile 1 | 3471 (25.6)          | 722 (26.7)       | 2033 (25.6)       | 394 (24.8)       | 1638 (30.3)      | 318 (29.4)       | 1110 (36.7)       | 209 (34.6)       | 886 (37.5)        | 168 (35.6)       | 730 (42.9)        | 138 (40.6)       | 514 (39.4)        | 102 (39.1)       | 404 (37.9)        | 79 (37.1)        | 298 (37.3)        | 57 (35.6)        | 233 (46.6)        | 44 (44)          |
|                                                          | Quartile 2 | 3378 (25)            | 660 (24.4)       | 1866 (23.5)       | 384 (24.2)       | 1287 (23.8)      | 275 (25.4)       | 753 (24.9)        | 152 (25.1)       | 546 (23.1)        | 115 (24.4)       | 451 (26.5)        | 93 (27.4)        | 353 (27.1)        | 70 (26.8)        | 298 (28)          | 58 (27.2)        | 251 (31.4)        | 53 (33.1)        | 126 (25.2)        | 28 (28)          |
|                                                          | Quartile 3 | 2996 (22.1)          | 587 (21.7)       | 1789 (22.6)       | 359 (22.6)       | 1187 (22)        | 236 (21.8)       | 654 (21.6)        | 129 (21.3)       | 469 (19.9)        | 101 (21.4)       | 196 (11.5)        | 48 (14.1)        | 259 (19.9)        | 54 (20.7)        | 201 (18.9)        | 40 (18.8)        | 93 (11.6)         | 24 (15)          | 68 (13.6)         | 17 (17)          |
|                                                          | Quartile 4 | 3695 (27.4)          | 739 (27.3)       | 2242 (28.3)       | 449 (28.3)       | 1293 (23.9)      | 252 (23.3)       | 508 (16.8)        | 115 (19)         | 459 (19.5)        | 88 (18.6)        | 323 (19)          | 61 (17.9)        | 179 (13.7)        | 35 (13.4)        | 162 (15.2)        | 36 (16.9)        | 158 (19.8)        | 26 (16.3)        | 73 (14.6)         | 11 (11)          |
| Number of Outpatient Visits (quartile)                   | Quartile 1 | 1547 (11.4)          | 298 (11)         | 698 (8.8)         | 138 (8.7)        | 357 (6.6)        | 80 (7.4)         | 172 (5.7)         | 39 (6.5)         | 171 (7.3)         | 38 (8.1)         | 134 (7.9)         | 32 (9.4)         | 77 (5.9)          | 17 (6.5)         | 65 (6.1)          | 14 (6.6)         | 58 (7.3)          | 15 (9.4)         | 35 (7)            | ___ <sup>a</sup> |
|                                                          | Quartile 2 | 2632 (19.4)          | 515 (19)         | 1178 (14.9)       | 248 (15.6)       | 1231 (22.8)      | 234 (21.7)       | 545 (18)          | 112 (18.5)       | 515 (21.8)        | 99 (21)          | 318 (18.7)        | 62 (18.2)        | 288 (22.1)        | 59 (22.6)        | 232 (21.8)        | 43 (20.2)        | 143 (17.9)        | 28 (17.5)        | 118 (23.6)        | 24 (24)          |
|                                                          | Quartile 3 | 2956 (21.8)          | 566 (20.9)       | 2885 (36.4)       | 572 (36.1)       | 1504 (27.8)      | 299 (27.7)       | 882 (29.2)        | 179 (29.6)       | 609 (25.8)        | 123 (26.1)       | 426 (25.1)        | 83 (24.4)        | 331 (25.4)        | 67 (25.7)        | 238 (22.4)        | 55 (25.8)        | 207 (25.9)        | 43 (26.9)        | 116 (23.2)        | 22 (22)          |
|                                                          | Quartile 4 | 6405 (47.3)          | 1329 (49.1)      | 3169 (40)         | 628 (39.6)       | 2313 (42.8)      | 468 (43.3)       | 1426 (47.1)       | 275 (45.5)       | 1065 (45.1)       | 212 (44.9)       | 822 (48.4)        | 163 (47.9)       | 609 (46.7)        | 118 (45.2)       | 530 (49.8)        | 101 (47.4)       | 392 (49)          | 74 (46.3)        | 231 (46.2)        | 46 (46)          |
| Total Number of Inpatient Stays (n)                      | 0          | 0 (0)                | 0 (0)            | 0 (0)             | 0 (0)            | 0 (0)            | 0 (0)            | 0 (0)             | 0 (0)            | 0 (0)             | 0 (0)            | 0 (0)             | 0 (0)            | 0 (0)             | 0 (0)            | 0 (0)             | 0 (0)            | 0 (0)             | 0 (0)            | 0 (0)             | 0 (0)            |
|                                                          | 1          | 12503 (92.3)         | 2482 (91.7)      | 6666 (84.1)       | 1321 (83.3)      | 4385 (81.1)      | 857 (79.3)       | 2226 (73.6)       | 454 (75)         | 1777 (75.3)       | 343 (72.7)       | 1313 (77.2)       | 256 (75.3)       | 976 (74.8)        | 193 (74)         | 727 (68.3)        | 143 (67.1)       | 520 (65)          | 107 (66.9)       | 349 (69.8)        | 69 (69)          |
|                                                          | 2          | 899 (6.6)            | 193 (7.1)        | 1048 (13.2)       | 214 (13.5)       | 759 (14)         | 163 (15.1)       | 506 (16.7)        | 93 (15.4)        | 432 (18.3)        | 98 (20.8)        | 303 (17.8)        | 64 (18.8)        | 225 (17.2)        | 45 (17.2)        | 220 (20.7)        | 45 (21.1)        | 178 (22.3)        | 35 (21.9)        | 97 (19.4)         | 22 (22)          |
|                                                          | 3 or more  | 138 (1)              | 33 (1.2)         | 216 (2.7)         | 51 (3.2)         | 261 (4.8)        | 61 (5.6)         | 293 (9.7)         | 58 (9.6)         | 151 (6.4)         | 31 (6.6)         | 84 (4.9)          | 20 (5.9)         | 104 (8)           | 23 (8.8)         | 118 (11.1)        | 25 (11.7)        | 102 (12.8)        | 18 (11.3)        | 54 (10.8)         | ___ <sup>a</sup> |
| <36 Weeks Gestational Age                                | No         | 12077 (89.2)         | 2399 (88.6)      | 6907 (87.1)       | 1367 (86.2)      | 4764 (88.1)      | 943 (87.2)       | 2765 (91.4)       | 544 (89.9)       | 2220 (94.1)       | 439 (93)         | 1582 (93.1)       | 312 (91.8)       | 1199 (91.9)       | 240 (92)         | 1026 (96.3)       | 205 (96.2)       | 759 (94.9)        | 153 (95.6)       | 478 (95.6)        | 96 (96)          |
|                                                          | Yes        | 1463 (10.8)          | 309 (11.4)       | 1023 (12.9)       | 219 (13.8)       | 641 (11.9)       | 138 (12.8)       | 260 (8.6)         | 61 (10.1)        | 140 (5.9)         | 33 (7)           | 118 (6.9)         | 28 (8.2)         | 106 (8.1)         | 21 (8.1)         | 39 (3.7)          | ___ <sup>a</sup> | 41 (5.1)          | ___ <sup>a</sup> | 22 (4.4)          | ___ <sup>a</sup> |
| Low Birth Weight (<2500g and ≥1500g)                     | No         | 12375 (91.4)         | 2468 (91.1)      | 7069 (89.1)       | 1406 (88.7)      | 4927 (91.2)      | 979 (90.6)       | 2776 (91.8)       | 549 (90.7)       | 2230 (94.5)       | 442 (93.6)       | 1613 (94.9)       | 320 (94.1)       | 1212 (92.9)       | 241 (92.3)       | 1021 (95.9)       | 201 (94.4)       | 760 (95)          | 153 (95.6)       | 477 (95.4)        | 97 (97)          |
|                                                          | Yes        | 1165 (8.6)           | 240 (8.9)        | 861 (10.9)        | 180 (11.4)       | 478 (8.8)        | 102 (9.4)        | 249 (8.2)         | 56 (9.3)         | 130 (5.5)         | 30 (8.4)         | 87 (5.1)          | 20 (5.9)         | 93 (7.1)          | 20 (7.7)         | 44 (4.1)          | 12 (5.6)         | 40 (5)            | ___ <sup>a</sup> | 23 (4.6)          | ___ <sup>a</sup> |
| Very Low Birth Weight (<1500g and ≥1000g)                | No         | 13416 (99.1)         | 2682 (99)        | 7791 (98.3)       | 1554 (98)        | 5304 (98.1)      | 1062 (98.2)      | 2991 (98.9)       | 595 (98.4)       | 2328 (98.6)       | 464 (98.3)       | 1674 (98.5)       | 335 (98.5)       | 1295 (99.2)       | 259 (99.2)       | 1054 (99)         | 212 (99.5)       | 791 (98.9)        | 157 (98.1)       | 500 (100)         | 100 (100)        |
|                                                          | Yes        | 124 (0.9)            | 26 (1)           | 139 (1.8)         | 32 (2)           | 101 (1.9)        | 19 (1.8)         | 34 (1.1)          | ___ <sup>a</sup> | 32 (1.4)          | ___ <sup>a</sup> | 26 (1.5)          | ___ <sup>a</sup> | ___ <sup>a</sup>  | ___ <sup>a</sup> | 11 (1)            | ___ <sup>a</sup> | ___ <sup>a</sup>  | ___ <sup>a</sup> | 0 (0)             | 0 (0)            |
| Extremely Low Birth Weight (<1000g)                      | No         | 13536 (100)          | 2706 (99.9)      | 7878 (99.3)       | 1577 (99.4)      | 5353 (99)        | 1068 (98.8)      | 3005 (99.3)       | 600 (99.2)       | 2346 (99.4)       | 469 (99.4)       | 1696 (99.8)       | 338 (99.4)       | 1299 (99.5)       | 260 (99.6)       | 1057 (99.3)       | 212 (99.5)       | 798 (99.8)        | 159 (99.4)       | 500 (100)         | 100 (100)        |
|                                                          | Yes        | ___ <sup>a</sup>     | ___ <sup>a</sup> | 52 (0.7)          | ___ <sup>a</sup> | 52 (1)           | 13 (1.2)         | 20 (0.7)          | ___ <sup>a</sup> | 14 (0.6)          | ___ <sup>a</sup> | ___ <sup>a</sup>  | ___ <sup>a</sup> | 0 (0)             | 0 (0)            |
| Chromosomal Anomalies                                    | No         | 13526 (99.9)         | 2704 (99.9)      | 7923 (99.9)       | 1584 (99.9)      | 5405 (100)       | 1081 (100)       | 3021 (99.9)       | 604 (99.8)       | 2360 (100)        | 472 (100)        | 1700 (100)        | 340 (100)        | 1305 (100)        | 261 (100)        | 1065 (100)        | 213 (100)        | 800 (100)         | 160 (100)        | 500 (100)         | 100 (100)        |
|                                                          | Yes        | 14 (0.1)             | ___ <sup>a</sup> | ___ <sup>a</sup>  | ___ <sup>a</sup> | 0 (0)            | 0 (0)            | 0 (0)             | ___ <sup>a</sup> | 0 (0)             | 0 (0)            | 0 (0)             | 0 (0)            | 0 (0)             | 0 (0)            | 0 (0)             | 0 (0)            | 0 (0)             | 0 (0)            | 0 (0)             | 0 (0)            |
| Congenital Anomalies of the Heart and Circulatory System | No         | 12699 (93.8)         | 2530 (93.4)      | 7540 (95.1)       | 1493 (94.1)      | 5102 (94.4)      | 1019 (94.3)      | 2862 (94.6)       | 566 (93.6)       | 2203 (93.4)       | 437 (92.6)       | 1553 (91.4)       | 313 (92.1)       | 1245 (95.4)       | 247 (94.6)       | 1030 (96.7)       | 204 (95.8)       | 773 (96.6)        | 153 (95.6)       | 492 (98.4)        | 98 (98)          |
|                                                          | Yes        | 841 (6.2)            | 178 (6.6)        | 390 (4.9)         | 93 (5.9)         | 303 (5.6)        | 62 (5.7)         | 163 (5.4)         | 39 (6.5)         | 157 (6.7)         | 35 (7.4)         | 147 (8.7)         | 27 (7.9)         | 60 (4.6)          | 14 (5.4)         | 35 (3.3)          | ___ <sup>a</sup> | 27 (3.4)          | ___ <sup>a</sup> | ___ <sup>a</sup>  | ___ <sup>a</sup> |
| Congenital Anomalies of the Central Nervous System       | No         | 13471 (99.5)         | 2691 (99.4)      | 7874 (99.3)       | 1573 (99.2)      | 5376 (99.5)      | 1075 (99.4)      | 3003 (99.3)       | 601 (99.3)       | 2359 (99.4)       | 471 (99.8)       | 1695 (99.7)       | 339 (99.7)       | 1300 (99.6)       | 259 (99.2)       | 1060 (99.5)       | 212 (99.5)       | 800 (100)         | 160 (100)        | 500 (100)         | 100 (100)        |
|                                                          | Yes        | 69 (0.5)             | 17 (0.6)         | 56 (0.7)          | 13 (0.8)         | 29 (0.5)         | ___ <sup>a</sup> | 22 (0.7)          | ___ <sup>a</sup> | ___ <sup>a</sup>  | ___ <sup>a</sup> | 0 (0)             | 0 (0)            | 0 (0)             | 0 (0)            |
| Congenital Anomalies of the Eye                          | No         | 13479 (99.6)         | 2694 (99.5)      | 7896 (99.6)       | 1579 (99.6)      | 5387 (99.7)      | 1077 (99.6)      | 3017 (99.7)       | 603 (99.7)       | 2357 (99.9)       | 471 (99.8)       | 1697 (99.8)       | 339 (99.7)       | 1297 (99.4)       | 259 (99.2)       | 1065 (100)        | 213 (100)        | 800 (100)         | 160 (100)        | 500 (100)         | 100 (100)        |
|                                                          | Yes        | 61 (0.5)             | 14 (0.5)         | 34 (0.4)          | ___ <sup>a</sup> | 18 (0.3)         | ___ <sup>a</sup> | ___ <sup>a</sup>  | ___ <sup>a</sup> | 0 (0)             | 0 (0)            | 0 (0)             | 0 (0)            | 0 (0)             | 0 (0)            |
| Congenital Anomalies of the Genital Organs               | No         | 13344 (98.6)         | 2669 (98.6)      | 7642 (96.4)       | 1528 (96.3)      | 5255 (97.2)      | 1046 (96.8)      | 2985 (98.7)       | 596 (98.5)       | 2316 (98.1)       | 465 (98.5)       | 1683 (99)         | 335 (98.5)       | 1292 (99)         | 258 (98.9)       | 1051 (98.7)       | 210 (98.6)       | 793 (99.1)        | 159 (99.4)       | 497 (99.4)        | 99 (99)          |
|                                                          | Yes        | 196 (1.5)            | 39 (1.4)         | 288 (3.6)         | 58 (3.7)         | 150 (2.8)        | 35 (3.2)         | 40 (1.3)          | ___ <sup>a</sup> | 44 (1.9)          | ___ <sup>a</sup> | 17 (1)            | ___ <sup>a</sup> | 13 (1)            | ___ <sup>a</sup> | ___ <sup>a</sup>  | ___ <sup>a</sup> | ___ <sup>a</sup>  | ___ <sup>a</sup> | ___ <sup>a</sup>  | ___ <sup>a</sup> |
| Congenital Anomalies of the Digestive System             | No         | 13458 (99.4)         | 2691 (99.4)      | 7877 (99.3)       | 1576 (99.4)      | 5379 (99.5)      | 1076 (99.5)      | 3006 (99.4)       | 601 (99.3)       | 2355 (99.8)       | 471 (99.8)       | 1693 (99.6)       | 338 (99.4)       | 1294 (99.2)       | 259 (99.2)       | 1060 (99.5)       | 212 (99.5)       | 798 (99.8)        | 159 (99.4)       | 500 (100)         | 100 (100)        |
|                                                          | Yes        | 82 (0.6)             | 17 (0.6)         | 53 (0.7)          | ___ <sup>a</sup> | 26 (0.5)         | ___ <sup>a</sup> | 19 (0.6)          | ___ <sup>a</sup> | ___ <sup>a</sup>  | ___ <sup>a</sup> | ___ <sup>a</sup>  | ___ <sup>a</sup> | 11 (0.8)          | ___ <sup>a</sup> | ___ <sup>a</sup>  | ___ <sup>a</sup> | ___ <sup>a</sup>  | ___ <sup>a</sup> | 0 (0)             | 0 (0)            |
| Congenital Musculoskeletal Deformities                   | No         | 13432 (99.2)         | 2682 (99)        | 7792 (98.3)       | 1558 (98.2)      | 5340 (98.8)      | 1069 (98.9)      | 2997 (99.1)       | 599 (99)         | 2353 (99.7)       | 469 (99.4)       | 1685 (99.1)       | 336 (98.8)       | 1297 (99.4)       | 259 (99.2)       | 1059 (99.4)       | 211 (99.1)       | 791 (98.9)        | 158 (98.8)       | 500 (100)         | 100 (100)        |
|                                                          | Yes        | 108 (0.8)            | 26 (1)           | 138 (1.7)         | 28 (1.8)         | 65 (1.2)         | 12 (1.1)         | 28 (0.9)          | ___ <sup>a</sup> | ___ <sup>a</sup>  | ___ <sup>a</sup> | 15 (0.9)          | ___ <sup>a</sup> | ___ <sup>a</sup>  | 0 (0)            |
| Other Congenital Anomalies                               | No         | 13530 (99.9)         | 2705 (99.9)      | 7928 (100)        | 1585 (99.9)      | 5391 (99.7)      | 1079 (99.8)      | 3020 (99.8)       | 604 (99.8)       | 2360 (100)        | 472 (100)        | 1694 (99.7)       | 339 (99.7)       | 1301 (99.7)       | 260 (99.6)       | 1065 (100)        | 213 (100)        | 800 (100)         | 160 (100)        | 500 (100)         | 100 (100)        |
|                                                          | Yes        | ___ <sup>a</sup>     | ___ <sup>a</sup> | ___ <sup>a</sup>  | ___ <sup>a</sup> | 14 (0.3)         | ___ <sup>a</sup> | ___ <sup>a</sup>  |                  |                   |                  |                   |                  |                   |                  |                   |                  |                   |                  |                   |                  |

|                                                                |     |                  |                  |                  |                  |                  |                  |                  |                  |                  |                  |                  |                  |                  |                  |                  |                  |                  |                  |                  |                  |
|----------------------------------------------------------------|-----|------------------|------------------|------------------|------------------|------------------|------------------|------------------|------------------|------------------|------------------|------------------|------------------|------------------|------------------|------------------|------------------|------------------|------------------|------------------|------------------|
| Intrauterine Placental Insufficiency                           | No  | 13298 (98.2)     | 2656 (98.1)      | 7777 (98.1)      | 1557 (98.2)      | 5307 (98.2)      | 1062 (98.2)      | 2970 (98.2)      | 595 (98.4)       | 2319 (98.3)      | 464 (98.3)       | 1665 (97.9)      | 332 (97.7)       | 1293 (99.1)      | 259 (99.2)       | 1059 (99.4)      | 211 (99.1)       | 798 (99.8)       | 159 (99.4)       | 488 (97.6)       | 97 (97)          |
|                                                                | Yes | 242 (1.8)        | 52 (1.9)         | 153 (1.9)        | 29 (1.8)         | 98 (1.8)         | 19 (1.8)         | 55 (1.8)         | ___ <sup>a</sup> | ___ <sup>a</sup> | 41 (1.7)         | ___ <sup>a</sup> | 35 (2.1)         | ___ <sup>a</sup> | 12 (0.9)         | ___ <sup>a</sup> | 12 (2.4)         |
| Infectious Disease (Acute)                                     | No  | 11505 (85)       | 2275 (84)        | 5123 (64.6)      | 1019 (64.3)      | 2815 (52.1)      | 562 (52)         | 1287 (42.6)      | 262 (43.3)       | 934 (39.6)       | 175 (37.1)       | 575 (33.8)       | 114 (33.5)       | 331 (25.4)       | 72 (27.6)        | 270 (25.4)       | 53 (24.9)        | 228 (28.5)       | 48 (30)          | 114 (22.8)       | 25 (25)          |
|                                                                | Yes | 2035 (15)        | 433 (16)         | 2807 (35.4)      | 567 (35.8)       | 2590 (47.9)      | 519 (48)         | 1738 (57.5)      | 343 (56.7)       | 1426 (60.4)      | 297 (62.9)       | 1125 (66.2)      | 226 (66.5)       | 974 (74.6)       | 189 (72.4)       | 795 (74.7)       | 160 (75.1)       | 572 (71.5)       | 112 (70)         | 386 (77.2)       | 75 (75)          |
| Neoplasm (Acute)                                               | No  | 13482 (99.6)     | 2692 (99.4)      | 7843 (98.9)      | 1569 (98.9)      | 5327 (98.6)      | 1068 (98.8)      | 2955 (97.7)      | 589 (97.4)       | 2317 (98.2)      | 463 (98.1)       | 1652 (97.2)      | 330 (97.1)       | 1288 (98.7)      | 257 (98.5)       | 1058 (99.3)      | 211 (99.1)       | 780 (97.5)       | 158 (98.8)       | 496 (99.2)       | 99 (99)          |
|                                                                | Yes | 58 (0.4)         | 16 (0.6)         | 87 (1.1)         | 17 (1.1)         | 78 (1.4)         | 13 (1.2)         | 70 (2.3)         | 16 (2.6)         | 43 (1.8)         | ___ <sup>a</sup> | 48 (2.8)         | ___ <sup>a</sup> | 17 (1.3)         | ___ <sup>a</sup> | ___ <sup>a</sup> | ___ <sup>a</sup> | 20 (2.5)         | ___ <sup>a</sup> | ___ <sup>a</sup> | ___ <sup>a</sup> |
| Endocrine, metabolic, and immunity disorders (Acute)           | No  | 13191 (97.4)     | 2622 (96.8)      | 7456 (94)        | 1490 (94)        | 5038 (93.2)      | 995 (92)         | 2768 (91.5)      | 549 (90.7)       | 2116 (89.7)      | 417 (88.4)       | 1482 (87.2)      | 296 (87.1)       | 1178 (90.3)      | 231 (88.5)       | 915 (85.9)       | 179 (84)         | 677 (84.6)       | 136 (85)         | 431 (86.2)       | 84 (84)          |
|                                                                | Yes | 349 (2.6)        | 86 (3.2)         | 474 (6.4)        | 96 (6.1)         | 367 (6.8)        | 86 (8)           | 257 (8.5)        | 56 (9.3)         | 244 (10.3)       | 55 (11.7)        | 218 (12.8)       | 44 (12.9)        | 127 (9.7)        | 30 (11.5)        | 150 (14.1)       | 34 (16)          | 123 (15.4)       | 24 (15)          | 69 (13.8)        | 16 (16)          |
| Diseases of blood and blood-forming organs (Acute)             | No  | 13309 (98.3)     | 2656 (98.1)      | 7686 (96.9)      | 1534 (96.7)      | 5016 (92.8)      | 999 (92.4)       | 2673 (88.4)      | 535 (88.4)       | 2111 (89.5)      | 414 (87.7)       | 1483 (87.2)      | 295 (86.8)       | 1108 (84.9)      | 216 (82.8)       | 899 (84.4)       | 180 (84.5)       | 652 (81.5)       | 132 (82.5)       | 397 (79.4)       | 81 (81)          |
|                                                                | Yes | 231 (1.7)        | 52 (1.9)         | 244 (3.1)        | 52 (3.3)         | 389 (7.2)        | 82 (7.6)         | 352 (11.6)       | 70 (11.6)        | 249 (10.6)       | 58 (12.3)        | 217 (12.8)       | 45 (13.2)        | 197 (15.1)       | 45 (17.2)        | 166 (15.6)       | 33 (15.5)        | 148 (18.5)       | 28 (17.5)        | 103 (20.6)       | 19 (19)          |
| Diseases of the nervous system and sense organs (Acute)        | No  | 12107 (89.4)     | 2402 (88.7)      | 4703 (59.3)      | 953 (60.1)       | 1929 (35.7)      | 391 (36.2)       | 800 (26.5)       | 168 (27.8)       | 537 (22.8)       | 108 (22.9)       | 290 (17.1)       | 60 (17.7)        | 249 (19.1)       | 54 (20.7)        | 179 (16.8)       | 37 (17.4)        | 150 (18.8)       | 30 (18.8)        | 49 (9.8)         | 13 (13)          |
|                                                                | Yes | 1433 (10.6)      | 306 (11.3)       | 3227 (40.7)      | 633 (39.9)       | 3476 (64.3)      | 690 (63.8)       | 2225 (73.6)      | 437 (72.2)       | 1823 (77.3)      | 364 (77.1)       | 1410 (82.9)      | 280 (82.4)       | 1056 (80.9)      | 207 (79.3)       | 886 (83.2)       | 176 (82.6)       | 650 (81.3)       | 130 (81.3)       | 451 (90.2)       | 87 (87)          |
| Diseases of the circulatory system (Acute)                     | No  | 13460 (99.4)     | 2683 (99.1)      | 7852 (99)        | 1570 (99)        | 5372 (99.4)      | 1072 (99.2)      | 2993 (98.9)      | 599 (99)         | 2319 (98.3)      | 462 (97.9)       | 1676 (98.6)      | 333 (97.9)       | 1281 (98.2)      | 256 (98.1)       | 1052 (98.8)      | 210 (98.6)       | 795 (99.4)       | 159 (99.4)       | 500 (100)        | 100 (100)        |
|                                                                | Yes | 80 (0.6)         | 25 (0.9)         | 78 (1)           | 16 (1)           | 33 (0.6)         | ___ <sup>a</sup> | 32 (1.1)         | ___ <sup>a</sup> | 41 (1.7)         | ___ <sup>a</sup> | 24 (1.4)         | ___ <sup>a</sup> | 24 (1.8)         | ___ <sup>a</sup> | 13 (1.2)         | ___ <sup>a</sup> | ___ <sup>a</sup> | ___ <sup>a</sup> | 0 (0)            | 0 (0)            |
| Diseases of the respiratory system (Acute)                     | No  | 9311 (68.8)      | 1802 (66.5)      | 2074 (26.2)      | 418 (26.4)       | 787 (14.6)       | 162 (15)         | 233 (7.7)        | 44 (7.3)         | 224 (9.5)        | 43 (9.1)         | 88 (5.2)         | 21 (6.2)         | 74 (5.7)         | 17 (6.5)         | 51 (4.8)         | ___ <sup>a</sup> | 48 (6)           | ___ <sup>a</sup> | 17 (3.4)         | ___ <sup>a</sup> |
|                                                                | Yes | 4229 (31.2)      | 906 (33.5)       | 5856 (73.9)      | 1168 (73.6)      | 4618 (85.4)      | 919 (85)         | 2792 (92.3)      | 561 (92.7)       | 2136 (90.5)      | 429 (90.9)       | 1612 (94.8)      | 319 (93.8)       | 1231 (94.3)      | 244 (93.5)       | 1014 (95.2)      | 203 (95.3)       | 752 (94)         | 151 (94.4)       | 483 (96.6)       | 95 (95)          |
| Diseases of the digestive system (Acute)                       | No  | 11594 (85.6)     | 2290 (84.6)      | 5612 (70.8)      | 1138 (71.8)      | 3221 (59.6)      | 642 (59.4)       | 1455 (48.1)      | 298 (49.3)       | 1109 (47)        | 229 (48.5)       | 648 (38.1)       | 136 (40)         | 475 (36.4)       | 94 (36)          | 418 (39.3)       | 83 (39)          | 281 (35.1)       | 57 (35.6)        | 178 (35.6)       | 37 (37)          |
|                                                                | Yes | 1946 (14.4)      | 418 (15.4)       | 2318 (29.2)      | 448 (28.3)       | 2184 (40.4)      | 439 (40.6)       | 1570 (51.9)      | 307 (50.7)       | 1251 (53)        | 243 (51.5)       | 1052 (61.9)      | 204 (60)         | 830 (63.6)       | 167 (64)         | 647 (60.8)       | 130 (61)         | 519 (64.9)       | 103 (64.4)       | 322 (64.4)       | 63 (63)          |
| Diseases of the genitourinary system (Acute)                   | No  | 12853 (94.9)     | 2535 (93.6)      | 6630 (83.6)      | 1324 (83.5)      | 4598 (85.1)      | 907 (83.9)       | 2335 (77.2)      | 473 (78.8)       | 1780 (75.4)      | 365 (77.3)       | 1275 (75)        | 252 (74.1)       | 931 (71.3)       | 194 (74.3)       | 752 (70.6)       | 152 (71.4)       | 533 (66.6)       | 107 (66.9)       | 382 (76.4)       | 73 (73)          |
|                                                                | Yes | 687 (5.1)        | 173 (6.4)        | 1300 (16.4)      | 262 (16.5)       | 807 (14.9)       | 174 (16.1)       | 690 (22.8)       | 132 (21.8)       | 580 (24.6)       | 107 (22.7)       | 425 (25)         | 88 (25.9)        | 374 (28.7)       | 67 (25.7)        | 313 (29.4)       | 61 (28.6)        | 267 (33.4)       | 53 (33.1)        | 119 (23.7)       | 27 (27)          |
| Diseases of the skin and subcutaneous tissue (Acute)           | No  | 11446 (84.5)     | 2269 (83.8)      | 5465 (68.9)      | 1112 (70.1)      | 3118 (57.7)      | 629 (58.2)       | 1575 (52.1)      | 306 (50.6)       | 1022 (43.3)      | 211 (44.7)       | 686 (40.4)       | 140 (41.2)       | 505 (38.7)       | 103 (39.5)       | 371 (34.8)       | 73 (34.3)        | 322 (40.3)       | 69 (43.1)        | 201 (40.2)       | 40 (40)          |
|                                                                | Yes | 2094 (15.5)      | 439 (16.2)       | 2465 (31.1)      | 474 (29.9)       | 2287 (42.3)      | 452 (41.8)       | 1450 (47.9)      | 299 (49.4)       | 1338 (56.7)      | 261 (55.3)       | 1014 (59.7)      | 200 (58.8)       | 800 (61.3)       | 158 (60.5)       | 694 (65.2)       | 140 (65.7)       | 478 (59.8)       | 91 (56.9)        | 299 (59.8)       | 60 (60)          |
| Diseases of the musculoskeletal system (Acute)                 | No  | 13426 (99.2)     | 2685 (99.2)      | 7774 (98)        | 1552 (97.9)      | 5097 (94.3)      | 1019 (94.3)      | 2818 (93.2)      | 560 (92.6)       | 2158 (91.4)      | 426 (90.3)       | 1525 (89.7)      | 303 (89.1)       | 1142 (87.5)      | 226 (86.6)       | 885 (83.1)       | 180 (84.5)       | 637 (79.6)       | 130 (81.3)       | 424 (84.8)       | 84 (84)          |
|                                                                | Yes | 114 (0.8)        | 23 (0.9)         | 156 (2)          | 34 (2.1)         | 308 (5.7)        | 62 (5.7)         | 207 (6.8)        | 45 (7.4)         | 202 (8.6)        | 46 (8.0)         | 175 (10.3)       | 37 (10.9)        | 163 (12.5)       | 35 (13.4)        | 180 (16.9)       | 33 (15.5)        | 163 (20.4)       | 30 (18.8)        | 76 (15.2)        | 16 (16)          |
| Congenital anomalies                                           | No  | 11869 (87.7)     | 2346 (86.6)      | 6341 (80)        | 1250 (78.8)      | 4250 (78.6)      | 846 (78.3)       | 2442 (80.7)      | 478 (79)         | 1931 (81.8)      | 380 (80.5)       | 1321 (77.7)      | 257 (75.6)       | 1010 (77.4)      | 197 (75.5)       | 847 (79.5)       | 168 (78.9)       | 645 (80.6)       | 125 (78.1)       | 450 (90)         | 89 (89)          |
|                                                                | Yes | 1671 (12.3)      | 362 (13.4)       | 1589 (20)        | 336 (21.2)       | 1155 (21.4)      | 235 (21.7)       | 583 (19.3)       | 127 (21)         | 429 (18.2)       | 92 (19.5)        | 379 (22.3)       | 83 (24.4)        | 295 (22.6)       | 64 (24.5)        | 218 (20.5)       | 45 (21.1)        | 155 (19.4)       | 35 (21.9)        | 50 (10)          | 11 (11)          |
| Certain conditions originating in the perinatal period (Acute) | No  | 5133 (37.9)      | 1020 (37.7)      | 2735 (34.5)      | 535 (33.7)       | 2078 (38.5)      | 403 (37.3)       | 1118 (37)        | 219 (36.2)       | 921 (39)         | 187 (39.6)       | 661 (38.9)       | 127 (37.4)       | 533 (40.8)       | 110 (42.2)       | 505 (47.4)       | 97 (45.5)        | 446 (55.8)       | 79 (49.4)        | 184 (36.8)       | 41 (41)          |
|                                                                | Yes | 8407 (62.1)      | 1688 (62.3)      | 5195 (65.5)      | 1051 (66.3)      | 3327 (61.6)      | 678 (62.7)       | 1907 (63)        | 386 (63.8)       | 1439 (61)        | 285 (60.4)       | 1039 (61.1)      | 213 (62.7)       | 772 (59.2)       | 151 (57.9)       | 560 (52.6)       | 116 (54.5)       | 354 (44.3)       | 81 (50.6)        | 316 (63.2)       | 59 (59)          |
| Injury and poisoning (Acute)                                   | No  | 12958 (95.7)     | 2588 (95.6)      | 7120 (89.8)      | 1423 (89.7)      | 4060 (75.1)      | 819 (75.8)       | 1979 (65.4)      | 406 (67.1)       | 1272 (53.9)      | 255 (54)         | 851 (50.1)       | 171 (50.3)       | 622 (47.7)       | 125 (47.9)       | 433 (40.7)       | 94 (44.1)        | 293 (36.6)       | 55 (34.4)        | 162 (32.4)       | 33 (33)          |
|                                                                | Yes | 582 (4.3)        | 120 (4.4)        | 810 (10.2)       | 163 (10.3)       | 1345 (24.9)      | 262 (24.2)       | 1046 (34.6)      | 199 (32.9)       | 1088 (46.1)      | 217 (46)         | 849 (49.9)       | 169 (49.7)       | 683 (52.3)       | 136 (52.1)       | 632 (59.3)       | 119 (55.9)       | 507 (63.4)       | 105 (65.6)       | 338 (67.6)       | 67 (67)          |
| Infectious Disease (Chronic)                                   | No  | 13532 (99.9)     | 2706 (99.9)      | 7927 (100)       | 1585 (99.9)      | 5397 (99.9)      | 1079 (99.8)      | 3025 (100)       | 605 (100)        | 2358 (99.9)      | 471 (99.8)       | 1700 (100)       | 340 (100)        | 1305 (100)       | 261 (100)        | 1065 (100)       | 213 (100)        | 800 (100)        | 160 (100)        | 500 (100)        | 100 (100)        |
|                                                                | Yes | ___ <sup>a</sup> | 0 (0)            | 0 (0)            | ___ <sup>a</sup> | ___ <sup>a</sup> | 0 (0)            | 0 (0)            | 0 (0)            | 0 (0)            | 0 (0)            | 0 (0)            | 0 (0)            | 0 (0)            | 0 (0)            | 0 (0)            |
| Neoplasm (Chronic)                                             | No  | 13533 (100)      | 2707 (100)       | 7918 (99.9)      | 1584 (99.9)      | 5402 (99.9)      | 1080 (99.9)      | 3022 (99.9)      | 604 (99.8)       | 2357 (99.9)      | 471 (99.8)       | 1700 (100)       | 340 (100)        | 1305 (100)       | 261 (100)        | 1065 (100)       | 213 (100)        | 798 (99.8)       | 159 (99.4)       | 492 (98.4)       | 98 (98)          |
|                                                                | Yes | ___ <sup>a</sup> | ___ <sup>a</sup> | 12 (0.2)         | ___ <sup>a</sup> | 0 (0)            | 0 (0)            | 0 (0)            | 0 (0)            | 0 (0)            | 0 (0)            | ___ <sup>a</sup> | ___ <sup>a</sup> | ___ <sup>a</sup> | ___ <sup>a</sup> |
| Endocrine, metabolic, and immunity disorders (Chronic)         | No  | 13155 (97.2)     | 2628 (97.1)      | 7649 (96.5)      | 1523 (96)        | 5119 (94.7)      | 1024 (94.7)      | 2874 (95)        | 573 (94.7)       | 2253 (95.5)      | 447 (94.7)       | 1622 (95.4)      | 320 (94.1)       | 1254 (96.1)      | 251 (96.2)       | 1015 (95.3)      | 201 (94.4)       | 755 (94.4)       | 150 (93.8)       | 464 (92.8)       | 93 (93)          |
|                                                                | Yes | 385 (2.8)        | 80 (3)           | 281 (3.5)        | 63 (4)           | 286 (5.3)        | 57 (5.3)         | 151 (5)          | 32 (5.3)         | 107 (4.5)        | 25 (5.3)         | 78 (4.6)         | 20 (5.9)         | 51 (3.9)         | ___ <sup>a</sup> | 50 (4.7)         | 12 (5.6)         | 45 (5.6)         | ___ <sup>a</sup> | 36 (7.2)         | ___ <sup>a</sup> |
| Diseases of blood and blood-forming organs (Chronic)           | No  | 13346 (98.6)     | 2664 (98.4)      | 7764 (97.9)      | 1543 (97.3)      | 5208 (96.4)      | 1034 (95.7)      | 2876 (95.1)      | 573 (94.7)       | 2234 (94.7)      | 444 (94.1)       | 1601 (94.2)      | 319 (93.8)       | 1228 (94.1)      | 242 (92.7)       | 992 (93.2)       | 199 (93.4)       | 719 (89.9)       | 144 (90)         | 474 (94.8)       | 95 (95)          |
|                                                                | Yes | 194 (1.4)        | 44 (1.6)         | 166 (2.1)        | 43 (2.7)         | 197 (3.6)        | 47 (4.4)         | 149 (4.9)        | 32 (5.3)         | 126 (5.3)        | 28 (5.9)         | 99 (5.8)         | 21 (6.2)         | 77 (5.9)         | 19 (7.3)         | 73 (6.9)         | 14 (6.6)         | 81 (10.1)        | 16 (10)          | 26 (5.2)         | ___ <sup>a</sup> |
| Diseases of the nervous system and sense organs (Chronic)      | No  | 13090 (96.7)     | 2604 (96.2)      | 7422 (93.6)      | 1479 (93.3)      | 4847 (89.7)      | 971 (89.8)       | 2820 (93.2)      | 557 (92.1)       | 2103 (89.1)      | 416 (88.1)       | 1518 (89.3)      | 303 (89.1)       | 1076 (82.5)      | 218 (83.5)       | 976 (91.6)       | 194 (91.1)       | 672 (84)         | 136 (85)         | 448 (89.6)       | 89 (89)          |
|                                                                | Yes | 450 (3.3)        | 104 (3.8)        | 508 (6.4)        | 107 (6.8)        | 558 (10.3)       | 110 (10.2)       | 205 (6.8)        | 48 (7.9)         | 257 (10.9)       | 56 (11.9)        | 182 (10.7)       | 37 (10.9)        | 229 (17.6)       | 43 (16.5)        | 89 (8.4)         | 19 (8.9)         | 128 (16)         | 24 (15)          | 52 (10.4)        | 11 (11)          |
| Diseases of the circulatory system (Chronic)                   | No  | 13302 (98.2)     | 2652 (97.9)      | 7672 (96.8)      | 1530 (96.5)      | 5199 (96.2)      | 1033 (95.6)      | 2898 (95.8)      | 577 (95.4)       | 2257 (95.6)      | 450 (95.3)       | 1614 (94.9)      | 326 (95.9)       | 1250 (95.8)      | 247 (94.6)       | 1041 (97.8)      | 208 (97.7)       | 755 (94.4)       | 149 (93.1)       | 441 (88.2)       | 90 (90)          |
|                                                                | Yes | 238 (1.8)        | 56 (2.1)         | 258 (3.3)        | 56 (3.5)         | 206 (3.8)        | 48 (4.4)         | 127 (4.2)        | 28 (4.6)         | 103 (4.4)        | 22 (4.7)         | 86 (5.1)         | 14 (4.1)         | 55 (4.2)         | 14 (5.4)         | 24 (2.3)         | ___ <sup>a</sup> | 45 (5.6)         | 11 (6.9)         | 59 (11.8)        | ___ <sup>a</sup> |
| Diseases of the respiratory system (Chronic)                   | No  | 12848 (94.9)     | 2555 (94.4)      | 6299 (79.4)      | 1270 (8          |                  |                  |                  |                  |                  |                  |                  |                  |                  |                  |                  |                  |                  |                  |                  |                  |

**Table 8: Characteristics of TX Tonsillectomy and/or Adenoidectomy Matched Cohorts by Age at Exposure**

|                                                          |            | >6 months - ≤1 yr |             | >1 yr - ≤1.5 yrs |             | >1.5 yrs - ≤2 yrs |             | >2 yrs - ≤2.5 yrs |             | >2.5 yrs - ≤3 yrs |             | >3 yrs - ≤3.5 yrs |             | >3.5 yrs - ≤4 yrs |             | >4 yrs - ≤4.5 yrs |             | >4.5 yrs - ≤5 yrs |             |
|----------------------------------------------------------|------------|-------------------|-------------|------------------|-------------|-------------------|-------------|-------------------|-------------|-------------------|-------------|-------------------|-------------|-------------------|-------------|-------------------|-------------|-------------------|-------------|
|                                                          |            | Exposure          |             | Exposure         |             | Exposure          |             | Exposure          |             | Exposure          |             | Exposure          |             | Exposure          |             | Exposure          |             | Exposure          |             |
|                                                          |            | No<br>n(%)        | Yes<br>n(%) | No<br>n(%)       | Yes<br>n(%) | No<br>n(%)        | Yes<br>n(%) | No<br>n(%)        | Yes<br>n(%) | No<br>n(%)        | Yes<br>n(%) | No<br>n(%)        | Yes<br>n(%) | No<br>n(%)        | Yes<br>n(%) | No<br>n(%)        | Yes<br>n(%) | No<br>n(%)        | Yes<br>n(%) |
| Sex                                                      | Female     | 460 (36.2)        | 87 (34.3)   | 1908 (40.6)      | 373 (39.7)  | 2879 (42.3)       | 557 (40.9)  | 3025 (41.6)       | 623 (42.9)  | 2838 (42.3)       | 567 (42.2)  | 3378 (46.5)       | 668 (46)    | 3072 (49)         | 616 (49.2)  | 2918 (47.1)       | 583 (47.1)  | 2743 (50.7)       | 564 (52.1)  |
|                                                          | Male       | 810 (63.8)        | 167 (65.8)  | 2792 (59.4)      | 567 (60.3)  | 3931 (57.7)       | 805 (59.1)  | 4240 (58.4)       | 830 (57.1)  | 3877 (57.7)       | 776 (57.8)  | 3887 (53.5)       | 785 (54)    | 3193 (51)         | 637 (50.8)  | 3277 (52.9)       | 656 (53)    | 2667 (49.3)       | 518 (47.9)  |
| Race                                                     | White      | 541 (42.6)        | 111 (43.7)  | 1804 (38.4)      | 356 (37.9)  | 2564 (37.7)       | 518 (38)    | 2073 (28.5)       | 430 (29.6)  | 2033 (30.3)       | 402 (29.9)  | 1672 (23)         | 335 (23.1)  | 1293 (20.6)       | 253 (20.2)  | 1200 (19.4)       | 242 (19.5)  | 1071 (19.8)       | 225 (20.8)  |
|                                                          | Black      | 238 (18.7)        | 41 (16.1)   | 741 (15.8)       | 150 (16)    | 917 (13.5)        | 187 (13.7)  | 1008 (13.9)       | 209 (14.4)  | 833 (12.4)        | 157 (11.7)  | 759 (10.5)        | 158 (10.9)  | 607 (9.7)         | 128 (10.2)  | 640 (10.3)        | 129 (10.4)  | 464 (8.6)         | 99 (9.2)    |
|                                                          | Hispanic   | 476 (37.5)        | 99 (39)     | 2012 (42.8)      | 406 (43.2)  | 3121 (45.8)       | 613 (45)    | 4056 (55.8)       | 785 (54)    | 3706 (55.2)       | 753 (56.1)  | 4774 (65.7)       | 946 (65.1)  | 4304 (68.7)       | 860 (68.6)  | 4304 (69.5)       | 855 (69)    | 3846 (71.1)       | 753 (69.6)  |
|                                                          | Other      | 15 (1.2)          | 0           | 143 (3)          | 28 (3)      | 208 (3.1)         | 44 (3.2)    | 128 (1.8)         | 29 (2)      | 143 (2.1)         | 31 (2.3)    | 60 (0.8)          | 14 (1)      | 61 (1)            | 12 (1)      | 51 (0.8)          | 13 (1.1)    | 29 (0.5)          | 0           |
| Income Based on ZIP Code of Residence (quartile)         | Quartile 1 | 212 (16.7)        | 44 (17.3)   | 1050 (22.3)      | 202 (21.5)  | 1303 (19.1)       | 267 (19.6)  | 1824 (25.1)       | 357 (24.6)  | 1524 (22.7)       | 314 (23.4)  | 2078 (28.6)       | 400 (27.5)  | 1755 (28)         | 346 (27.6)  | 1736 (28)         | 341 (27.5)  | 1456 (26.9)       | 292 (27)    |
|                                                          | Quartile 2 | 339 (26.7)        | 68 (26.8)   | 1094 (23.3)      | 221 (23.5)  | 2010 (29.5)       | 393 (28.9)  | 1753 (24.1)       | 335 (23.1)  | 1854 (27.6)       | 359 (26.7)  | 1835 (25.3)       | 383 (26.4)  | 1821 (29.1)       | 362 (28.9)  | 1746 (28.2)       | 345 (27.9)  | 1509 (27.9)       | 308 (28.5)  |
|                                                          | Quartile 3 | 329 (25.9)        | 70 (27.6)   | 1333 (28.4)      | 270 (28.7)  | 1886 (27.7)       | 385 (28.3)  | 2066 (28.4)       | 422 (29)    | 1862 (27.7)       | 370 (27.6)  | 1913 (26.3)       | 368 (25.8)  | 1578 (25.2)       | 313 (25)    | 1674 (27)         | 332 (26.8)  | 1506 (27.8)       | 295 (27.3)  |
|                                                          | Quartile 4 | 390 (30.7)        | 72 (28.4)   | 1223 (26)        | 247 (26.3)  | 1611 (23.7)       | 317 (23.3)  | 1622 (22.3)       | 339 (23.3)  | 1475 (22)         | 400 (23.6)  | 1439 (19.8)       | 302 (20.3)  | 1111 (17.7)       | 232 (18.5)  | 1039 (16.8)       | 221 (17.8)  | 939 (17.4)        | 187 (17.3)  |
| Number of Outpatient Visits (quartile)                   | Quartile 1 | 25 (2)            | 0           | 107 (2.3)        | 23 (2.5)    | 113 (1.7)         | 26 (1.9)    | 205 (2.8)         | 42 (2.9)    | 256 (3.7)         | 39 (3.7)    | 256 (3.5)         | 60 (4.1)    | 399 (6.4)         | 81 (6.5)    | 280 (4.5)         | 62 (5)      | 347 (6.4)         | 84 (7.8)    |
|                                                          | Quartile 2 | 87 (6.9)          | 14 (5.5)    | 345 (7.3)        | 74 (7.9)    | 734 (10.8)        | 156 (11.5)  | 840 (11.6)        | 166 (11.4)  | 1155 (17.2)       | 231 (17.2)  | 1110 (15.3)       | 226 (15.6)  | 999 (16)          | 192 (15.3)  | 1162 (18.8)       | 224 (18.1)  | 933 (17.3)        | 191 (17.7)  |
|                                                          | Quartile 3 | 274 (21.6)        | 56 (22.1)   | 810 (17.2)       | 163 (17.3)  | 1552 (22.8)       | 301 (22.1)  | 1902 (26.2)       | 376 (25.9)  | 1615 (24.1)       | 317 (23.6)  | 1995 (27.5)       | 394 (27.1)  | 1684 (26.9)       | 337 (26.9)  | 1689 (27.3)       | 344 (27.8)  | 1581 (29.2)       | 299 (27.6)  |
|                                                          | Quartile 4 | 884 (69.6)        | 180 (70.9)  | 3438 (73.2)      | 680 (72.3)  | 4411 (64.8)       | 879 (64.5)  | 4318 (59.4)       | 869 (59.8)  | 3699 (55.1)       | 746 (55.6)  | 3904 (53.7)       | 773 (53.2)  | 3183 (50.8)       | 643 (51.3)  | 3064 (49.5)       | 609 (49.2)  | 2549 (47.1)       | 508 (47)    |
| Total Number of Inpatient Stays (n)                      | 0          | 0 (0)             | 0 (0)       | 0 (0)            | 0 (0)       | 0 (0)             | 0 (0)       | 0 (0)             | 0 (0)       | 0 (0)             | 0 (0)       | 0 (0)             | 0 (0)       | 0 (0)             | 0 (0)       | 0 (0)             | 0 (0)       | 0 (0)             | 0 (0)       |
|                                                          | 1          | 978 (77)          | 187 (73.6)  | 3356 (71.4)      | 663 (70.5)  | 4930 (72.4)       | 988 (72.5)  | 5165 (71.1)       | 1033 (71.1) | 4825 (71.9)       | 947 (70.5)  | 5128 (70.6)       | 1011 (69.6) | 4315 (68.9)       | 866 (69.1)  | 4410 (71.2)       | 868 (70.1)  | 3665 (67.7)       | 729 (67.4)  |
|                                                          | 2          | 229 (18)          | 50 (19.7)   | 992 (21.1)       | 203 (21.6)  | 1301 (19.1)       | 253 (18.6)  | 1402 (19.3)       | 281 (19.3)  | 1261 (18.8)       | 259 (19.3)  | 1458 (20.1)       | 305 (21)    | 1290 (20.6)       | 253 (20.2)  | 1133 (18.3)       | 234 (18.9)  | 1174 (21.7)       | 233 (21.5)  |
|                                                          | 3 or more  | 63 (5)            | 17 (6.7)    | 352 (7.5)        | 74 (7.9)    | 579 (8.5)         | 121 (8.9)   | 698 (9.6)         | 139 (9.6)   | 629 (9.4)         | 137 (10.2)  | 679 (9.4)         | 137 (9.4)   | 660 (10.5)        | 134 (10.7)  | 652 (10.5)        | 137 (11.1)  | 571 (10.6)        | 120 (11.1)  |
| <36 Weeks Gestational Age                                | No         | 1183 (93.2)       | 236 (92.9)  | 4380 (93.2)      | 871 (92.7)  | 6377 (93.6)       | 1267 (93)   | 6865 (94.5)       | 1368 (94.2) | 6367 (94.8)       | 1269 (94.5) | 6908 (95.1)       | 1372 (94.4) | 5978 (95.4)       | 1192 (95.1) | 5971 (96.4)       | 1193 (96.3) | 5141 (95)         | 1025 (94.7) |
|                                                          | Yes        | 87 (6.9)          | 18 (7.1)    | 320 (6.8)        | 69 (7.3)    | 433 (6.4)         | 95 (7)      | 400 (5.5)         | 85 (5.9)    | 348 (5.2)         | 74 (5.5)    | 357 (4.9)         | 81 (5.6)    | 287 (4.6)         | 61 (4.9)    | 224 (3.6)         | 46 (3.7)    | 269 (5)           | 57 (5.3)    |
| Low Birth Weight (<2500g and ≥1500g)                     | No         | 1199 (94.4)       | 242 (95.3)  | 4443 (94.5)      | 889 (94.6)  | 6487 (95.3)       | 1294 (95)   | 6893 (94.9)       | 1372 (94.4) | 6409 (95.4)       | 1281 (95.4) | 6960 (95.8)       | 1388 (95.5) | 6006 (95.9)       | 1200 (95.8) | 5973 (96.4)       | 1190 (96.1) | 5178 (95.7)       | 1028 (95)   |
|                                                          | Yes        | 71 (5.6)          | 12 (4.7)    | 257 (5.5)        | 51 (5.4)    | 323 (4.7)         | 68 (5)      | 372 (5.1)         | 81 (5.6)    | 306 (4.6)         | 62 (4.6)    | 305 (4.2)         | 65 (4.5)    | 259 (4.1)         | 53 (4.2)    | 222 (3.6)         | 49 (4)      | 232 (4.3)         | 54 (5)      |
| Very Low Birth Weight (<1500g and ≥1000g)                | No         | 1270 (100)        | 254 (100)   | 4673 (99.4)      | 934 (99.4)  | 6763 (99.3)       | 1350 (99.1) | 7208 (99.2)       | 1440 (99.1) | 6662 (99.2)       | 1331 (99.1) | 7192 (99)         | 1437 (98.9) | 6250 (99.8)       | 1249 (99.7) | 6134 (99)         | 1228 (99.1) | 5371 (99.3)       | 1075 (99.4) |
|                                                          | Yes        | 0 (0)             | 0 (0)       | 27 (0.6)         | 0           | 47 (0.7)          | 12 (0.9)    | 57 (0.8)          | 13 (0.9)    | 53 (0.8)          | 12 (0.9)    | 73 (1)            | 16 (1.1)    | 15 (0.2)          | 0           | 61 (1)            | 11 (0.9)    | 39 (0.7)          | 0           |
| Extremely Low Birth Weight (<1000g)                      | No         | 1270 (100)        | 254 (100)   | 4698 (100)       | 939 (99.9)  | 6788 (99.7)       | 1356 (99.6) | 7234 (99.6)       | 1446 (99.5) | 6690 (99.6)       | 1338 (99.6) | 7243 (99.7)       | 1447 (99.6) | 6214 (99.2)       | 1243 (99.2) | 6173 (99.6)       | 1234 (99.6) | 5390 (99.6)       | 1078 (99.6) |
|                                                          | Yes        | 0 (0)             | 0 (0)       | 0                | 0           | 22 (0.3)          | 0           | 31 (0.4)          | 0           | 25 (0.4)          | 0           | 22 (0.3)          | 0           | 51 (0.8)          | 0           | 22 (0.4)          | 0           | 20 (0.4)          | 0           |
| Chromosomal Anomalies                                    | No         | 1261 (99.3)       | 252 (99.2)  | 4690 (99.8)      | 937 (99.7)  | 6792 (99.7)       | 1359 (99.8) | 7238 (99.6)       | 1449 (99.7) | 6688 (99.6)       | 1337 (99.6) | 7249 (99.8)       | 1450 (99.8) | 6225 (99.4)       | 1244 (99.3) | 6176 (99.7)       | 1235 (99.7) | 5396 (99.7)       | 1077 (99.5) |
|                                                          | Yes        | 0                 | 0           | 0                | 0           | 18 (0.3)          | 0           | 27 (0.4)          | 0           | 27 (0.4)          | 0           | 16 (0.2)          | 0           | 40 (0.6)          | 0           | 19 (0.3)          | 0           | 14 (0.3)          | 0           |
| Congenital Anomalies of the Heart and Circulatory System | No         | 1207 (95)         | 243 (95.7)  | 4548 (96.8)      | 908 (96.6)  | 6491 (95.3)       | 1298 (95.3) | 6980 (96.1)       | 1396 (96.1) | 6449 (96)         | 1282 (95.5) | 6928 (95.4)       | 1377 (94.8) | 6044 (96.5)       | 1201 (95.9) | 6060 (97.8)       | 1208 (97.5) | 5244 (96.9)       | 1046 (96.7) |
|                                                          | Yes        | 63 (5)            | 11 (4.3)    | 152 (3.2)        | 32 (3.4)    | 319 (4.7)         | 64 (4.7)    | 285 (3.9)         | 57 (3.9)    | 266 (4)           | 61 (4.5)    | 337 (4.6)         | 76 (5.2)    | 221 (3.5)         | 52 (4.2)    | 135 (2.2)         | 31 (2.5)    | 166 (3.1)         | 36 (3.3)    |
| Congenital Anomalies of the Central Nervous System       | No         | 1259 (99.1)       | 252 (99.2)  | 4673 (99.4)      | 934 (99.4)  | 6780 (99.6)       | 1357 (99.6) | 7239 (99.6)       | 1449 (99.7) | 6682 (99.5)       | 1336 (99.5) | 7240 (99.7)       | 1448 (99.7) | 6250 (99.8)       | 1249 (99.7) | 6191 (99.9)       | 1238 (99.9) | 5403 (99.9)       | 1080 (99.8) |
|                                                          | Yes        | 11 (0.9)          | 0           | 27 (0.6)         | 0           | 30 (0.4)          | 0           | 26 (0.4)          | 0           | 33 (0.5)          | 0           | 25 (0.3)          | 0           | 15 (0.2)          | 0           | 0                 | 0           | 0                 | 0           |
| Congenital Anomalies of the Eye                          | No         | 1257 (99)         | 253 (99.6)  | 4685 (99.7)      | 937 (99.7)  | 6780 (99.6)       | 1356 (99.6) | 7237 (99.6)       | 1448 (99.7) | 6685 (99.6)       | 1337 (99.6) | 7239 (99.6)       | 1448 (99.7) | 6250 (99.8)       | 1247 (99.5) | 6164 (99.5)       | 1232 (99.4) | 5401 (99.8)       | 1080 (99.8) |
|                                                          | Yes        | 13 (1)            | 0           | 15 (0.3)         | 0           | 30 (0.4)          | 0           | 28 (0.4)          | 0           | 30 (0.5)          | 0           | 26 (0.4)          | 0           | 15 (0.2)          | 0           | 31 (0.5)          | 0           | 0                 | 0           |
| Congenital Anomalies of the Genital Organs               | No         | 1259 (99.1)       | 251 (98.8)  | 4676 (99.5)      | 934 (99.4)  | 6782 (99.6)       | 1356 (99.6) | 7244 (99.7)       | 1450 (99.8) | 6685 (99.6)       | 1337 (99.6) | 7234 (99.6)       | 1447 (99.6) | 6252 (99.8)       | 1250 (99.8) | 6179 (99.7)       | 1236 (99.8) | 5385 (99.5)       | 1077 (99.5) |
|                                                          | Yes        | 11 (0.9)          | 0           | 24 (0.5)         | 0           | 28 (0.4)          | 0           | 21 (0.3)          | 0           | 30 (0.5)          | 0           | 31 (0.4)          | 0           | 13 (0.2)          | 0           | 16 (0.3)          | 0           | 25 (0.5)          | 0           |
| Congenital Anomalies of the Digestive System             | No         | 1258 (99.1)       | 252 (99.2)  | 4686 (99.7)      | 937 (99.7)  | 6747 (99.1)       | 1350 (99.1) | 7224 (99.4)       | 1445 (99.5) | 6691 (99.6)       | 1338 (99.6) | 7239 (99.6)       | 1448 (99.7) | 6251 (99.8)       | 1250 (99.8) | 6161 (99.5)       | 1231 (99.4) | 5394 (99.7)       | 1079 (99.7) |
|                                                          | Yes        | 12 (0.9)          | 0           | 14 (0.3)         | 0           | 63 (0.9)          | 12 (0.9)    | 41 (0.6)          | 0           | 24 (0.4)          | 0           | 26 (0.4)          | 0           | 14 (0.2)          | 0           | 34 (0.6)          | 0           | 16 (0.3)          | 0           |
| Congenital Musculoskeletal Deformities                   | No         | 1249 (98.4)       | 251 (98.8)  | 4621 (98.3)      | 922 (98.1)  | 6680 (98.1)       | 1337 (98.2) | 7189 (99)         | 1434 (98.7) | 6644 (98.9)       | 1326 (98.7) | 7211 (99.3)       | 1440 (99.1) | 6148 (98.1)       | 1227 (97.9) | 6115 (98.7)       | 1220 (98.5) | 5380 (99.5)       | 1074 (99.3) |
|                                                          | Yes        | 21 (1.7)          | 0           | 79 (1.7)         | 18 (1.9)    | 130 (1.9)         | 25 (1.8)    | 76 (1.1)          | 19 (1.3)    | 71 (1.1)          | 17 (1.3)    | 54 (0.7)          | 13 (0.9)    | 117 (1.9)         | 26 (2.1)    | 80 (1.3)          | 19 (1.5)    | 30 (0.6)          | 0           |
| Other Congenital Anomalies                               | No         | 1270 (100)        | 254 (100)   | 4676 (99.5)      | 934 (99.4)  | 6785 (99.6)       | 1357 (99.6) | 7261 (99.9)       | 1452 (99.9) | 6704 (99.8)       | 1341 (99.9) | 7252 (99.8)       | 1450 (99.8) | 6252 (99.8)       | 1251 (99.8) | 6195 (100)        | 1239 (100)  | 5407 (99.9)       | 1081 (99.9) |
|                                                          | Yes        | 0 (0)             | 0 (0)       | 24 (0.5)         | 0           | 25 (0.4)          | 0           | 0                 | 0           | 11 (0.2)          | 0           | 13 (0.2)          | 0           | 13 (0.2)          | 0           | 0 (0)             | 0 (0)       | 0                 | 0           |
| Congenital Anomalies of the Respiratory System           | No         | 1270 (100)        | 254 (100)   | 4687 (99.7)      | 937 (99.7)  | 6789 (99.7)       | 1358 (99.7) | 7245 (99.7)       | 1447 (99.6) | 6693 (99.7)       | 1337 (99.6) | 7263 (100)        | 1452 (99.9) | 6257 (99.9)       | 1251 (99.8) | 6187 (99.9)       | 1236 (99.8) | 5387 (99.6)       | 1078 (99.6) |
|                                                          | Yes        | 0 (0)             | 0 (0)       | 13 (0.3)         | 0           | 21 (0.3)          | 0           | 20 (0.3)          | 0           | 22 (0.3)          | 0           | 0                 | 0           | 8 (0.1)           | 0           | 0                 | 0           | 23 (0.4)          | 0           |
| Congenital Anomalies of the Skin                         | No         | 1259 (99.1)       | 252 (99.2)  | 4654 (99)        | 933 (99.3)  | 6779 (99.5)       | 1355 (99.5) | 7242 (99.7)       | 1446 (99.5) | 6632 (98.8)       | 1329 (99)   | 7227 (99.5)       | 1443 (99.3) | 6226 (99.4)       | 1243 (99.2) | 6181 (99.8)       | 1236 (99.8) | 5382 (99.5)       | 1076 (99.5) |
|                                                          | Yes        | 11 (0.9)          | 0           | 46 (1)           | 0           | 31 (0.5)          | 0           | 23 (0.3)          | 0           | 83 (1.2)          | 14 (1)      | 38 (0.5)          | 0           | 39 (0.6)          | 0           | 14 (0.2)          | 0           | 28 (0.5)          | 0           |
| Congenital Anomalies of the Urinary System               | No         | 1265 (99.6)       | 253 (99.6)  | 4671 (99.4)      | 936 (99.6)  | 6765 (99.3)       | 1352 (      |                   |             |                   |             |                   |             |                   |             |                   |             |                   |             |

|                                                                |     |             |                  |                  |                  |                  |                  |                  |                  |                  |                  |                  |                  |                  |                  |                  |                  |             |                  |
|----------------------------------------------------------------|-----|-------------|------------------|------------------|------------------|------------------|------------------|------------------|------------------|------------------|------------------|------------------|------------------|------------------|------------------|------------------|------------------|-------------|------------------|
| Intrauterine Placental Insufficiency                           | No  | 1253 (98.7) | 250 (98.4)       | 4647 (98.9)      | 930 (98.9)       | 6734 (98.9)      | 1345 (98.8)      | 7225 (99.5)      | 1443 (99.3)      | 6622 (98.6)      | 1322 (98.4)      | 7188 (98.9)      | 1435 (98.8)      | 6183 (98.7)      | 1236 (98.6)      | 6119 (98.8)      | 1224 (98.8)      | 5325 (98.4) | 1061 (98.1)      |
|                                                                | Yes | 17 (1.3)    | ___ <sup>o</sup> | 53 (1.1)         | ___ <sup>o</sup> | 76 (1.1)         | 17 (1.3)         | 40 (0.6)         | ___ <sup>o</sup> | 93 (1.4)         | 21 (1.6)         | 77 (1.1)         | 18 (1.2)         | 82 (1.3)         | 17 (1.4)         | 76 (1.2)         | 15 (1.2)         | 85 (1.6)    | 21 (1.9)         |
| Infectious Disease (Acute)                                     | No  | 617 (48.6)  | 115 (45.3)       | 1957 (41.6)      | 388 (41.3)       | 2598 (38.2)      | 530 (38.9)       | 2336 (32.2)      | 473 (32.6)       | 2001 (29.8)      | 403 (30)         | 2075 (28.6)      | 424 (29.2)       | 1675 (26.7)      | 358 (28.6)       | 1382 (22.3)      | 302 (24.4)       | 1123 (20.8) | 240 (22.2)       |
|                                                                | Yes | 653 (51.4)  | 139 (54.7)       | 2743 (58.4)      | 552 (58.7)       | 4212 (61.9)      | 832 (61.1)       | 4929 (67.9)      | 980 (67.5)       | 4714 (70.2)      | 940 (70)         | 5190 (71.4)      | 1029 (70.8)      | 4590 (73.3)      | 895 (71.4)       | 4813 (77.7)      | 937 (75.6)       | 4287 (79.2) | 842 (77.8)       |
| Neoplasm (Acute)                                               | No  | 1252 (98.6) | 251 (98.8)       | 4630 (98.5)      | 925 (98.4)       | 6698 (98.4)      | 1333 (97.9)      | 7145 (98.4)      | 1429 (98.4)      | 6603 (98.3)      | 1316 (98)        | 7128 (98.1)      | 1422 (97.9)      | 6144 (98.1)      | 1222 (97.5)      | 6043 (97.6)      | 1206 (97.3)      | 5312 (98.2) | 1057 (97.7)      |
|                                                                | Yes | 18 (1.4)    | ___ <sup>o</sup> | 70 (1.5)         | 15 (1.6)         | 112 (1.6)        | 29 (2.1)         | 120 (1.7)        | 24 (1.7)         | 112 (1.7)        | 27 (2)           | 137 (1.9)        | 31 (2.1)         | 121 (1.9)        | 31 (2.5)         | 152 (2.5)        | 33 (2.7)         | 98 (1.8)    | 25 (2.3)         |
| Endocrine, metabolic, and immunity disorders (Acute)           | No  | 1147 (90.3) | 230 (90.6)       | 4289 (91.3)      | 850 (90.4)       | 6069 (89.1)      | 1205 (88.5)      | 6345 (87.3)      | 1258 (86.6)      | 5838 (86.9)      | 1154 (85.9)      | 6380 (87.8)      | 1255 (86.4)      | 5217 (83.3)      | 1050 (83.8)      | 5396 (87.1)      | 1069 (86.3)      | 4586 (84.8) | 913 (84.4)       |
|                                                                | Yes | 123 (9.7)   | 24 (9.5)         | 411 (8.7)        | 90 (9.6)         | 741 (10.9)       | 157 (11.5)       | 920 (12.7)       | 195 (13.4)       | 877 (13.1)       | 189 (14.1)       | 885 (12.2)       | 198 (13.6)       | 1048 (16.7)      | 203 (16.2)       | 799 (12.9)       | 170 (13.7)       | 824 (15.2)  | 169 (15.6)       |
| Diseases of blood and blood-forming organs (Acute)             | No  | 1216 (95.8) | 242 (95.3)       | 4376 (93.8)      | 832 (93.8)       | 6333 (93)        | 1261 (92.6)      | 6541 (90.1)      | 1309 (90.1)      | 5879 (87.6)      | 1176 (87.6)      | 6088 (83.8)      | 1224 (84.2)      | 5281 (84.3)      | 1046 (83.5)      | 5204 (84)        | 1028 (83)        | 445 (82.4)  | 908 (83.9)       |
|                                                                | Yes | 54 (4.3)    | 12 (4.7)         | 324 (6.9)        | 58 (6.2)         | 477 (7)          | 101 (7.4)        | 724 (10)         | 144 (9.9)        | 836 (12.5)       | 167 (12.4)       | 1177 (16.2)      | 229 (15.8)       | 984 (15.7)       | 207 (16.5)       | 991 (16)         | 211 (17)         | 955 (17.7)  | 174 (16.1)       |
| Diseases of the nervous system and sense organs (Acute)        | No  | 145 (11.4)  | 28 (11)          | 340 (7.2)        | 81 (8.6)         | 683 (10)         | 137 (10.1)       | 676 (9.3)        | 140 (9.6)        | 856 (12.8)       | 175 (13)         | 898 (12.4)       | 174 (12)         | 819 (13.1)       | 166 (13.3)       | 703 (11.4)       | 142 (11.5)       | 483 (8.9)   | 107 (9.9)        |
|                                                                | Yes | 1125 (88.6) | 226 (89)         | 4360 (92.8)      | 859 (91.4)       | 6127 (90)        | 1225 (89.9)      | 6589 (90.7)      | 1313 (90.4)      | 5859 (87.3)      | 1168 (87)        | 6367 (87.6)      | 1279 (88)        | 5446 (86.9)      | 1087 (86.8)      | 5492 (88.7)      | 1097 (88.5)      | 4927 (91.1) | 975 (90.1)       |
| Diseases of the circulatory system (Acute)                     | No  | 1257 (99)   | 252 (99.2)       | 4650 (98.9)      | 930 (98.9)       | 6763 (99.3)      | 1351 (99.2)      | 7230 (99.5)      | 1443 (99.3)      | 6657 (99.1)      | 1331 (99.1)      | 7197 (99.1)      | 1437 (98.9)      | 6176 (98.6)      | 1237 (98.7)      | 6106 (98.6)      | 1221 (98.6)      | 5321 (98.4) | 1066 (98.5)      |
|                                                                | Yes | 13 (1.1)    | ___ <sup>o</sup> | 50 (1.1)         | ___ <sup>o</sup> | 47 (0.7)         | 11 (0.8)         | 35 (0.5)         | ___ <sup>o</sup> | 58 (0.9)         | 12 (0.9)         | 68 (0.9)         | 16 (1.1)         | 89 (1.4)         | 16 (1.3)         | 89 (1.4)         | 18 (1.5)         | 89 (1.7)    | 16 (1.5)         |
| Diseases of the respiratory system (Acute)                     | No  | 141 (11.1)  | 25 (9.8)         | 321 (6.8)        | 64 (6.8)         | 469 (6.9)        | 90 (6.6)         | 267 (3.7)        | 58 (4)           | 298 (4.4)        | 60 (4.5)         | 275 (3.8)        | 59 (4.1)         | 228 (3.6)        | 56 (4.5)         | 153 (2.5)        | 39 (3.2)         | 131 (2.4)   | 38 (3.5)         |
|                                                                | Yes | 1129 (88.9) | 229 (90.2)       | 4379 (93.2)      | 876 (93.2)       | 6341 (93.1)      | 1272 (93.4)      | 6998 (96.3)      | 1395 (96)        | 6417 (95.6)      | 1283 (95.5)      | 6990 (96.2)      | 1394 (95.9)      | 6037 (96.4)      | 1197 (95.5)      | 6042 (97.5)      | 1200 (96.9)      | 5279 (97.6) | 1044 (96.5)      |
| Diseases of the digestive system (Acute)                       | No  | 804 (63.3)  | 157 (61.8)       | 2769 (58.9)      | 544 (57.9)       | 3566 (52.4)      | 707 (51.9)       | 3573 (49.2)      | 706 (48.6)       | 3177 (47.3)      | 629 (46.8)       | 3190 (43.9)      | 640 (44.1)       | 2489 (39.7)      | 500 (39.9)       | 2373 (38.3)      | 481 (38.8)       | 2047 (37.8) | 424 (39.2)       |
|                                                                | Yes | 466 (36.7)  | 97 (38.2)        | 1931 (41.1)      | 396 (42.1)       | 3244 (47.6)      | 655 (48.1)       | 3692 (50.8)      | 747 (51.4)       | 3538 (52.7)      | 714 (53.2)       | 4075 (56.1)      | 813 (56)         | 3776 (60.3)      | 753 (60.1)       | 3822 (61.7)      | 758 (61.2)       | 3363 (62.2) | 658 (60.8)       |
| Diseases of the genitourinary system (Acute)                   | No  | 961 (75.7)  | 192 (75.6)       | 3922 (83.5)      | 768 (81.7)       | 5447 (80)        | 1085 (79.7)      | 5801 (79.9)      | 1156 (79.6)      | 5422 (80.7)      | 1075 (80)        | 5684 (78.2)      | 1121 (77.2)      | 4776 (76.2)      | 955 (76.2)       | 4497 (72.6)      | 889 (71.8)       | 3848 (71.1) | 779 (72)         |
|                                                                | Yes | 309 (24.3)  | 62 (24.4)        | 778 (16.6)       | 172 (18.3)       | 1363 (20)        | 277 (20.3)       | 1464 (20.2)      | 297 (20.4)       | 1293 (19.3)      | 268 (20)         | 1581 (21.8)      | 332 (22.9)       | 1489 (23.8)      | 298 (23.8)       | 1698 (27.4)      | 350 (28.3)       | 1562 (28.9) | 303 (28)         |
| Diseases of the skin and subcutaneous tissue (Acute)           | No  | 881 (69.4)  | 174 (68.5)       | 2520 (53.6)      | 505 (53.7)       | 3675 (54)        | 742 (54.5)       | 3529 (48.6)      | 696 (47.9)       | 3117 (46.4)      | 614 (45.7)       | 3041 (41.9)      | 633 (43.6)       | 2657 (42.4)      | 545 (43.5)       | 2512 (40.6)      | 502 (40.5)       | 2202 (40.7) | 447 (41.3)       |
|                                                                | Yes | 389 (30.6)  | 80 (31.5)        | 2180 (46.4)      | 435 (46.3)       | 3135 (46)        | 620 (45.5)       | 3736 (51.4)      | 757 (52.1)       | 3598 (53.6)      | 729 (54.3)       | 4224 (58.1)      | 820 (56.4)       | 3608 (57.6)      | 708 (56.5)       | 3683 (59.5)      | 737 (59.5)       | 3208 (59.3) | 635 (58.7)       |
| Diseases of the musculoskeletal system (Acute)                 | No  | 1230 (96.9) | 244 (96.1)       | 4419 (94)        | 880 (93.6)       | 6296 (92.5)      | 1254 (92.1)      | 6587 (90.7)      | 1307 (90)        | 5923 (88.2)      | 1175 (87.5)      | 6398 (88.1)      | 1272 (87.5)      | 5346 (85.3)      | 1058 (84.4)      | 5090 (82.2)      | 1007 (81.3)      | 4376 (80.9) | 875 (80.9)       |
|                                                                | Yes | 40 (3.2)    | ___ <sup>o</sup> | 281 (6)          | 60 (6.4)         | 514 (7.6)        | 108 (7.9)        | 678 (9.3)        | 146 (10.1)       | 792 (11.8)       | 168 (12.5)       | 867 (11.9)       | 181 (12.5)       | 919 (14.7)       | 195 (15.6)       | 1105 (17.8)      | 232 (18.7)       | 1034 (19.1) | 207 (19.1)       |
| Congenital anomalies                                           | No  | 1065 (83.9) | 214 (84.3)       | 4027 (85.7)      | 792 (84.3)       | 5645 (82.9)      | 1116 (81.9)      | 6045 (83.2)      | 1196 (82.3)      | 5514 (82.1)      | 1085 (80.8)      | 5906 (81.3)      | 1167 (80.3)      | 5220 (83.3)      | 1021 (81.5)      | 5275 (85.2)      | 1039 (83.9)      | 4501 (83.2) | 887 (82)         |
|                                                                | Yes | 205 (16.1)  | 40 (15.8)        | 673 (14.3)       | 148 (15.7)       | 1165 (17.1)      | 246 (18.1)       | 1220 (16.8)      | 257 (17.7)       | 1201 (17.9)      | 258 (19.2)       | 1359 (18.7)      | 286 (19.7)       | 1045 (16.7)      | 232 (18.5)       | 920 (14.9)       | 200 (16.1)       | 909 (16.8)  | 195 (18)         |
| Certain conditions originating in the perinatal period (Acute) | No  | 545 (42.9)  | 111 (43.7)       | 2029 (43.2)      | 406 (43.2)       | 2950 (43.3)      | 590 (43.3)       | 3317 (45.7)      | 660 (45.4)       | 3320 (49.4)      | 636 (47.4)       | 3158 (43.5)      | 615 (42.3)       | 2978 (47.5)      | 588 (46.9)       | 3158 (51)        | 605 (48.8)       | 2659 (49.2) | 524 (48.4)       |
|                                                                | Yes | 725 (57.1)  | 143 (56.3)       | 2671 (56.8)      | 534 (56.8)       | 3860 (56.7)      | 772 (56.7)       | 3948 (54.3)      | 793 (54.6)       | 3395 (50.6)      | 707 (52.6)       | 4107 (56.5)      | 838 (57.7)       | 3287 (52.5)      | 665 (53.1)       | 3037 (49)        | 634 (51.2)       | 2751 (50.9) | 558 (51.6)       |
| Injury and poisoning (Acute)                                   | No  | 1041 (82)   | 211 (83.1)       | 3408 (72.5)      | 678 (72.1)       | 4301 (63.2)      | 843 (61.9)       | 4140 (57)        | 834 (57.4)       | 3354 (50)        | 680 (50.6)       | 3451 (47.5)      | 697 (48)         | 2832 (45.2)      | 569 (45.4)       | 2426 (39.2)      | 479 (38.7)       | 2136 (39.5) | 439 (40.6)       |
|                                                                | Yes | 229 (18)    | 43 (16.9)        | 1292 (27.5)      | 262 (27.9)       | 2509 (36.8)      | 519 (38.1)       | 3125 (43)        | 619 (42.6)       | 3361 (50.1)      | 663 (49.4)       | 3814 (52.5)      | 756 (52)         | 3433 (54.8)      | 684 (54.6)       | 3769 (60.8)      | 760 (61.3)       | 3274 (60.5) | 643 (59.4)       |
| Infectious Disease (Chronic)                                   | No  | 1270 (100)  | 254 (100)        | 4696 (99.9)      | 939 (99.9)       | 6810 (100)       | 1362 (100)       | 7258 (99.9)      | 1451 (99.9)      | 6706 (99.9)      | 1341 (99.9)      | 7263 (100)       | 1452 (99.9)      | 6261 (99.9)      | 1252 (99.9)      | 6192 (100)       | 1238 (99.9)      | 5410 (100)  | 1082 (100)       |
|                                                                | Yes | 0 (0)       | 0 (0)            | ___ <sup>o</sup> | ___ <sup>o</sup> | ___ <sup>o</sup> | 0 (0)            | ___ <sup>o</sup> | 0 (0)       | 0 (0)            |
| Neoplasm (Chronic)                                             | No  | 1264 (99.5) | 253 (99.6)       | 4696 (99.9)      | 939 (99.9)       | 6792 (99.7)      | 1358 (99.7)      | 7255 (99.9)      | 1451 (99.9)      | 6687 (99.6)      | 1338 (99.6)      | 7246 (99.7)      | 1449 (99.7)      | 6250 (99.8)      | 1249 (99.7)      | 6170 (99.6)      | 1234 (99.6)      | 5389 (99.6) | 1079 (99.7)      |
|                                                                | Yes | 6 (0.5)     | ___ <sup>o</sup> | ___ <sup>o</sup> | ___ <sup>o</sup> | 18 (0.3)         | ___ <sup>o</sup> | ___ <sup>o</sup> | ___ <sup>o</sup> | 28 (0.4)         | ___ <sup>o</sup> | 19 (0.3)         | ___ <sup>o</sup> | 15 (0.2)         | ___ <sup>o</sup> | 25 (0.4)         | ___ <sup>o</sup> | 21 (0.4)    | ___ <sup>o</sup> |
| Endocrine, metabolic, and immunity disorders (Chronic)         | No  | 1220 (96.1) | 243 (95.7)       | 4495 (95.6)      | 897 (95.4)       | 6466 (95)        | 1282 (94.1)      | 6863 (94.5)      | 1364 (93.9)      | 6356 (94.7)      | 1264 (94.1)      | 6902 (95)        | 1371 (94.4)      | 5878 (93.8)      | 1161 (92.7)      | 5893 (95.1)      | 1173 (94.7)      | 5043 (93.2) | 1010 (93.4)      |
|                                                                | Yes | 50 (3.9)    | 11 (4.3)         | 205 (4.4)        | 43 (4.6)         | 344 (5.1)        | 80 (5.9)         | 402 (5.5)        | 89 (6.1)         | 359 (5.4)        | 79 (5.9)         | 363 (5)          | 82 (5.6)         | 387 (6.2)        | 92 (7.3)         | 302 (4.9)        | 66 (5.3)         | 347 (6.8)   | 72 (6.7)         |
| Diseases of blood and blood-forming organs (Chronic)           | No  | 1235 (99.2) | 248 (97.6)       | 4529 (96.4)      | 902 (96)         | 6578 (96.6)      | 1304 (95.7)      | 6809 (93.7)      | 1362 (93.7)      | 6475 (96.4)      | 1287 (95.8)      | 6858 (94.4)      | 1373 (94.5)      | 5857 (93.5)      | 1174 (93.7)      | 5810 (93.8)      | 1164 (94)        | 5066 (93.6) | 1011 (93.4)      |
|                                                                | Yes | 35 (2.8)    | ___ <sup>o</sup> | 171 (3.6)        | 38 (4)           | 232 (3.4)        | 58 (4.3)         | 456 (6.3)        | 91 (6.3)         | 240 (3.6)        | 56 (4.2)         | 407 (5.6)        | 80 (5.5)         | 408 (6.5)        | 79 (6.3)         | 385 (6.2)        | 75 (6.1)         | 344 (6.4)   | 71 (6.6)         |
| Diseases of the nervous system and sense organs (Chronic)      | No  | 561 (44.2)  | 118 (46.5)       | 2131 (45.3)      | 419 (44.6)       | 3405 (50)        | 682 (50.1)       | 4370 (60.2)      | 883 (60.8)       | 4524 (67.4)      | 899 (66.9)       | 5244 (72.2)      | 1038 (71.4)      | 4509 (72)        | 901 (71.9)       | 4611 (74.4)      | 912 (73.6)       | 3840 (71)   | 750 (69.3)       |
|                                                                | Yes | 709 (55.8)  | 136 (53.5)       | 2569 (54.7)      | 521 (55.4)       | 3405 (50)        | 680 (49.9)       | 2895 (39.9)      | 570 (39.2)       | 2191 (32.6)      | 444 (33.1)       | 2021 (27.8)      | 415 (28.6)       | 1756 (28)        | 352 (28.1)       | 1584 (25.6)      | 327 (26.4)       | 1570 (29)   | 332 (30.7)       |
| Diseases of the circulatory system (Chronic)                   | No  | 1199 (94.4) | 241 (94.9)       | 4538 (96.6)      | 909 (96.7)       | 6572 (96.5)      | 1311 (96.3)      | 7011 (96.5)      | 1400 (96.4)      | 6436 (95.9)      | 1287 (95.8)      | 6985 (96.2)      | 1392 (95.8)      | 5989 (95.6)      | 1194 (95.3)      | 5993 (96.7)      | 1194 (96.4)      | 5182 (95.8) | 1031 (95.3)      |
|                                                                | Yes | 71 (5.6)    | 13 (5.1)         | 162 (3.5)        | 31 (3.3)         | 238 (3.5)        | 51 (3.7)         | 254 (3.5)        | 53 (3.7)         | 279 (4.2)        | 56 (4.2)         | 280 (3.9)        | 61 (4.2)         | 276 (4.4)        | 59 (4.7)         | 202 (3.3)        | 45 (3.6)         | 228 (4.8)   | 51 (4.7)         |
| Diseases of the respiratory system (Chronic)                   | No  | 600 (47.2)  | 116 (45.7)       | 2050 (43.6)      | 405 (43.1)       | 2971 (43.6)      | 593 (43.5)       | 2595 (35.7)      | 521 (35.9)       | 2402 (35.8)      | 480 (35.7)       | 2354 (32.4)      | 484 (33.3)       | 1890 (30.2)      | 388 (31)         | 1935 (31.2)      | 396 (32)         | 1433 (26.5) | 320 (29.6)       |
|                                                                | Yes | 670 (52.8)  | 138 (54.3)       | 2650 (56.4)      | 535 (56.9)       | 3839 (56.4)      | 769 (56.5)       | 4670 (64.3)      | 932 (64.1)       | 4313 (64.2)      | 863 (64.3)       | 4911 (67.6)      | 969 (66.7)       | 4375 (69.8)      | 865 (69)         | 4260 (68.8)      | 843 (68)         | 3977 (73.5) | 762 (70.4)       |
| Diseases of the digestive system (Chronic)                     | No  | 1015 (79.9) | 197 (77.6)       | 3604 (76.7)      | 716 (76.2)       | 5469 (80.3)      | 1090 (80)        | 5945 (81.8)      | 1179 (81.1)      | 5570 (83)        | 1105 (82.3)      | 6162 (84.8)      | 1229 (84.6)      | 5306 (84.7)      | 1049 (83.7)      | 5448 (87.9)      | 1076 (86.8)      | 4678 (86.5) | 925 (85.5)       |
|                                                                | Yes | 255 (20.1)  |                  |                  |                  |                  |                  |                  |                  |                  |                  |                  |                  |                  |                  |                  |                  |             |                  |

**Table 9: Characteristics of NY Pyloromyotomy Matched Cohorts by Age at Exposure**

|                                                          |            | >Birth - ≤28 days |            | >28 days - ≤6 months |             |
|----------------------------------------------------------|------------|-------------------|------------|----------------------|-------------|
|                                                          |            | Exposure          |            | Exposure             |             |
|                                                          |            | No                | Yes        | No                   | Yes         |
|                                                          |            | n(%)              | n(%)       | n(%)                 | n(%)        |
| Sex                                                      | Female     | 562 (15.7)        | 113 (15.8) | 1055 (20.3)          | 218 (20.9)  |
|                                                          | Male       | 3013 (84.3)       | 602 (84.2) | 4155 (79.8)          | 824 (79.1)  |
| Race                                                     | White      | 1219 (34.1)       | 245 (34.3) | 2254 (43.3)          | 454 (43.6)  |
|                                                          | Black      | 440 (12.3)        | 86 (12)    | 703 (13.5)           | 138 (13.2)  |
|                                                          | Hispanic   | 1123 (31.4)       | 223 (31.2) | 1240 (23.8)          | 252 (24.2)  |
|                                                          | Other      | 793 (22.2)        | 161 (22.5) | 1013 (19.4)          | 198 (19)    |
|                                                          |            |                   |            |                      |             |
| Income Based on ZIP Code of Residence (quartile)         | Quartile 1 | 847 (23.7)        | 171 (23.9) | 1312 (25.2)          | 256 (24.6)  |
|                                                          | Quartile 2 | 856 (23.9)        | 170 (23.8) | 1340 (25.7)          | 266 (25.5)  |
|                                                          | Quartile 3 | 1028 (28.8)       | 207 (29)   | 1423 (27.3)          | 281 (27)    |
|                                                          | Quartile 4 | 844 (23.6)        | 167 (23.4) | 1135 (21.8)          | 239 (22.9)  |
| Number of Outpatient Visits (quartile)                   | Quartile 1 | 1726 (48.3)       | 342 (47.8) | 0 (0)                | 0 (0)       |
|                                                          | Quartile 2 | 1006 (28.1)       | 203 (28.4) | 1826 (35.1)          | 361 (34.6)  |
|                                                          | Quartile 3 | 552 (15.4)        | 108 (15.1) | 1150 (22.1)          | 225 (21.6)  |
|                                                          | Quartile 4 | 291 (8.1)         | 62 (8.7)   | 2234 (42.9)          | 456 (43.8)  |
| Total Number of Inpatient Stays (n)                      | 0          | 0 (0)             | 0 (0)      | 0 (0)                | 0 (0)       |
|                                                          | 1          | 3501 (97.9)       | 699 (97.8) | 4805 (92.2)          | 960 (92.1)  |
|                                                          | 2          | 74 (2.1)          | 16 (2.2)   | 386 (7.4)            | 78 (7.5)    |
|                                                          | 3 or more  | 0 (0)             | 0 (0)      | 19 (0.4)             | °           |
| <36 Weeks Gestational Age                                | No         | 3493 (97.7)       | 699 (97.8) | 4962 (95.2)          | 987 (94.7)  |
|                                                          | Yes        | 82 (2.3)          | 16 (2.2)   | 248 (4.8)            | 55 (5.3)    |
| Low Birth Weight (<2500g and ≥1500g)                     | No         | 3507 (98.1)       | 702 (98.2) | 5013 (96.2)          | 1000 (96)   |
|                                                          | Yes        | 68 (1.9)          | 13 (1.8)   | 197 (3.8)            | 42 (4)      |
| Very Low Birth Weight (<1500g and ≥1000g)                | No         | 3575 (100)        | 715 (100)  | 5199 (99.8)          | 1039 (99.7) |
|                                                          | Yes        | 0 (0)             | 0 (0)      | 11 (0.2)             | °           |
| Extremely Low Birth Weight (<1000g)                      | No         | 3575 (100)        | 715 (100)  | 5200 (99.8)          | 1039 (99.7) |
|                                                          | Yes        | 0 (0)             | 0 (0)      | °                    | °           |
| Chromosomal Anomalies                                    | No         | 3575 (100)        | 715 (100)  | 5210 (100)           | 1042 (100)  |
|                                                          | Yes        | 0 (0)             | 0 (0)      | 0 (0)                | 0 (0)       |
| Congenital Anomalies of the Heart and Circulatory System | No         | 3494 (97.7)       | 699 (97.8) | 5066 (97.2)          | 1017 (97.6) |
|                                                          | Yes        | 81 (2.3)          | 16 (2.2)   | 144 (2.8)            | 25 (2.4)    |
| Congenital Anomalies of the Central Nervous System       | No         | 3554 (99.4)       | 711 (99.4) | 5203 (99.9)          | 1041 (99.9) |
|                                                          | Yes        | 21 (0.6)          | °          | °                    | °           |
| Congenital Anomalies of the Eye                          | No         | 3562 (99.6)       | 712 (99.6) | 5188 (99.6)          | 1034 (99.2) |
|                                                          | Yes        | 13 (0.4)          | °          | 22 (0.4)             | °           |
| Congenital Anomalies of the Genital Organs               | No         | 3559 (99.6)       | 711 (99.4) | 5190 (99.6)          | 1037 (99.5) |
|                                                          | Yes        | 16 (0.5)          | °          | 20 (0.4)             | °           |
| Congenital Anomalies of the Digestive System             | No         | 3568 (99.8)       | 714 (99.9) | 5201 (99.8)          | 1038 (99.6) |
|                                                          | Yes        | °                 | °          | °                    | °           |
| Congenital Musculoskeletal Deformities                   | No         | 3531 (98.8)       | 704 (98.5) | 5168 (99.2)          | 1030 (98.9) |
|                                                          | Yes        | 44 (1.2)          | 11 (1.5)   | 42 (0.8)             | 12 (1.2)    |
| Other Congenital Anomalies                               | No         | 3575 (100)        | 715 (100)  | 5205 (99.9)          | 1040 (99.8) |
|                                                          | Yes        | 0 (0)             | 0 (0)      | °                    | °           |
| Congenital Anomalies of the Respiratory System           | No         | 3575 (100)        | 715 (100)  | 5197 (99.8)          | 1038 (99.6) |
|                                                          | Yes        | 0 (0)             | 0 (0)      | 13 (0.3)             | °           |
| Congenital Anomalies of the Skin                         | No         | 3473 (97.2)       | 695 (97.2) | 5048 (96.9)          | 1009 (96.8) |
|                                                          | Yes        | 102 (2.9)         | 20 (2.8)   | 162 (3.1)            | 33 (3.2)    |
| Congenital Anomalies of the Urinary System               | No         | 3566 (99.8)       | 713 (99.7) | 5190 (99.6)          | 1038 (99.6) |
|                                                          | Yes        | °                 | °          | 20 (0.4)             | °           |
| Intrauterine Hypoxia                                     | No         | 3563 (99.7)       | 713 (99.7) | 5162 (99.1)          | 1030 (98.9) |
|                                                          | Yes        | 12 (0.3)          | °          | 48 (0.9)             | 12 (1.2)    |
| Intrauterine Exposure to Noxious Agent                   | No         | 3529 (98.7)       | 707 (98.9) | 5150 (98.9)          | 1030 (98.9) |
|                                                          | Yes        | 46 (1.3)          | °          | 60 (1.2)             | 12 (1.2)    |



|                                                                  |     |                  |                  |                  |                  |
|------------------------------------------------------------------|-----|------------------|------------------|------------------|------------------|
| Intrauterine Placental Insufficiency                             | No  | 3542 (99.1)      | 708 (99)         | 5116 (98.2)      | 1024 (98.3)      |
|                                                                  | Yes | 33 (0.9)         | ___ <sup>a</sup> | 94 (1.8)         | 18 (1.7)         |
| Infectious Disease (Acute)                                       | No  | 3446 (96.4)      | 692 (96.8)       | 4798 (92.1)      | 965 (92.6)       |
|                                                                  | Yes | 129 (3.6)        | 23 (3.2)         | 412 (7.9)        | 77 (7.4)         |
| Neoplasm (Acute)                                                 | No  | 3575 (100)       | 715 (100)        | 5205 (99.9)      | 1041 (99.9)      |
|                                                                  | Yes | 0 (0)            | 0 (0)            | ___ <sup>a</sup> | ___ <sup>a</sup> |
| Endocrine, metabolic, and immunity disorders (Acute)             | No  | 3573 (99.9)      | 714 (99.9)       | 5166 (99.2)      | 1030 (98.9)      |
|                                                                  | Yes | ___ <sup>a</sup> | ___ <sup>a</sup> | 44 (0.8)         | 12 (1.2)         |
| Diseases of blood and blood-forming organs (Acute)               | No  | 3575 (100)       | 715 (100)        | 5203 (99.9)      | 1041 (99.9)      |
|                                                                  | Yes | 0 (0)            | 0 (0)            | ___ <sup>a</sup> | ___ <sup>a</sup> |
| Diseases of the nervous system and sense organs (Acute)          | No  | 3463 (96.9)      | 693 (96.9)       | 5081 (97.5)      | 1013 (97.2)      |
|                                                                  | Yes | 112 (3.1)        | 22 (3.1)         | 129 (2.5)        | 29 (2.8)         |
| Diseases of the circulatory system (Acute)                       | No  | 3573 (99.9)      | 714 (99.9)       | 5200 (99.8)      | 1040 (99.8)      |
|                                                                  | Yes | ___ <sup>a</sup> | ___ <sup>a</sup> | ___ <sup>a</sup> | ___ <sup>a</sup> |
| Diseases of the respiratory system (Acute)                       | No  | 3492 (97.7)      | 700 (97.9)       | 4810 (92.3)      | 959 (92)         |
|                                                                  | Yes | 83 (2.3)         | 15 (2.1)         | 400 (7.7)        | 83 (8)           |
| Diseases of the digestive system (Acute)                         | No  | 3446 (96.4)      | 691 (96.6)       | 4774 (91.6)      | 958 (91.9)       |
|                                                                  | Yes | 129 (3.6)        | 24 (3.4)         | 436 (8.4)        | 84 (8.1)         |
| Diseases of the genitourinary system (Acute)                     | No  | 3419 (95.6)      | 680 (95.1)       | 4968 (95.4)      | 991 (95.1)       |
|                                                                  | Yes | 156 (4.4)        | 35 (4.9)         | 242 (4.6)        | 51 (4.9)         |
| Diseases of the skin and subcutaneous tissue (Acute)             | No  | 3472 (97.1)      | 694 (97.1)       | 4949 (95)        | 988 (94.8)       |
|                                                                  | Yes | 103 (2.9)        | 21 (2.9)         | 261 (5)          | 54 (5.2)         |
| Diseases of the musculoskeletal system (Acute)                   | No  | 3529 (98.7)      | 706 (98.7)       | 5192 (99.7)      | 1037 (99.5)      |
|                                                                  | Yes | 46 (1.3)         | ___ <sup>a</sup> | 18 (0.4)         | ___ <sup>a</sup> |
| Congenital anomalies                                             | No  | 3298 (92.3)      | 659 (92.2)       | 4777 (91.7)      | 954 (91.6)       |
|                                                                  | Yes | 277 (7.8)        | 56 (7.8)         | 433 (8.3)        | 88 (8.5)         |
| Certain conditions originating in the perinatal period (Acute)   | No  | 1809 (50.6)      | 362 (50.6)       | 2603 (50)        | 525 (50.4)       |
|                                                                  | Yes | 1766 (49.4)      | 353 (49.4)       | 2607 (50)        | 517 (49.6)       |
| Injury and poisoning (Acute)                                     | No  | 3525 (98.6)      | 705 (98.6)       | 5112 (98.1)      | 1023 (98.2)      |
|                                                                  | Yes | 50 (1.4)         | ___ <sup>a</sup> | 98 (1.9)         | 19 (1.8)         |
| Infectious Disease (Chronic)                                     | No  | 3575 (100)       | 715 (100)        | 5210 (100)       | 1042 (100)       |
|                                                                  | Yes | 0 (0)            | 0 (0)            | 0 (0)            | 0 (0)            |
| Neoplasm (Chronic)                                               | No  | 3575 (100)       | 715 (100)        | 5210 (100)       | 1042 (100)       |
|                                                                  | Yes | 0 (0)            | 0 (0)            | 0 (0)            | 0 (0)            |
| Endocrine, metabolic, and immunity disorders (Chronic)           | No  | 3562 (99.6)      | 710 (99.3)       | 5152 (98.9)      | 1026 (98.5)      |
|                                                                  | Yes | 13 (0.4)         | ___ <sup>a</sup> | 58 (1.1)         | 16 (1.5)         |
| Diseases of blood and blood-forming organs (Chronic)             | No  | 3566 (99.8)      | 714 (99.9)       | 5206 (99.9)      | 1041 (99.9)      |
|                                                                  | Yes | ___ <sup>a</sup> | ___ <sup>a</sup> | ___ <sup>a</sup> | ___ <sup>a</sup> |
| Diseases of the nervous system and sense organs (Chronic)        | No  | 3531 (98.8)      | 706 (98.7)       | 5081 (97.5)      | 1010 (96.9)      |
|                                                                  | Yes | 44 (1.2)         | ___ <sup>a</sup> | 129 (2.5)        | 32 (3.1)         |
| Diseases of the circulatory system (Chronic)                     | No  | 3570 (99.9)      | 712 (99.6)       | 5153 (98.9)      | 1032 (99)        |
|                                                                  | Yes | ___ <sup>a</sup> | ___ <sup>a</sup> | 57 (1.1)         | ___ <sup>a</sup> |
| Diseases of the respiratory system (Chronic)                     | No  | 3571 (99.9)      | 714 (99.9)       | 5192 (99.7)      | 1036 (99.4)      |
|                                                                  | Yes | ___ <sup>a</sup> | ___ <sup>a</sup> | 18 (0.4)         | ___ <sup>a</sup> |
| Diseases of the digestive system (Chronic)                       | No  | 3406 (95.3)      | 682 (95.4)       | 4642 (89.1)      | 928 (89.1)       |
|                                                                  | Yes | 169 (4.7)        | 33 (4.6)         | 568 (10.9)       | 114 (10.9)       |
| Diseases of the genitourinary system (Chronic)                   | No  | 3572 (99.9)      | 714 (99.9)       | 5205 (99.9)      | 1040 (99.8)      |
|                                                                  | Yes | ___ <sup>a</sup> | ___ <sup>a</sup> | ___ <sup>a</sup> | ___ <sup>a</sup> |
| Diseases of the skin and subcutaneous tissue (Chronic)           | No  | 3575 (100)       | 715 (100)        | 5184 (99.5)      | 1036 (99.4)      |
|                                                                  | Yes | 0 (0)            | 0 (0)            | 26 (0.5)         | ___ <sup>a</sup> |
| Diseases of the musculoskeletal system (Chronic)                 | No  | 3575 (100)       | 715 (100)        | 5207 (99.9)      | 1041 (99.9)      |
|                                                                  | Yes | 0 (0)            | 0 (0)            | ___ <sup>a</sup> | ___ <sup>a</sup> |
| Certain conditions originating in the perinatal period (Chronic) | No  | 3541 (99.1)      | 708 (99)         | 5167 (99.2)      | 1033 (99.1)      |
|                                                                  | Yes | 34 (1)           | ___ <sup>a</sup> | 43 (0.8)         | ___ <sup>a</sup> |
| Injury and poisoning (Chronic)                                   | No  | 3575 (100)       | 715 (100)        | 5210 (100)       | 1042 (100)       |
|                                                                  | Yes | 0 (0)            | 0 (0)            | 0 (0)            | 0 (0)            |

<sup>a</sup>These data are not presented as the report of data for any subgroup with 10 or fewer subjects is prohibited by the Centers for Medicare & Medicaid Services data use agreement.

**Table 10: Characteristics of NY Inguinal Hernia Matched Cohorts by Age at Exposure**

|                                                          |            | >Birth - ≤28 days |                  | >28 days - ≤6 months |                  | >6 months - ≤1 yr |                  | >1 yr - ≤1.5 yrs |                  | >1.5 yrs - ≤2 yrs |                  | >2 yrs - ≤2.5 yrs |                  | >2.5 yrs - ≤3 yrs |                  | >3 yrs - ≤3.5 yrs |                  | >3.5 yrs - ≤4 yrs |                  | >4 yrs - ≤4.5 yrs |                  | >4.5yrs - ≤5 yrs |                  |
|----------------------------------------------------------|------------|-------------------|------------------|----------------------|------------------|-------------------|------------------|------------------|------------------|-------------------|------------------|-------------------|------------------|-------------------|------------------|-------------------|------------------|-------------------|------------------|-------------------|------------------|------------------|------------------|
|                                                          |            | Exposure          |                  | Exposure             |                  | Exposure          |                  | Exposure         |                  | Exposure          |                  | Exposure          |                  | Exposure          |                  | Exposure          |                  | Exposure          |                  | Exposure          |                  | Exposure         |                  |
|                                                          |            | No<br>n(%)        | Yes<br>n(%)      | No<br>n(%)           | Yes<br>n(%)      | No<br>n(%)        | Yes<br>n(%)      | No<br>n(%)       | Yes<br>n(%)      | No<br>n(%)        | Yes<br>n(%)      | No<br>n(%)        | Yes<br>n(%)      | No<br>n(%)        | Yes<br>n(%)      | No<br>n(%)        | Yes<br>n(%)      | No<br>n(%)        | Yes<br>n(%)      | No<br>n(%)        | Yes<br>n(%)      | No<br>n(%)       | Yes<br>n(%)      |
| Sex                                                      | Female     | 50 (23.3)         | ___ <sup>o</sup> | 1479 (21.4)          | 294 (21.2)       | 453 (19)          | 91 (19.1)        | 318 (15.4)       | 62 (15)          | 184 (15.6)        | 39 (16.5)        | 156 (16.4)        | 30 (15.8)        | 176 (25.7)        | 33 (24.1)        | 215 (29.7)        | 46 (31.7)        | 131 (25.9)        | 32 (31.7)        | 140 (28.9)        | 29 (29.9)        | 112 (30.3)       | 21 (28.4)        |
|                                                          | Male       | 165 (76.7)        | 34 (79.1)        | 5441 (78.6)          | 1090 (78.8)      | 1932 (81)         | 386 (80.9)       | 1752 (84.6)      | 352 (85)         | 996 (84.4)        | 197 (83.5)       | 794 (83.6)        | 160 (84.2)       | 509 (74.3)        | 104 (75.9)       | 510 (70.3)        | 99 (68.3)        | 374 (74.1)        | 69 (68.3)        | 345 (71.1)        | 68 (70.1)        | 258 (69.7)       | 53 (71.6)        |
| Race                                                     | White      | 71 (33)           | 15 (34.9)        | 2197 (31.8)          | 450 (32.5)       | 761 (31.9)        | 151 (31.7)       | 805 (38.9)       | 149 (36)         | 455 (38.6)        | 90 (38.1)        | 428 (45.1)        | 88 (46.3)        | 289 (42.2)        | 53 (38.7)        | 284 (39.2)        | 57 (39.3)        | 247 (48.9)        | 46 (45.5)        | 313 (64.5)        | 58 (59.8)        | 170 (46)         | 35 (47.3)        |
|                                                          | Black      | 54 (25.1)         | 11 (25.6)        | 1912 (27.6)          | 375 (27.1)       | 847 (35.5)        | 156 (32.7)       | 572 (27.6)       | 117 (28.3)       | 212 (18)          | 48 (20.3)        | 188 (19.8)        | 32 (16.8)        | 131 (19.1)        | 28 (20.4)        | 134 (18.5)        | 30 (20.7)        | 81 (16)           | 20 (19.8)        | 73 (15.1)         | 15 (15.5)        | 65 (17.6)        | 11 (14.9)        |
|                                                          | Hispanic   | 66 (30.7)         | 12 (27.9)        | 1323 (19.1)          | 264 (19.1)       | 374 (15.7)        | 81 (17)          | 321 (15.5)       | 71 (17.2)        | 230 (19.5)        | 40 (17)          | 186 (19.6)        | 39 (20.5)        | 118 (17.2)        | 25 (18.3)        | 149 (20.6)        | 25 (17.2)        | 94 (18.6)         | 18 (17.8)        | 59 (12.2)         | 12 (12.4)        | 74 (20)          | 13 (17.6)        |
|                                                          | Other      | 24 (11.2)         | ___ <sup>o</sup> | 1488 (21.5)          | 295 (21.3)       | 403 (16.9)        | 89 (18.7)        | 372 (18)         | 77 (18.6)        | 283 (24)          | 58 (24.6)        | 148 (15.6)        | 31 (16.3)        | 147 (21.5)        | 31 (22.6)        | 158 (21.8)        | 33 (22.8)        | 83 (16.4)         | 17 (16.8)        | 40 (8.3)          | 12 (12.4)        | 61 (16.5)        | 15 (20.3)        |
| Income Based on ZIP Code of Residence (quartile)         | Quartile 1 | 60 (27.9)         | 11 (25.6)        | 1921 (27.8)          | 378 (27.3)       | 654 (27.4)        | 135 (28.3)       | 622 (30.1)       | 121 (29.2)       | 281 (23.8)        | 56 (23.7)        | 196 (20.6)        | 44 (23.2)        | 209 (30.5)        | 43 (31.4)        | 168 (23.2)        | 35 (24.1)        | 180 (35.6)        | 33 (32.7)        | 104 (21.4)        | 27 (27.8)        | 138 (37.3)       | 22 (29.7)        |
|                                                          | Quartile 2 | 80 (37.2)         | 16 (37.2)        | 1782 (25.8)          | 355 (25.7)       | 550 (23.1)        | 121 (25.4)       | 447 (21.6)       | 101 (24.4)       | 300 (25.4)        | 62 (26.3)        | 256 (27)          | 52 (27.4)        | 174 (25.4)        | 33 (24.1)        | 212 (29.2)        | 39 (26.9)        | 126 (25)          | 26 (25.7)        | 116 (23.9)        | 22 (22.7)        | 86 (23.2)        | 22 (29.7)        |
|                                                          | Quartile 3 | 47 (21.9)         | ___ <sup>o</sup> | 1564 (22.6)          | 324 (23.4)       | 663 (27.8)        | 123 (25.8)       | 496 (24)         | 98 (23.7)        | 247 (20.9)        | 49 (20.8)        | 203 (21.4)        | 41 (21.6)        | 121 (17.7)        | 24 (17.5)        | 121 (16.7)        | 25 (17.2)        | 83 (16.4)         | 18 (17.8)        | 148 (30.5)        | 26 (26.8)        | 69 (18.7)        | 12 (16.2)        |
|                                                          | Quartile 4 | 28 (13)           | ___ <sup>o</sup> | 1653 (23.9)          | 327 (23.6)       | 518 (21.7)        | 98 (20.6)        | 505 (24.4)       | 94 (22.7)        | 352 (29.8)        | 69 (29.2)        | 295 (31.1)        | 53 (27.9)        | 181 (26.4)        | 37 (27)          | 224 (30.9)        | 46 (31.7)        | 116 (23)          | 24 (23.8)        | 117 (24.1)        | 22 (22.7)        | 77 (20.8)        | 18 (24.3)        |
| Number of Outpatient Visits (quartile)                   | Quartile 1 | 94 (43.7)         | 19 (44.2)        | 0 (0)                | 0 (0)            | 372 (15.6)        | 77 (16.1)        | 363 (17.5)       | 73 (16.7)        | 225 (19.1)        | 41 (19.4)        | 155 (16.3)        | 33 (17.4)        | 142 (20.7)        | 26 (19)          | 123 (17)          | 24 (16.6)        | 113 (22.4)        | 25 (24.8)        | 110 (22.7)        | 20 (20.6)        | 55 (14.9)        | 10 (13.5)        |
|                                                          | Quartile 2 | 73 (34)           | 13 (30.2)        | 2852 (41.2)          | 567 (41)         | 496 (20.8)        | 93 (19.5)        | 439 (21.2)       | 83 (20.1)        | 236 (20)          | 50 (21.2)        | 216 (22.7)        | 39 (20.5)        | 109 (15.9)        | 25 (18.3)        | 126 (17.4)        | 28 (19.3)        | 103 (20.4)        | 18 (17.8)        | 93 (19.2)         | 17 (17.5)        | 48 (13)          | 11 (14.9)        |
|                                                          | Quartile 3 | 31 (14.4)         | ___ <sup>o</sup> | 1182 (17.1)          | 231 (16.7)       | 649 (27.2)        | 134 (28.1)       | 621 (30)         | 121 (29.2)       | 235 (19.9)        | 51 (21.6)        | 235 (24.7)        | 47 (24.7)        | 128 (18.7)        | 25 (18.3)        | 193 (26.6)        | 40 (27.6)        | 127 (25.2)        | 22 (21.8)        | 98 (20.2)         | 21 (21.7)        | 114 (30.8)       | 19 (25.7)        |
|                                                          | Quartile 4 | 17 (7.9)          | ___ <sup>o</sup> | 2886 (41.7)          | 586 (42.3)       | 868 (36.4)        | 173 (36.3)       | 647 (31.3)       | 137 (33.1)       | 484 (41)          | 94 (39.8)        | 344 (36.2)        | 71 (37.4)        | 306 (44.7)        | 61 (44.5)        | 283 (39)          | 53 (36.6)        | 162 (32.1)        | 36 (35.6)        | 184 (37.9)        | 39 (40.2)        | 153 (41.4)       | 34 (46)          |
| Total Number of Inpatient Stays (n)                      | 0          | 0 (0)             | 0 (0)            | 0 (0)                | 0 (0)            | 0 (0)             | 0 (0)            | 0 (0)            | 0 (0)            | 0 (0)             | 0 (0)            | 0 (0)             | 0 (0)            | 0 (0)             | 0 (0)            | 0 (0)             | 0 (0)            | 0 (0)             | 0 (0)            | 0 (0)             | 0 (0)            | 0 (0)            | 0 (0)            |
|                                                          | 1          | 208 (96.7)        | 41 (95.4)        | 5932 (85.7)          | 1194 (86.3)      | 1994 (83.6)       | 390 (81.8)       | 1765 (85.3)      | 341 (82.4)       | 963 (81.6)        | 190 (80.5)       | 774 (81.5)        | 154 (81.1)       | 570 (83.2)        | 114 (83.2)       | 596 (82.2)        | 116 (80)         | 355 (70.3)        | 65 (64.4)        | 361 (74.4)        | 73 (75.3)        | 275 (74.3)       | 54 (73)          |
|                                                          | 2          | 7 (3)             | ___ <sup>o</sup> | 727 (10.5)           | 141 (10.2)       | 278 (11.7)        | 64 (13.4)        | 244 (11.8)       | 56 (13.5)        | 156 (13.2)        | 30 (12.7)        | 134 (14.1)        | 26 (13.7)        | 74 (10.8)         | 15 (11)          | 96 (13.2)         | 21 (14.5)        | 115 (22.8)        | 26 (25.7)        | 82 (16.9)         | 14 (14.4)        | 60 (16.2)        | 13 (17.6)        |
|                                                          | 3 or more  | 0 (0)             | 0 (0)            | 261 (3.8)            | 49 (3.5)         | 113 (4.7)         | 23 (4.8)         | 61 (3.3)         | 17 (4.1)         | 61 (5.2)          | 16 (6.8)         | 42 (4.4)          | ___ <sup>o</sup> | 41 (6)            | ___ <sup>o</sup> | 33 (4.6)          | ___ <sup>o</sup> | 35 (6.9)          | ___ <sup>o</sup> | 42 (8.7)          | ___ <sup>o</sup> | 35 (9.5)         | ___ <sup>o</sup> |
| <36 Weeks Gestational Age                                | No         | 202 (94)          | 41 (95.4)        | 5226 (75.5)          | 1058 (76.5)      | 2040 (85.5)       | 401 (84.1)       | 1872 (90.4)      | 367 (88.7)       | 1086 (92)         | 217 (92)         | 872 (91.8)        | 173 (91.1)       | 670 (97.8)        | 133 (97.1)       | 676 (93.2)        | 135 (93.1)       | 488 (96.6)        | 97 (96)          | 477 (98.4)        | 94 (96.9)        | 359 (97)         | 71 (96)          |
|                                                          | Yes        | 13 (6.1)          | ___ <sup>o</sup> | 1694 (24.5)          | 326 (23.6)       | 345 (14.5)        | 76 (15.9)        | 198 (9.6)        | 47 (11.4)        | 94 (8)            | 19 (8.1)         | 78 (8.2)          | 17 (9)           | 15 (2.2)          | ___ <sup>o</sup> | 49 (6.8)          | ___ <sup>o</sup> | 17 (3.4)          | ___ <sup>o</sup> | ___ <sup>o</sup>  | ___ <sup>o</sup> | 11 (3)           | ___ <sup>o</sup> |
| Low Birth Weight (<2500g and ≥1500g)                     | No         | 203 (94.4)        | 41 (95.4)        | 5451 (78.8)          | 1120 (80.9)      | 2112 (88.6)       | 422 (88.5)       | 1891 (91.4)      | 374 (90.3)       | 1126 (95.4)       | 223 (94.5)       | 887 (93.4)        | 177 (93.2)       | 678 (99)          | 134 (97.8)       | 685 (94.5)        | 136 (93.8)       | 463 (91.7)        | 93 (92.1)        | 461 (95.1)        | 92 (94.9)        | 349 (94.3)       | 70 (94.6)        |
|                                                          | Yes        | 12 (5.6)          | ___ <sup>o</sup> | 1469 (21.2)          | 264 (19.1)       | 273 (11.5)        | 55 (11.5)        | 179 (8.7)        | 40 (9.7)         | 54 (4.6)          | 13 (5.5)         | 63 (6.6)          | 13 (6.8)         | ___ <sup>o</sup>  | ___ <sup>o</sup> | 40 (5.5)          | ___ <sup>o</sup> | 42 (8.3)          | ___ <sup>o</sup> | 24 (5)            | ___ <sup>o</sup> | 21 (5.7)         | ___ <sup>o</sup> |
| Very Low Birth Weight (<1500g and ≥1000g)                | No         | 215 (100)         | 43 (100)         | 6366 (92)            | 1250 (90.3)      | 2281 (95.6)       | 453 (95)         | 2029 (98.4)      | 401 (96.9)       | 1172 (99.3)       | 233 (98.7)       | 928 (97.7)        | 185 (97.4)       | 678 (99)          | 135 (98.5)       | 710 (97.9)        | 142 (97.9)       | 502 (99.4)        | 100 (99)         | 483 (99.6)        | 96 (99)          | 365 (98.7)       | 73 (98.7)        |
|                                                          | Yes        | 0 (0)             | 0 (0)            | 554 (8)              | 134 (9.7)        | 104 (4.4)         | 24 (5)           | 41 (2)           | 13 (3.1)         | ___ <sup>o</sup>  | ___ <sup>o</sup> | 22 (2.3)          | ___ <sup>o</sup> | ___ <sup>o</sup>  | ___ <sup>o</sup> | 15 (2.1)          | ___ <sup>o</sup> | ___ <sup>o</sup>  | ___ <sup>o</sup> | ___ <sup>o</sup>  | ___ <sup>o</sup> | ___ <sup>o</sup> | ___ <sup>o</sup> |
| Extremely Low Birth Weight (<1000g)                      | No         | 215 (100)         | 43 (100)         | 6674 (96.5)          | 1321 (95.5)      | 2303 (96.6)       | 456 (95.6)       | 2045 (98.8)      | 410 (99)         | 1173 (99.4)       | 235 (99.6)       | 950 (100)         | 190 (100)        | 685 (100)         | 137 (100)        | 718 (99)          | 143 (98.6)       | 498 (98.6)        | 100 (99)         | 479 (98.8)        | 95 (97.9)        | 370 (100)        | 74 (100)         |
|                                                          | Yes        | 0 (0)             | 0 (0)            | 246 (3.6)            | 63 (4.6)         | 82 (3.4)          | 21 (4.4)         | 25 (1.2)         | ___ <sup>o</sup> | ___ <sup>o</sup>  | ___ <sup>o</sup> | 0 (0)             | 0 (0)            | 0 (0)             | 0 (0)            | ___ <sup>o</sup>  | ___ <sup>o</sup> | ___ <sup>o</sup>  | ___ <sup>o</sup> | ___ <sup>o</sup>  | ___ <sup>o</sup> | 0 (0)            | 0 (0)            |
| Chromosomal Anomalies                                    | No         | 215 (100)         | 43 (100)         | 6916 (99.9)          | 1383 (99.9)      | 2385 (100)        | 477 (100)        | 2070 (100)       | 414 (100)        | 1180 (100)        | 236 (100)        | 950 (100)         | 190 (100)        | 685 (100)         | 137 (100)        | 723 (99.7)        | 144 (99.3)       | 504 (99.8)        | 100 (99)         | 485 (100)         | 97 (100)         | 370 (100)        | 74 (100)         |
|                                                          | Yes        | 0 (0)             | 0 (0)            | ___ <sup>o</sup>     | ___ <sup>o</sup> | 0 (0)             | 0 (0)            | 0 (0)            | 0 (0)            | 0 (0)             | 0 (0)            | 0 (0)             | 0 (0)            | 0 (0)             | 0 (0)            | ___ <sup>o</sup>  | ___ <sup>o</sup> | ___ <sup>o</sup>  | ___ <sup>o</sup> | 0 (0)             | 0 (0)            | 0 (0)            | 0 (0)            |
| Congenital Anomalies of the Heart and Circulatory System | No         | 192 (89.3)        | 39 (90.7)        | 6507 (94)            | 1292 (93.4)      | 2284 (95.8)       | 456 (95.6)       | 1983 (95.8)      | 394 (95.2)       | 1121 (95)         | 224 (94.9)       | 908 (95.6)        | 183 (96.3)       | 667 (97.4)        | 135 (98.5)       | 715 (98.6)        | 142 (97.9)       | 498 (98.6)        | 99 (98)          | 481 (99.2)        | 95 (97.9)        | 365 (98.7)       | 73 (98.7)        |
|                                                          | Yes        | 23 (10.7)         | ___ <sup>o</sup> | 413 (6)              | 92 (6.7)         | 101 (4.2)         | 21 (4.4)         | 87 (4.2)         | 20 (4.8)         | 59 (5)            | 12 (5.1)         | 42 (4.4)          | ___ <sup>o</sup> | 18 (2.6)          | ___ <sup>o</sup> | ___ <sup>o</sup>  | ___ <sup>o</sup> | ___ <sup>o</sup>  | ___ <sup>o</sup> | ___ <sup>o</sup>  | ___ <sup>o</sup> | ___ <sup>o</sup> | ___ <sup>o</sup> |
| Congenital Anomalies of the Central Nervous System       | No         | 215 (100)         | 43 (100)         | 6897 (99.7)          | 1379 (99.6)      | 2380 (99.8)       | 476 (99.8)       | 2064 (99.7)      | 412 (99.5)       | 1174 (99.5)       | 235 (99.6)       | 950 (100)         | 190 (100)        | 677 (98.8)        | 136 (99.3)       | 725 (100)         | 145 (100)        | 505 (100)         | 101 (100)        | 479 (98.8)        | 96 (99)          | 370 (100)        | 74 (100)         |
|                                                          | Yes        | 0 (0)             | 0 (0)            | 23 (0.3)             | ___ <sup>o</sup> | ___ <sup>o</sup>  | ___ <sup>o</sup> | ___ <sup>o</sup> | ___ <sup>o</sup> | ___ <sup>o</sup>  | ___ <sup>o</sup> | 0 (0)             | 0 (0)            | ___ <sup>o</sup>  | ___ <sup>o</sup> | 0 (0)             | 0 (0)            | 0 (0)             | 0 (0)            | ___ <sup>o</sup>  | ___ <sup>o</sup> | 0 (0)            | 0 (0)            |
| Congenital Anomalies of the Eye                          | No         | 215 (100)         | 43 (100)         | 6898 (99.7)          | 1379 (99.6)      | 2373 (99.5)       | 475 (99.6)       | 2069 (100)       | 413 (99.8)       | 1170 (99.2)       | 235 (99.6)       | 934 (98.3)        | 187 (98.4)       | 679 (99.1)        | 136 (99.3)       | 725 (100)         | 145 (100)        | 502 (99.4)        | 100 (99)         | 485 (100)         | 97 (100)         | 370 (100)        | 74 (100)         |
|                                                          | Yes        | 0 (0)             | 0 (0)            | 22 (0.3)             | ___ <sup>o</sup> | 12 (0.5)          | ___ <sup>o</sup> | ___ <sup>o</sup> | ___ <sup>o</sup> | ___ <sup>o</sup>  | ___ <sup>o</sup> | 16 (1.7)          | ___ <sup>o</sup> | ___ <sup>o</sup>  | ___ <sup>o</sup> | 0 (0)             | 0 (0)            | ___ <sup>o</sup>  | ___ <sup>o</sup> | 0 (0)             | 0 (0)            | 0 (0)            | 0 (0)            |
| Congenital Anomalies of the Genital Organs               | No         | 200 (93)          | 39 (90.7)        | 6745 (97.5)          | 1350 (97.5)      | 2285 (95.8)       | 459 (96.2)       | 2017 (97.4)      | 400 (96.6)       | 1157 (98.1)       | 231 (97.9)       | 893 (94)          | 181 (95.3)       | 680 (99.3)        | 136 (99.3)       | 725 (100)         | 145 (100)        | 500 (99)          | 100 (99)         | 472 (97.3)        | 93 (95.9)        | 350 (94.6)       | 70 (94.6)        |
|                                                          | Yes        | 15 (7)            | ___ <sup>o</sup> | 175 (2.5)            | 34 (2.5)         | 100 (4.2)         | 18 (3.8)         | 53 (2.6)         | 14 (3.4)         | 23 (2)            | ___ <sup>o</sup> | 57 (6)            | ___ <sup>o</sup> | ___ <sup>o</sup>  | 0 (0)            | 0 (0)             | ___ <sup>o</sup> | ___ <sup>o</sup>  | 13 (2.7)         | ___ <sup>o</sup>  | 20 (5.4)         | ___ <sup>o</sup> |                  |
| Congenital Anomalies of the Digestive System             | No         | 215 (100)         | 43 (100)         | 6870 (99.3)          | 1375 (99.4)      | 2371 (99.4)       | 474 (99.4)       | 2062 (99.6)      | 412 (99.5)       | 1180 (100)        | 236 (100)        | 950 (100)         | 190 (100)        | 678 (99)          | 135 (98.5)       | 720 (99.3)        | 144 (99.3)       | 505 (100)         | 101 (100)        | 485 (100)         | 97 (100)         | 370 (100)        | 74 (100)         |
|                                                          | Yes        | 0 (0)             | 0 (0)            | 50 (0.7)             | ___ <sup>o</sup> | 14 (0.6)          | ___ <sup>o</sup> | ___ <sup>o</sup> | ___ <sup>o</sup> | 0 (0)             | 0 (0)            | 0 (0)             | 0 (0)            | ___ <sup>o</sup>  | ___ <sup>o</sup> | ___ <sup>o</sup>  | ___ <sup>o</sup> | 0 (0)             | 0 (0)            | 0 (0)             | 0 (0)            | 0 (0)            | 0 (0)            |
| Congenital Musculoskeletal Deformities                   | No         | 215 (100)         | 43 (100)         | 6793 (98.2)          | 1358 (98.1)      | 2342 (98.2)       | 466 (97.7)       |                  |                  |                   |                  |                   |                  |                   |                  |                   |                  |                   |                  |                   |                  |                  |                  |

|                                                                |     |            |           |             |             |             |            |             |            |             |            |            |            |            |            |            |            |            |           |            |           |            |           |
|----------------------------------------------------------------|-----|------------|-----------|-------------|-------------|-------------|------------|-------------|------------|-------------|------------|------------|------------|------------|------------|------------|------------|------------|-----------|------------|-----------|------------|-----------|
| Intrauterine Placental Insufficiency                           | No  | 209 (97.2) | 42 (97.7) | 6788 (98.1) | 1353 (97.8) | 2346 (98.4) | 470 (98.5) | 2015 (97.3) | 401 (96.9) | 1163 (98.6) | 232 (98.3) | 941 (99.1) | 188 (99)   | 674 (98.4) | 136 (99.3) | 723 (99.7) | 144 (99.3) | 504 (99.8) | 100 (99)  | 479 (98.8) | 95 (97.9) | 367 (99.2) | 73 (98.7) |
|                                                                | Yes | ___        | ___       | 132 (1.9)   | 31 (2.2)    | 39 (1.6)    | ___        | 55 (2.7)    | 13 (3.1)   | 17 (1.4)    | ___        | ___        | ___        | 11 (1.6)   | ___        | ___        | ___        | ___        | ___       | ___        | ___       | ___        | ___       |
| Infectious Disease (Acute)                                     | No  | 215 (100)  | 42 (97.7) | 6086 (88)   | 1222 (88.3) | 1800 (75.5) | 353 (74)   | 1214 (58.7) | 245 (59.2) | 648 (54.9)  | 124 (52.5) | 421 (44.3) | 88 (46.3)  | 227 (33.1) | 47 (34.3)  | 265 (36.6) | 57 (39.3)  | 176 (34.9) | 35 (34.7) | 151 (31.1) | 29 (29.9) | 110 (29.7) | 24 (32.4) |
|                                                                | Yes | 0 (0)      | ___       | 834 (12.1)  | 162 (11.7)  | 585 (24.5)  | 124 (26)   | 856 (41.4)  | 169 (40.8) | 532 (45.1)  | 112 (47.5) | 529 (55.7) | 102 (53.7) | 458 (66.9) | 90 (65.7)  | 460 (63.5) | 88 (60.7)  | 329 (65.2) | 66 (65.4) | 334 (68.9) | 68 (70.1) | 260 (70.3) | 50 (67.6) |
| Neoplasm (Acute)                                               | No  | 215 (100)  | 43 (100)  | 6836 (98.8) | 1371 (99.1) | 2365 (99.2) | 471 (98.7) | 2057 (99.4) | 410 (99)   | 1180 (100)  | 236 (100)  | 924 (97.3) | 186 (97.9) | 681 (99.4) | 136 (99.3) | 725 (100)  | 145 (100)  | 491 (97.2) | 98 (97)   | 475 (97.9) | 94 (96.9) | 341 (92.2) | 69 (93.2) |
|                                                                | Yes | 0 (0)      | 0 (0)     | 84 (1.2)    | 13 (0.9)    | 20 (0.8)    | ___        | 13 (0.6)    | ___        | 0 (0)       | 0 (0)      | 26 (2.7)   | ___        | ___        | ___        | 0 (0)      | 0 (0)      | 14 (2.8)   | ___       | ___        | ___       | 29 (7.8)   | ___       |
| Endocrine, metabolic, and immunity disorders (Acute)           | No  | 215 (100)  | 43 (100)  | 6706 (96.9) | 1341 (96.9) | 2320 (97.3) | 457 (95.8) | 1986 (95.9) | 392 (94.7) | 1111 (94.2) | 219 (92.8) | 920 (96.8) | 186 (97.9) | 660 (96.4) | 133 (97.1) | 699 (96.4) | 141 (97.2) | 476 (94.3) | 94 (93.1) | 476 (98.1) | 94 (96.9) | 324 (87.6) | 65 (87.8) |
|                                                                | Yes | 0 (0)      | 0 (0)     | 214 (3.1)   | 43 (3.1)    | 65 (2.7)    | 20 (4.2)   | 84 (4.1)    | 22 (5.3)   | 69 (5.9)    | 17 (7.2)   | 30 (3.2)   | ___        | 25 (3.7)   | ___        | 26 (3.6)   | ___        | 29 (5.7)   | ___       | ___        | ___       | 46 (12.4)  | ___       |
| Diseases of blood and blood-forming organs (Acute)             | No  | 215 (100)  | 43 (100)  | 6833 (98.7) | 1364 (98.6) | 2336 (98)   | 467 (97.9) | 1880 (90.8) | 379 (91.6) | 1047 (88.7) | 208 (88.1) | 895 (94.2) | 176 (92.6) | 592 (86.4) | 121 (88.3) | 589 (81.2) | 121 (83.5) | 412 (81.6) | 82 (81.2) | 418 (86.2) | 82 (84.5) | 285 (77)   | 55 (74.3) |
|                                                                | Yes | 0 (0)      | 0 (0)     | 87 (1.3)    | 20 (1.5)    | 49 (2.1)    | ___        | 190 (9.2)   | 35 (8.5)   | 133 (11.3)  | 28 (11.9)  | 55 (5.8)   | 14 (7.4)   | 93 (13.6)  | 16 (11.7)  | 136 (18.8) | 24 (16.6)  | 93 (18.4)  | 19 (18.8) | 67 (13.8)  | 15 (15.5) | 85 (23)    | 19 (25.7) |
| Diseases of the nervous system and sense organs (Acute)        | No  | 208 (96.7) | 42 (97.7) | 6507 (94)   | 1290 (93.2) | 1810 (75.9) | 354 (74.2) | 1058 (51.1) | 218 (52.7) | 577 (48.9)  | 117 (49.6) | 359 (37.8) | 71 (37.4)  | 203 (29.6) | 46 (33.6)  | 195 (26.9) | 39 (26.9)  | 107 (21.2) | 28 (27.7) | 103 (21.2) | 20 (20.6) | 75 (20.3)  | 14 (18.9) |
|                                                                | Yes | ___        | ___       | 413 (6)     | 94 (6.8)    | 575 (24.1)  | 123 (25.8) | 1012 (48.9) | 196 (47.3) | 603 (51.1)  | 119 (50.4) | 591 (62.2) | 119 (62.6) | 482 (70.4) | 91 (66.4)  | 530 (73.1) | 106 (73.1) | 398 (78.8) | 73 (72.3) | 382 (78.8) | 77 (79.4) | 295 (79.7) | 60 (81.1) |
| Diseases of the circulatory system (Acute)                     | No  | 215 (100)  | 43 (100)  | 6860 (99.1) | 1371 (99.1) | 2381 (99.8) | 476 (99.8) | 2064 (99.7) | 413 (99.8) | 1151 (97.5) | 231 (97.9) | 944 (99.4) | 189 (99.5) | 679 (99.1) | 136 (99.3) | 722 (99.6) | 144 (99.3) | 482 (95.5) | 96 (95.1) | 472 (97.3) | 95 (97.9) | 370 (100)  | 74 (100)  |
|                                                                | Yes | 0 (0)      | 0 (0)     | 60 (0.9)    | 13 (0.9)    | ___         | ___        | 29 (2.5)    | ___        | ___         | ___        | ___        | ___        | ___        | ___        | ___        | ___        | 23 (4.6)   | ___       | ___        | ___       | 0 (0)      | 0 (0)     |
| Diseases of the respiratory system (Acute)                     | No  | 214 (99.5) | 42 (97.7) | 5618 (81.2) | 1109 (80.1) | 1131 (47.4) | 224 (47)   | 826 (39.9)  | 152 (36.7) | 321 (27.2)  | 67 (28.4)  | 175 (18.4) | 37 (19.5)  | 127 (18.5) | 28 (20.4)  | 127 (17.5) | 26 (17.9)  | 84 (16.6)  | 18 (17.8) | 44 (9.1)   | 12 (12.4) | 23 (6.2)   | ___       |
|                                                                | Yes | ___        | ___       | 1302 (18.8) | 275 (19.9)  | 1254 (52.6) | 253 (53)   | 1244 (60.1) | 262 (63.3) | 859 (72.8)  | 169 (71.6) | 775 (81.6) | 153 (80.5) | 558 (81.5) | 109 (79.6) | 598 (82.5) | 119 (82.1) | 421 (83.4) | 83 (82.2) | 441 (90.9) | 85 (87.6) | 347 (93.8) | 69 (93.2) |
| Diseases of the digestive system (Acute)                       | No  | 158 (73.5) | 33 (76.7) | 5136 (74.2) | 1041 (75.2) | 1560 (65.4) | 306 (64.2) | 1217 (58.8) | 247 (59.7) | 586 (49.7)  | 118 (50)   | 505 (53.2) | 104 (54.7) | 348 (50.8) | 69 (50.4)  | 355 (49)   | 75 (51.7)  | 230 (45.5) | 47 (46.5) | 224 (46.2) | 44 (45.4) | 102 (27.6) | 21 (28.4) |
|                                                                | Yes | 57 (26.5)  | ___       | 1784 (25.8) | 343 (24.8)  | 825 (34.6)  | 171 (35.9) | 853 (41.2)  | 167 (40.3) | 594 (50.3)  | 118 (50)   | 445 (46.8) | 86 (45.3)  | 337 (49.2) | 68 (49.6)  | 370 (51)   | 70 (48.3)  | 275 (54.5) | 54 (53.5) | 261 (53.8) | 53 (54.6) | 268 (72.4) | 53 (71.6) |
| Diseases of the genitourinary system (Acute)                   | No  | 191 (88.8) | 37 (86.1) | 6191 (89.5) | 1248 (90.2) | 1911 (80.1) | 391 (82)   | 1585 (76.6) | 322 (77.8) | 886 (75.1)  | 177 (75)   | 655 (69)   | 132 (69.5) | 442 (64.5) | 93 (67.9)  | 553 (76.3) | 108 (74.5) | 420 (83.2) | 80 (79.2) | 382 (78.8) | 74 (76.3) | 191 (51.6) | 40 (54.1) |
|                                                                | Yes | 24 (11.2)  | ___       | 729 (10.5)  | 136 (9.8)   | 474 (19.9)  | 86 (18)    | 485 (23.4)  | 92 (22.2)  | 294 (24.9)  | 59 (25)    | 295 (31.1) | 58 (30.5)  | 243 (35.5) | 44 (32.1)  | 172 (23.7) | 37 (25.5)  | 85 (16.8)  | 21 (20.8) | 103 (21.2) | 23 (23.7) | 179 (48.4) | 34 (46)   |
| Diseases of the skin and subcutaneous tissue (Acute)           | No  | 213 (99.1) | 42 (97.7) | 6284 (90.8) | 1259 (91)   | 2055 (86.2) | 399 (83.7) | 1590 (76.8) | 315 (76.1) | 775 (65.7)  | 153 (64.8) | 673 (70.8) | 138 (72.6) | 409 (59.7) | 83 (60.6)  | 433 (59.7) | 91 (62.8)  | 269 (53.3) | 56 (55.5) | 309 (63.7) | 61 (62.9) | 173 (46.8) | 35 (47.3) |
|                                                                | Yes | ___        | ___       | 636 (9.2)   | 125 (9)     | 330 (13.8)  | 78 (16.4)  | 480 (23.2)  | 99 (23.9)  | 405 (34.3)  | 83 (35.2)  | 277 (29.2) | 52 (27.4)  | 276 (40.3) | 54 (39.4)  | 292 (40.3) | 54 (37.2)  | 236 (46.7) | 45 (44.6) | 176 (36.3) | 36 (37.1) | 197 (53.2) | 39 (52.7) |
| Diseases of the musculoskeletal system (Acute)                 | No  | 215 (100)  | 43 (100)  | 6797 (98.2) | 1360 (98.3) | 2299 (96.4) | 458 (96)   | 1986 (95.9) | 396 (95.7) | 1098 (93.1) | 218 (92.4) | 889 (93.6) | 176 (92.6) | 642 (93.7) | 130 (94.9) | 634 (87.5) | 125 (86.2) | 437 (86.5) | 86 (85.2) | 455 (93.8) | 90 (92.8) | 335 (90.5) | 64 (86.5) |
|                                                                | Yes | 0 (0)      | 0 (0)     | 123 (1.8)   | 24 (1.7)    | 86 (3.6)    | 19 (4)     | 84 (4.1)    | 18 (4.4)   | 82 (7)      | 18 (7.6)   | 61 (6.4)   | 14 (7.4)   | 43 (6.3)   | ___        | 91 (12.6)  | 20 (13.8)  | 68 (13.5)  | 15 (14.9) | 30 (6.2)   | ___       | 35 (9.5)   | ___       |
| Congenital anomalies                                           | No  | 165 (76.7) | 32 (74.4) | 5761 (83.3) | 1155 (83.5) | 1967 (82.5) | 389 (81.6) | 1673 (80.8) | 328 (79.2) | 967 (82)    | 193 (81.8) | 738 (77.7) | 148 (77.9) | 565 (82.5) | 113 (82.5) | 652 (89.9) | 127 (87.6) | 435 (86.1) | 82 (81.2) | 419 (86.4) | 81 (83.5) | 304 (82.2) | 60 (81.1) |
|                                                                | Yes | 50 (23.3)  | 11 (25.6) | 1159 (16.6) | 229 (16.6)  | 418 (17.5)  | 88 (18.5)  | 397 (19.2)  | 86 (20.8)  | 213 (18.1)  | 43 (18.2)  | 212 (22.3) | 42 (22.1)  | 120 (17.5) | 24 (17.5)  | 73 (10.1)  | 18 (12.4)  | 70 (13.9)  | 19 (18.8) | 66 (13.6)  | 16 (16.5) | 66 (17.8)  | 14 (18.9) |
| Certain conditions originating in the perinatal period (Acute) | No  | 131 (60.9) | 24 (55.8) | 2348 (33.9) | 462 (33.4)  | 1062 (44.5) | 203 (42.6) | 1008 (48.7) | 190 (45.9) | 668 (56.6)  | 130 (55.1) | 475 (50)   | 95 (50)    | 345 (50.4) | 69 (50.4)  | 348 (48)   | 74 (51)    | 267 (52.9) | 54 (53.5) | 253 (52.2) | 50 (51.6) | 199 (53.8) | 35 (47.3) |
|                                                                | Yes | 84 (39.1)  | 19 (44.2) | 4572 (66.1) | 922 (66.6)  | 1323 (55.5) | 274 (57.4) | 1062 (51.3) | 224 (54.1) | 512 (43.4)  | 106 (44.9) | 475 (50)   | 95 (50)    | 340 (49.6) | 68 (49.6)  | 377 (52)   | 71 (49)    | 238 (47.1) | 47 (46.5) | 232 (47.8) | 47 (48.5) | 171 (46.2) | 39 (52.7) |
| Injury and poisoning (Acute)                                   | No  | 215 (100)  | 43 (100)  | 6614 (95.6) | 1322 (95.5) | 2205 (92.5) | 441 (92.5) | 1729 (83.5) | 344 (83.1) | 891 (75.5)  | 174 (73.7) | 614 (64.6) | 128 (67.4) | 428 (62.5) | 83 (60.6)  | 424 (58.5) | 87 (60)    | 272 (53.9) | 57 (56.4) | 229 (47.2) | 44 (45.4) | 197 (53.2) | 38 (51.4) |
|                                                                | Yes | 0 (0)      | 0 (0)     | 306 (4.4)   | 62 (4.5)    | 180 (7.6)   | 36 (7.6)   | 341 (16.5)  | 70 (16.9)  | 289 (24.5)  | 62 (26.3)  | 336 (35.4) | 62 (32.6)  | 257 (37.5) | 54 (39.4)  | 301 (41.5) | 58 (40)    | 233 (46.1) | 44 (43.6) | 256 (52.8) | 53 (54.6) | 173 (46.8) | 36 (48.7) |
| Infectious Disease (Chronic)                                   | No  | 215 (100)  | 43 (100)  | 6910 (99.9) | 1382 (99.9) | 2385 (100)  | 477 (100)  | 2070 (100)  | 414 (100)  | 1180 (100)  | 236 (100)  | 950 (100)  | 190 (100)  | 685 (100)  | 137 (100)  | 725 (100)  | 145 (100)  | 505 (100)  | 101 (100) | 485 (100)  | 97 (100)  | 370 (100)  | 74 (100)  |
|                                                                | Yes | 0 (0)      | 0 (0)     | ___         | ___         | 0 (0)       | 0 (0)      | 0 (0)       | 0 (0)      | 0 (0)       | 0 (0)      | 0 (0)      | 0 (0)      | 0 (0)      | 0 (0)      | 0 (0)      | 0 (0)      | 0 (0)      | 0 (0)     | 0 (0)      | 0 (0)     | 0 (0)      | 0 (0)     |
| Neoplasm (Chronic)                                             | No  | 215 (100)  | 43 (100)  | 6898 (99.7) | 1378 (99.6) | 2376 (99.6) | 475 (99.6) | 2070 (100)  | 414 (100)  | 1180 (100)  | 236 (100)  | 950 (100)  | 190 (100)  | 685 (100)  | 137 (100)  | 725 (100)  | 145 (100)  | 505 (100)  | 101 (100) | 485 (100)  | 97 (100)  | 360 (97.3) | 73 (98.7) |
|                                                                | Yes | 0 (0)      | 0 (0)     | 22 (0.3)    | ___         | ___         | ___        | 0 (0)       | 0 (0)      | 0 (0)       | 0 (0)      | 0 (0)      | 0 (0)      | 0 (0)      | 0 (0)      | 0 (0)      | 0 (0)      | 0 (0)      | 0 (0)     | 0 (0)      | 0 (0)     | ___        | ___       |
| Endocrine, metabolic, and immunity disorders (Chronic)         | No  | 209 (97.2) | 42 (97.7) | 6745 (97.5) | 1346 (97.3) | 2331 (97.7) | 463 (97.1) | 1991 (96.2) | 397 (95.9) | 1158 (98.1) | 231 (97.9) | 916 (96.4) | 182 (95.8) | 672 (98.1) | 134 (97.8) | 713 (98.3) | 141 (97.2) | 479 (94.9) | 95 (94.1) | 451 (93)   | 91 (93.8) | 337 (91.1) | 66 (89.2) |
|                                                                | Yes | ___        | ___       | 175 (2.5)   | 38 (2.8)    | 54 (2.3)    | 14 (2.9)   | 79 (3.8)    | 17 (4.1)   | 22 (1.9)    | ___        | 34 (3.6)   | ___        | 13 (1.9)   | ___        | 12 (1.7)   | ___        | 26 (5.2)   | ___       | 34 (7)     | ___       | 33 (8.9)   | ___       |
| Diseases of blood and blood-forming organs (Chronic)           | No  | 215 (100)  | 43 (100)  | 6825 (98.6) | 1363 (98.5) | 2339 (98.1) | 467 (97.9) | 2042 (97.8) | 407 (98.3) | 1174 (99.5) | 235 (99.6) | 929 (97.8) | 185 (97.4) | 670 (97.8) | 135 (98.5) | 696 (96)   | 139 (95.9) | 505 (100)  | 101 (100) | 464 (95.7) | 93 (95.9) | 355 (96)   | 71 (96)   |
|                                                                | Yes | 0 (0)      | 0 (0)     | 95 (1.4)    | 21 (1.5)    | 46 (1.9)    | ___        | 28 (1.4)    | ___        | ___         | ___        | 21 (2.2)   | ___        | 15 (2.2)   | ___        | 29 (4)     | ___        | 0 (0)      | 0 (0)     | 21 (4.3)   | ___       | 15 (4.1)   | ___       |
| Diseases of the nervous system and sense organs (Chronic)      | No  | 215 (100)  | 43 (100)  | 6201 (89.6) | 1226 (88.6) | 2140 (89.7) | 422 (88.5) | 1889 (91.3) | 371 (89.6) | 1105 (93.6) | 216 (91.5) | 838 (88.2) | 167 (87.9) | 629 (91.8) | 122 (89.1) | 672 (92.7) | 132 (91)   | 424 (84)   | 86 (85.2) | 431 (88.9) | 81 (83.5) | 313 (84.6) | 61 (82.4) |
|                                                                | Yes | 0 (0)      | 0 (0)     | 719 (10.4)  | 158 (11.4)  | 245 (10.3)  | 55 (11.5)  | 181 (8.7)   | 43 (10.4)  | 75 (6.4)    | 20 (8.5)   | 112 (11.8) | 23 (12.1)  | 56 (8.2)   | 15 (11)    | 53 (7.3)   | 13 (9)     | 81 (16)    | 15 (14.9) | 54 (11.1)  | 16 (16.5) | 57 (15.4)  | 13 (17.6) |
| Diseases of the circulatory system (Chronic)                   | No  | 215 (100)  | 43 (100)  | 6682 (96.6) | 1334 (96.4) | 2322 (97.4) | 459 (96.2) | 2013 (97.3) | 399 (96.4) | 1151 (97.5) | 232 (98.3) | 922 (97.1) | 184 (96.8) | 647 (94.5) | 130 (94.9) | 689 (95)   | 137 (94.5) | 487 (96.4) | 97 (96)   | 469 (96.7) | 93 (95.9) | 364 (98.4) | 73 (98.7) |
|                                                                | Yes | 0 (0)      | 0 (0)     | 238 (3.4)   | 50 (3.6)    | 63 (2.6)    | 18 (3.8)   | 57 (2.8     |            |             |            |            |            |            |            |            |            |            |           |            |           |            |           |

**Table 11: Characteristics of NY Circumcision Matched Cohorts by Age at Exposure**

|                                                          |            | >28 days - ≤6 months |             | >6 months - ≤1 yr |             | >1 yr - ≤1.5 yrs |             | >1.5 yrs - ≤2 yrs |             | >2 yrs - ≤2.5 yrs |             | >2.5 yrs - ≤3 yrs |             | >3 yrs - ≤3.5 yrs |             | >3.5 yrs - ≤4 yrs |             | >4 yrs - ≤4.5 yrs |             | >4.5 yrs - ≤5 yrs |             |
|----------------------------------------------------------|------------|----------------------|-------------|-------------------|-------------|------------------|-------------|-------------------|-------------|-------------------|-------------|-------------------|-------------|-------------------|-------------|-------------------|-------------|-------------------|-------------|-------------------|-------------|
|                                                          |            | Exposure             |             | Exposure          |             | Exposure         |             | Exposure          |             | Exposure          |             | Exposure          |             | Exposure          |             | Exposure          |             | Exposure          |             | Exposure          |             |
|                                                          |            | No<br>n(%)           | Yes<br>n(%) | No<br>n(%)        | Yes<br>n(%) | No<br>n(%)       | Yes<br>n(%) | No<br>n(%)        | Yes<br>n(%) | No<br>n(%)        | Yes<br>n(%) | No<br>n(%)        | Yes<br>n(%) | No<br>n(%)        | Yes<br>n(%) | No<br>n(%)        | Yes<br>n(%) | No<br>n(%)        | Yes<br>n(%) | No<br>n(%)        | Yes<br>n(%) |
| Sex                                                      | Female     | 0 (0)                | 0 (0)       | 0 (0)             | 0 (0)       | 0 (0)            | 0 (0)       | 0 (0)             | 0 (0)       | 0 (0)             | 0 (0)       | 0 (0)             | 0 (0)       | 0 (0)             | 0 (0)       | 0 (0)             | 0 (0)       | 0 (0)             | 0 (0)       | 0 (0)             | 0 (0)       |
|                                                          | Male       | 2745 (100)           | 549 (100)   | 4785 (100)        | 957 (100)   | 4395 (100)       | 879 (100)   | 2425 (100)        | 485 (100)   | 1520 (100)        | 304 (100)   | 1075 (100)        | 215 (100)   | 750 (100)         | 150 (100)   | 625 (100)         | 125 (100)   | 650 (100)         | 130 (100)   | 380 (100)         | 76 (100)    |
| Race                                                     | White      | 560 (20.4)           | 118 (21.5)  | 1373 (28.7)       | 265 (27.7)  | 976 (22.2)       | 199 (22.6)  | 474 (19.6)        | 108 (22.3)  | 249 (16.4)        | 60 (19.7)   | 251 (23.4)        | 51 (23.7)   | 144 (19.2)        | 29 (19.3)   | 95 (15.2)         | 19 (15.2)   | 133 (20.5)        | 32 (24.6)   | 82 (21.6)         | 15 (19.7)   |
|                                                          | Black      | 1262 (46)            | 243 (44.3)  | 1850 (38.7)       | 357 (37.3)  | 1764 (40.1)      | 342 (38.9)  | 997 (41.1)        | 196 (40.4)  | 558 (36.7)        | 105 (34.5)  | 342 (31.8)        | 71 (33)     | 198 (26.4)        | 42 (28)     | 186 (29.8)        | 35 (28)     | 237 (36.5)        | 40 (30.8)   | 94 (24.7)         | 19 (25)     |
|                                                          | Hispanic   | 301 (11)             | 59 (10.8)   | 600 (12.5)        | 134 (14)    | 550 (12.5)       | 115 (13.1)  | 436 (18)          | 82 (16.9)   | 379 (24.9)        | 71 (23.4)   | 262 (24.4)        | 50 (23.3)   | 235 (31.3)        | 46 (30.7)   | 181 (29)          | 37 (29.6)   | 130 (20)          | 29 (22.3)   | 127 (33.4)        | 24 (31.6)   |
|                                                          | Other      | 622 (22.7)           | 129 (23.5)  | 962 (20.1)        | 201 (21)    | 1105 (25.1)      | 223 (25.4)  | 518 (21.4)        | 99 (20.4)   | 334 (22)          | 68 (22.4)   | 220 (20.5)        | 43 (20)     | 173 (23.1)        | 33 (22)     | 163 (26.1)        | 34 (27.2)   | 150 (23.1)        | 29 (22.3)   | 77 (20.3)         | 18 (23.7)   |
| Income Based on ZIP Code of Residence (quartile)         | Quartile 1 | 903 (32.9)           | 179 (32.6)  | 1552 (32.4)       | 306 (32)    | 1605 (36.5)      | 303 (34.5)  | 706 (29.1)        | 149 (30.7)  | 544 (35.8)        | 98 (32.2)   | 361 (33.6)        | 65 (30.2)   | 255 (34)          | 47 (31.3)   | 184 (29.4)        | 38 (30.4)   | 201 (30.9)        | 40 (30.8)   | 69 (18.2)         | 18 (23.7)   |
|                                                          | Quartile 2 | 757 (27.6)           | 158 (28.8)  | 1125 (23.5)       | 225 (23.5)  | 1195 (27.2)      | 229 (26.1)  | 781 (32.2)        | 150 (30.9)  | 343 (22.6)        | 71 (23.4)   | 307 (28.6)        | 64 (29.8)   | 172 (22.9)        | 36 (24)     | 159 (25.4)        | 29 (23.2)   | 157 (24.2)        | 32 (24.6)   | 91 (24)           | 21 (27.6)   |
|                                                          | Quartile 3 | 508 (18.5)           | 107 (19.5)  | 1071 (22.4)       | 211 (22.1)  | 813 (18.5)       | 175 (19.9)  | 490 (20.2)        | 94 (19.4)   | 348 (22.9)        | 68 (22.4)   | 253 (23.5)        | 49 (22.8)   | 217 (28.9)        | 44 (29.3)   | 162 (25.9)        | 33 (26.4)   | 174 (26.8)        | 32 (24.6)   | 93 (24.5)         | 16 (21.1)   |
|                                                          | Quartile 4 | 577 (21)             | 105 (19.1)  | 1037 (21.7)       | 215 (22.5)  | 782 (17.8)       | 172 (19.6)  | 448 (18.5)        | 92 (19)     | 285 (18.8)        | 67 (22)     | 154 (14.3)        | 37 (17.2)   | 106 (14.1)        | 23 (15.3)   | 120 (19.2)        | 25 (20)     | 118 (18.2)        | 26 (20)     | 127 (33.4)        | 21 (27.6)   |
| Number of Outpatient Visits (quartile)                   | Quartile 1 | 0 (0)                | 0 (0)       | 620 (13)          | 118 (12.3)  | 757 (17.2)       | 147 (16.7)  | 359 (14.8)        | 78 (16.1)   | 291 (19.1)        | 62 (20.4)   | 209 (19.4)        | 46 (21.4)   | 152 (20.3)        | 31 (20.7)   | 140 (22.4)        | 28 (22.4)   | 104 (16)          | 19 (14.6)   | 51 (13.4)         | ___         |
|                                                          | Quartile 2 | 1449 (52.8)          | 285 (51.9)  | 1070 (22.4)       | 214 (22.4)  | 937 (21.3)       | 187 (21.3)  | 700 (28.9)        | 144 (29.7)  | 430 (28.3)        | 77 (25.3)   | 271 (25.2)        | 49 (22.8)   | 207 (27.6)        | 40 (26.7)   | 168 (26.9)        | 35 (28)     | 117 (18)          | 25 (19.2)   | 97 (25.5)         | 22 (29)     |
|                                                          | Quartile 3 | 283 (10.3)           | 56 (10.2)   | 1156 (24.2)       | 243 (25.4)  | 1283 (29.2)      | 262 (29.8)  | 753 (31.1)        | 136 (28)    | 361 (23.8)        | 77 (25.3)   | 292 (27.2)        | 59 (27.4)   | 176 (23.5)        | 36 (24)     | 156 (25)          | 28 (22.4)   | 230 (35.4)        | 46 (35.4)   | 121 (31.8)        | 24 (31.6)   |
|                                                          | Quartile 4 | 1013 (36.9)          | 208 (37.9)  | 1939 (40.5)       | 382 (39.9)  | 1418 (32.3)      | 283 (32.2)  | 613 (25.3)        | 127 (26.2)  | 438 (28.8)        | 88 (29)     | 303 (28.2)        | 61 (28.4)   | 215 (28.7)        | 43 (28.7)   | 161 (25.8)        | 34 (27.2)   | 199 (30.6)        | 40 (30.8)   | 111 (29.2)        | 22 (29)     |
| Total Number of Inpatient Stays (n)                      | 0          | 0 (0)                | 0 (0)       | 0 (0)             | 0 (0)       | 0 (0)            | 0 (0)       | 0 (0)             | 0 (0)       | 0 (0)             | 0 (0)       | 0 (0)             | 0 (0)       | 0 (0)             | 0 (0)       | 0 (0)             | 0 (0)       | 0 (0)             | 0 (0)       | 0 (0)             | 0 (0)       |
|                                                          | 1          | 2440 (88.9)          | 478 (87.1)  | 3896 (81.4)       | 765 (79.9)  | 3490 (79.4)      | 698 (79.4)  | 1881 (77.6)       | 368 (75.9)  | 1201 (79)         | 231 (76)    | 798 (74.2)        | 156 (72.6)  | 460 (61.3)        | 91 (60.7)   | 438 (70.1)        | 89 (71.2)   | 424 (65.2)        | 83 (63.9)   | 275 (72.4)        | 52 (68.4)   |
|                                                          | 2          | 184 (6.7)            | 43 (7.8)    | 695 (14.5)        | 149 (15.6)  | 717 (16.3)       | 143 (16.3)  | 373 (15.4)        | 82 (16.9)   | 207 (13.6)        | 48 (15.8)   | 214 (19.9)        | 42 (19.5)   | 184 (24.5)        | 38 (25.3)   | 133 (21.3)        | 26 (20.8)   | 162 (24.9)        | 34 (26.2)   | 72 (19)           | 17 (22.4)   |
|                                                          | 3 or more  | 121 (4.4)            | 28 (5.1)    | 194 (4.1)         | 43 (4.5)    | 188 (4.3)        | 38 (4.3)    | 171 (7.1)         | 35 (7.2)    | 112 (7.4)         | 25 (8.2)    | 63 (5.9)          | 17 (7.9)    | 106 (14.1)        | 21 (14)     | 54 (8.6)          | ___         | 64 (9.9)          | 13 (10)     | 33 (8.7)          | ___         |
| <36 Weeks Gestational Age                                | No         | 2535 (92.4)          | 501 (91.3)  | 4191 (87.6)       | 830 (86.7)  | 3882 (88.3)      | 769 (87.5)  | 2106 (86.9)       | 426 (87.8)  | 1406 (92.5)       | 281 (92.4)  | 964 (89.7)        | 195 (90.7)  | 724 (96.5)        | 145 (96.7)  | 579 (92.6)        | 115 (92)    | 635 (97.7)        | 127 (97.7)  | 364 (95.8)        | 73 (96.1)   |
|                                                          | Yes        | 210 (7.7)            | 48 (8.7)    | 594 (12.4)        | 127 (13.3)  | 513 (11.7)       | 110 (12.5)  | 319 (13.2)        | 59 (12.2)   | 114 (7.5)         | 23 (7.6)    | 111 (10.3)        | 20 (9.3)    | 26 (3.5)          | ___         | 46 (7.4)          | ___         | 15 (2.3)          | ___         | 16 (4.2)          | ___         |
| Low Birth Weight (<2500g and ≥1500g)                     | No         | 2550 (92.9)          | 509 (92.7)  | 4242 (88.7)       | 850 (88.8)  | 3882 (88.3)      | 774 (88.1)  | 2149 (88.6)       | 437 (90.1)  | 1432 (94.2)       | 284 (93.4)  | 1005 (93.5)       | 199 (92.6)  | 701 (93.5)        | 142 (94.7)  | 580 (92.8)        | 115 (92)    | 621 (95.5)        | 124 (95.4)  | 333 (87.6)        | 67 (88.2)   |
|                                                          | Yes        | 195 (7.1)            | 40 (7.3)    | 543 (11.4)        | 107 (11.2)  | 513 (11.7)       | 105 (12)    | 276 (11.4)        | 48 (9.9)    | 88 (5.8)          | 20 (6.6)    | 70 (6.5)          | 16 (7.4)    | 49 (6.5)          | ___         | 45 (7.2)          | ___         | 29 (4.5)          | ___         | 47 (12.4)         | ___         |
| Very Low Birth Weight (<1500g and ≥1000g)                | No         | 2679 (97.6)          | 535 (97.5)  | 4702 (98.3)       | 938 (98)    | 4327 (98.5)      | 866 (98.5)  | 2375 (97.9)       | 475 (97.9)  | 1492 (98.2)       | 299 (98.4)  | 1046 (97.3)       | 211 (98.1)  | 739 (98.5)        | 148 (98.7)  | 616 (98.6)        | 123 (98.4)  | 650 (100)         | 130 (100)   | 367 (96.6)        | 74 (97.4)   |
|                                                          | Yes        | 66 (2.4)             | 14 (2.6)    | 83 (1.7)          | 19 (2)      | 68 (1.6)         | 13 (1.5)    | 50 (2.1)          | ___         | 28 (1.8)          | ___         | 29 (2.7)          | ___         | 11 (1.5)          | ___         | ___               | ___         | 0 (0)             | 0 (0)       | 13 (3.4)          | ___         |
| Extremely Low Birth Weight (<1000g)                      | No         | 2728 (99.4)          | 544 (99.1)  | 4758 (99.4)       | 951 (99.4)  | 4375 (99.5)      | 874 (99.4)  | 2423 (99.9)       | 484 (99.8)  | 1507 (99.1)       | 302 (99.3)  | 1067 (99.3)       | 214 (99.5)  | 742 (98.9)        | 149 (99.3)  | 619 (99)          | 124 (99.2)  | 641 (98.6)        | 129 (99.2)  | 380 (100)         | 76 (100)    |
|                                                          | Yes        | 17 (0.6)             | ___         | 27 (0.6)          | ___         | 20 (0.5)         | ___         | ___               | ___         | 13 (0.9)          | ___         | ___               | ___         | ___               | ___         | ___               | ___         | ___               | ___         | 0 (0)             | 0 (0)       |
| Chromosomal Anomalies                                    | No         | 2745 (100)           | 549 (100)   | 4769 (99.7)       | 954 (99.7)  | 4384 (99.8)      | 876 (99.7)  | 2425 (100)        | 485 (100)   | 1520 (100)        | 304 (100)   | 1075 (100)        | 215 (100)   | 746 (99.5)        | 149 (99.3)  | 625 (100)         | 125 (100)   | 650 (100)         | 130 (100)   | 380 (100)         | 76 (100)    |
|                                                          | Yes        | 0 (0)                | 0 (0)       | 16 (0.3)          | ___         | 11 (0.3)         | ___         | 0 (0)             | 0 (0)       | 0 (0)             | 0 (0)       | 0 (0)             | 0 (0)       | ___               | ___         | 0 (0)             | 0 (0)       | 0 (0)             | 0 (0)       | 0 (0)             | 0 (0)       |
| Congenital Anomalies of the Heart and Circulatory System | No         | 2628 (95.7)          | 524 (95.5)  | 4541 (94.9)       | 906 (94.7)  | 4171 (94.9)      | 833 (94.8)  | 2320 (95.7)       | 460 (94.9)  | 1487 (97.8)       | 297 (97.7)  | 1025 (95.4)       | 208 (96.7)  | 723 (96.4)        | 145 (96.7)  | 602 (96.3)        | 121 (96.8)  | 644 (99.1)        | 128 (98.5)  | 376 (99)          | 75 (98.7)   |
|                                                          | Yes        | 117 (4.3)            | 25 (4.6)    | 244 (5.1)         | 51 (5.3)    | 224 (5.1)        | 46 (5.2)    | 105 (4.3)         | 25 (5.2)    | 33 (2.2)          | ___         | 50 (4.7)          | ___         | 27 (3.6)          | ___         | 23 (3.7)          | ___         | ___               | ___         | ___               | ___         |
| Congenital Anomalies of the Central Nervous System       | No         | 2739 (99.8)          | 547 (99.6)  | 4769 (99.7)       | 954 (99.7)  | 4395 (100)       | 879 (100)   | 2419 (99.8)       | 483 (99.6)  | 1520 (100)        | 304 (100)   | 1075 (100)        | 215 (100)   | 750 (100)         | 150 (100)   | 618 (98.9)        | 124 (99.2)  | 644 (99.1)        | 129 (99.2)  | 380 (100)         | 76 (100)    |
|                                                          | Yes        | ___                  | ___         | 16 (0.3)          | ___         | 0 (0)            | 0 (0)       | ___               | ___         | 0 (0)             | 0 (0)       | 0 (0)             | 0 (0)       | 0 (0)             | 0 (0)       | ___               | ___         | ___               | ___         | 0 (0)             | 0 (0)       |
| Congenital Anomalies of the Eye                          | No         | 2727 (99.3)          | 546 (99.5)  | 4752 (99.3)       | 950 (99.3)  | 4361 (99.2)      | 873 (99.3)  | 2407 (99.3)       | 482 (99.4)  | 1507 (99.1)       | 301 (99)    | 1073 (99.8)       | 214 (99.5)  | 750 (100)         | 150 (100)   | 619 (99)          | 124 (99.2)  | 650 (100)         | 130 (100)   | 380 (100)         | 76 (100)    |
|                                                          | Yes        | 18 (0.7)             | ___         | 33 (0.7)          | ___         | 34 (0.8)         | ___         | 18 (0.7)          | ___         | 13 (0.9)          | ___         | ___               | ___         | 0 (0)             | 0 (0)       | ___               | ___         | 0 (0)             | 0 (0)       | 0 (0)             | 0 (0)       |
| Congenital Anomalies of the Genital Organs               | No         | 2663 (97)            | 534 (97.3)  | 4460 (93.2)       | 895 (93.5)  | 4176 (95)        | 835 (95)    | 2336 (96.3)       | 461 (95.1)  | 1476 (97.1)       | 293 (96.4)  | 1055 (98.1)       | 211 (98.1)  | 721 (96.1)        | 145 (96.7)  | 592 (94.7)        | 118 (94.4)  | 647 (99.5)        | 129 (99.2)  | 374 (98.4)        | 75 (98.7)   |
|                                                          | Yes        | 82 (3)               | 15 (2.7)    | 325 (6.8)         | 62 (6.5)    | 219 (5)          | 44 (5)      | 89 (3.7)          | 24 (5)      | 44 (2.9)          | 11 (3.6)    | 20 (1.9)          | ___         | 29 (3.9)          | ___         | 33 (5.3)          | ___         | ___               | ___         | ___               | ___         |
| Congenital Anomalies of the Digestive System             | No         | 2738 (99.7)          | 547 (99.6)  | 4745 (99.2)       | 951 (99.4)  | 4387 (99.8)      | 877 (99.8)  | 2412 (99.5)       | 482 (99.4)  | 1520 (100)        | 304 (100)   | 1075 (100)        | 215 (100)   | 750 (100)         | 150 (100)   | 618 (98.9)        | 124 (99.2)  | 650 (100)         | 130 (100)   | 380 (100)         | 76 (100)    |
|                                                          | Yes        | ___                  | ___         | 40 (0.8)          | ___         | ___              | ___         | 13 (0.5)          | ___         | 0 (0)             | 0 (0)       | 0 (0)             | 0 (0)       | 0 (0)             | 0 (0)       | ___               | ___         | 0 (0)             | 0 (0)       | 0 (0)             | 0 (0)       |
| Congenital Musculoskeletal Deformities                   | No         | 2742 (99.9)          | 545 (99.3)  | 4714 (98.5)       | 945 (98.8)  | 4337 (98.7)      | 864 (98.3)  | 2410 (99.6)       | 482 (99.4)  | 1514 (99.6)       | 303 (99.7)  | 1061 (98.7)       | 211 (98.1)  | 735 (98)          | 147 (98)    | 625 (100)         | 125 (100)   | 638 (98.2)        | 127 (97.7)  | 380 (100)         | 76 (100)    |
|                                                          | Yes        | ___                  | ___         | 71 (1.5)          | 12 (1.3)    | 58 (1.3)         | 15 (1.7)    | 15 (0.6)          | ___         | ___               | ___         | 14 (1.3)          | ___         | 15 (2)            | ___         | 0 (0)             | 0 (0)       | 12 (1.9)          | ___         | 0 (0)             | 0 (0)       |
| Other Congenital Anomalies                               | No         | 2745 (100)           | 549 (100)   | 4774 (99.8)       | 955 (99.8)  | 4395 (100)       | 879 (100)   | 2425 (100)        | 485 (100)   | 1520 (100)        | 304 (100)   | 1075 (100)        | 215 (100)   | 750 (100)         | 150 (100)   | 625 (100)         | 125 (100)   | 650 (100)         | 130 (100)   | 380 (100)         | 76 (100)    |
|                                                          | Yes        | 0 (0)                | 0 (0)       | 11 (0.2)          | ___         | 0 (0)            | 0 (0)       | 0 (0)             | 0 (0)       | 0 (0)             | 0 (0)       | 0 (0)             | 0 (0)       | 0 (0)             | 0 (0)       | 0 (0)             | 0 (0)       | 0 (0)             | 0 (0)       | 0 (0)             | 0 (0)       |
| Congenital Anomalies of the Respiratory System           | No         | 2745 (100)           | 549 (100)   | 4768 (99.6)       | 954 (99.7)  | 4388 (99.8)      | 878 (99.9)  | 2425 (100)        | 485 (100)   | 1520 (100)        | 304 (100)   | 1075 (100)        | 215 (100)   | 750 (100)         | 150 (100)   | 625 (100)         | 125 (100)   | 650 (100)         | 130 (100)   | 380 (100)         | 76 (100)    |
|                                                          | Yes        | 0 (0)                | 0 (0)       | 17 (0.4)          | ___         | ___              | ___         | 0 (0)             | 0 (0)       | 0 (0)             | 0 (0)       | 0 (0)             | 0 (0)       | 0 (0)             | 0 (0)       | 0 (0)             | 0 (0)       | 0 (0)             | 0 (0)       | 0 (0)             | 0 (0)       |
| Congenital Anomalies of the Skin                         | No         | 2721 (99.1)          | 542 (98.7)  |                   |             |                  |             |                   |             |                   |             |                   |             |                   |             |                   |             |                   |             |                   |             |

|                                                                |     |             |            |             |            |             |            |             |            |             |            |             |            |            |            |            |            |            |            |            |           |
|----------------------------------------------------------------|-----|-------------|------------|-------------|------------|-------------|------------|-------------|------------|-------------|------------|-------------|------------|------------|------------|------------|------------|------------|------------|------------|-----------|
| Intrauterine Placental Insufficiency                           | No  | 2708 (98.7) | 543 (98.9) | 4632 (96.8) | 927 (96.9) | 4335 (98.6) | 864 (98.3) | 2400 (99)   | 479 (98.8) | 1506 (99.1) | 302 (99.3) | 1055 (98.1) | 211 (98.1) | 735 (98)   | 147 (98)   | 612 (97.9) | 123 (98.4) | 642 (98.8) | 128 (98.5) | 367 (96.6) | 73 (96.1) |
|                                                                | Yes | 37 (1.4)    | ___        | 153 (3.2)   | 30 (3.1)   | 60 (1.4)    | 15 (1.7)   | 25 (1)      | ___        | 14 (0.9)    | ___        | 20 (1.9)    | ___        | 15 (2)     | ___        | 13 (2.1)   | ___        | ___        | ___        | ___        | 13 (3.4)  |
| Infectious Disease (Acute)                                     | No  | 2521 (91.8) | 499 (90.9) | 3499 (73.1) | 703 (73.5) | 2693 (61.3) | 529 (60.2) | 1295 (53.4) | 260 (53.6) | 606 (39.9)  | 130 (42.8) | 407 (37.9)  | 89 (41.4)  | 272 (36.3) | 53 (35.3)  | 223 (35.7) | 44 (35.2)  | 169 (26)   | 33 (25.4)  | 94 (24.7)  | 19 (25)   |
|                                                                | Yes | 224 (8.2)   | 50 (9.1)   | 1286 (26.9) | 254 (26.5) | 1702 (38.7) | 350 (39.8) | 1130 (46.6) | 225 (46.4) | 914 (60.1)  | 174 (57.2) | 668 (62.1)  | 126 (58.6) | 478 (63.7) | 97 (64.7)  | 402 (64.3) | 81 (64.8)  | 481 (74)   | 97 (74.6)  | 286 (75.3) | 57 (75)   |
| Neoplasm (Acute)                                               | No  | 2731 (99.5) | 546 (99.5) | 4751 (99.3) | 949 (99.2) | 4359 (99.2) | 870 (99)   | 2400 (99)   | 480 (99)   | 1516 (99.7) | 302 (99.3) | 1075 (100)  | 214 (99.5) | 723 (96.4) | 144 (96)   | 625 (100)  | 125 (100)  | 625 (96.2) | 126 (96.9) | 373 (98.2) | 75 (98.7) |
|                                                                | Yes | 14 (0.5)    | ___        | 34 (0.7)    | ___        | 36 (0.8)    | ___        | 25 (1)      | ___        | ___         | ___        | 0 (0)       | ___        | 27 (3.6)   | ___        | 0 (0)      | 0 (0)      | 25 (3.9)   | ___        | ___        | ___       |
| Endocrine, metabolic, and immunity disorders (Acute)           | No  | 2707 (98.6) | 539 (98.2) | 4607 (96.3) | 923 (96.5) | 4203 (95.6) | 843 (95.9) | 2330 (96.1) | 462 (95.3) | 1430 (94.1) | 286 (94.1) | 1023 (95.2) | 202 (94)   | 676 (90.1) | 134 (89.3) | 570 (91.2) | 112 (89.6) | 593 (91.2) | 117 (90)   | 355 (93.4) | 70 (92.1) |
|                                                                | Yes | 38 (1.4)    | ___        | 178 (3.7)   | 34 (3.6)   | 192 (4.4)   | 36 (4.1)   | 95 (3.9)    | 23 (4.7)   | 90 (5.9)    | 18 (5.9)   | 52 (4.8)    | 13 (6.1)   | 74 (9.9)   | 16 (10.7)  | 55 (8.8)   | 13 (10.4)  | 57 (8.8)   | 13 (10)    | 25 (6.6)   | ___       |
| Diseases of blood and blood-forming organs (Acute)             | No  | 2732 (99.5) | 546 (99.5) | 4659 (97.4) | 934 (97.6) | 4219 (96)   | 843 (95.9) | 2269 (93.6) | 449 (92.5) | 1392 (91.6) | 275 (90.5) | 977 (90.9)  | 185 (86.1) | 664 (88.5) | 132 (88)   | 556 (89)   | 110 (88)   | 558 (85.9) | 110 (84.6) | 297 (78.2) | 60 (79)   |
|                                                                | Yes | 13 (0.5)    | ___        | 126 (2.6)   | 23 (2.4)   | 176 (4)     | 36 (4.1)   | 156 (6.4)   | 36 (7.4)   | 128 (8.4)   | 29 (9.5)   | 98 (9.1)    | 30 (14)    | 86 (11.5)  | 18 (12)    | 69 (11)    | 15 (12)    | 92 (14.2)  | 20 (15.4)  | 83 (21.8)  | 16 (21.1) |
| Diseases of the nervous system and sense organs (Acute)        | No  | 2566 (93.5) | 519 (94.5) | 3457 (72.3) | 698 (72.9) | 2457 (55.9) | 493 (56.1) | 1125 (46.4) | 233 (48)   | 571 (37.6)  | 109 (35.9) | 376 (35)    | 78 (36.3)  | 287 (38.3) | 61 (40.7)  | 220 (35.2) | 45 (36)    | 198 (30.5) | 42 (32.3)  | 80 (21.1)  | 16 (21.1) |
|                                                                | Yes | 179 (6.5)   | 30 (5.5)   | 1328 (27.8) | 259 (27.1) | 1938 (44.1) | 386 (43.9) | 1300 (53.6) | 252 (52)   | 949 (62.4)  | 195 (64.1) | 699 (65)    | 137 (63.7) | 463 (61.7) | 89 (59.3)  | 405 (64.8) | 80 (64)    | 452 (69.5) | 88 (67.7)  | 300 (79)   | 60 (79)   |
| Diseases of the circulatory system (Acute)                     | No  | 2736 (99.7) | 546 (99.5) | 4750 (99.3) | 949 (99.2) | 4379 (99.6) | 877 (99.8) | 2414 (99.6) | 482 (99.4) | 1504 (99)   | 300 (98.7) | 1059 (99.5) | 212 (98.6) | 746 (99.5) | 149 (99.3) | 620 (99.2) | 124 (99.2) | 649 (99.9) | 129 (99.2) | 380 (100)  | 76 (100)  |
|                                                                | Yes | 147 (5.4)   | 36 (6.6)   | 635 (13.3)  | 141 (14.7) | 563 (12.8)  | 127 (14.5) | 447 (18.4)  | 94 (19.4)  | 16 (1.1)    | ___        | 16 (1.5)    | ___        | ___        | ___        | ___        | ___        | ___        | ___        | 0 (0)      | 0 (0)     |
| Diseases of the respiratory system (Acute)                     | No  | 2231 (81.3) | 442 (80.5) | 2368 (49.5) | 463 (48.4) | 1567 (35.7) | 319 (36.3) | 591 (24.4)  | 126 (26)   | 341 (22.4)  | 72 (23.7)  | 179 (16.7)  | 37 (17.2)  | 145 (19.3) | 29 (19.3)  | 133 (21.3) | 24 (19.2)  | 58 (8.9)   | 13 (10)    | 43 (11.3)  | 9 (11.8)  |
|                                                                | Yes | 514 (18.7)  | 107 (19.5) | 2417 (50.5) | 494 (51.6) | 2828 (64.4) | 560 (63.7) | 1834 (75.6) | 359 (74)   | 1179 (77.6) | 232 (76.3) | 896 (83.4)  | 178 (82.8) | 605 (80.7) | 121 (80.7) | 492 (78.7) | 101 (80.8) | 592 (91.1) | 117 (90)   | 337 (88.7) | 67 (88.2) |
| Diseases of the digestive system (Acute)                       | No  | 2523 (91.9) | 506 (92.2) | 3899 (81.5) | 772 (80.7) | 3183 (72.4) | 637 (72.5) | 1601 (66)   | 314 (64.7) | 887 (58.4)  | 183 (60.2) | 625 (58.1)  | 127 (59.1) | 418 (55.7) | 80 (53.3)  | 364 (58.2) | 69 (55.2)  | 277 (42.6) | 55 (42.3)  | 162 (42.6) | 30 (39.5) |
|                                                                | Yes | 222 (8.1)   | 43 (7.8)   | 886 (18.5)  | 185 (19.3) | 1212 (27.6) | 242 (27.5) | 824 (34)    | 171 (35.3) | 633 (41.6)  | 121 (39.8) | 450 (41.9)  | 88 (40.9)  | 332 (44.3) | 70 (46.7)  | 261 (41.8) | 56 (44.8)  | 373 (57.4) | 75 (57.7)  | 218 (57.4) | 46 (60.5) |
| Diseases of the genitourinary system (Acute)                   | No  | 2598 (94.6) | 513 (93.4) | 4150 (86.7) | 816 (85.3) | 3832 (87.2) | 752 (85.6) | 1978 (81.6) | 391 (80.6) | 1281 (84.3) | 253 (83.2) | 857 (79.7)  | 170 (79.1) | 597 (79.6) | 119 (79.3) | 456 (73)   | 93 (74.4)  | 504 (77.5) | 100 (76.9) | 300 (79)   | 60 (79)   |
|                                                                | Yes | 147 (5.4)   | 36 (6.6)   | 635 (13.3)  | 141 (14.7) | 563 (12.8)  | 127 (14.5) | 447 (18.4)  | 94 (19.4)  | 239 (15.7)  | 51 (16.8)  | 118 (20.3)  | 45 (20.9)  | 153 (20.4) | 31 (20.7)  | 169 (27)   | 32 (25.6)  | 146 (22.5) | 30 (23.1)  | 80 (21.1)  | 16 (21.1) |
| Diseases of the skin and subcutaneous tissue (Acute)           | No  | 2459 (89.6) | 493 (89.8) | 3848 (80.4) | 768 (80.3) | 3259 (74.2) | 654 (74.4) | 1687 (69.6) | 337 (69.5) | 998 (65.7)  | 198 (65.1) | 722 (67.2)  | 143 (66.5) | 474 (63.2) | 89 (59.3)  | 435 (69.6) | 78 (62.4)  | 346 (53.2) | 67 (51.5)  | 169 (44.5) | 36 (47.4) |
|                                                                | Yes | 286 (10.4)  | 56 (10.2)  | 937 (19.6)  | 189 (19.8) | 1136 (25.9) | 225 (25.6) | 738 (30.4)  | 148 (30.5) | 522 (34.3)  | 106 (34.9) | 353 (32.8)  | 72 (33.5)  | 276 (36.8) | 61 (40.7)  | 190 (30.4) | 47 (37.6)  | 304 (46.8) | 63 (48.5)  | 211 (55.5) | 40 (52.6) |
| Diseases of the musculoskeletal system (Acute)                 | No  | 2731 (99.5) | 546 (99.5) | 4607 (96.3) | 920 (96.1) | 4279 (97.4) | 851 (96.8) | 2254 (93)   | 449 (92.6) | 1393 (91.6) | 275 (90.5) | 985 (91.6)  | 193 (89.8) | 698 (93.1) | 141 (94)   | 579 (92.6) | 116 (92.8) | 517 (79.5) | 102 (78.5) | 347 (91.3) | 67 (88.2) |
|                                                                | Yes | 14 (0.5)    | ___        | 178 (3.7)   | 37 (3.9)   | 116 (2.6)   | 28 (3.2)   | 171 (7.1)   | 36 (7.4)   | 127 (8.4)   | 29 (9.5)   | 90 (8.4)    | 22 (10.2)  | 52 (6.9)   | ___        | 46 (7.4)   | ___        | 133 (20.5) | 28 (21.5)  | 33 (8.7)   | ___       |
| Congenital anomalies                                           | No  | 2433 (88.6) | 482 (87.8) | 3687 (77.1) | 741 (77.4) | 3393 (77.2) | 675 (76.8) | 1987 (81.9) | 386 (79.6) | 1260 (82.9) | 248 (81.6) | 890 (82.8)  | 175 (81.4) | 596 (79.5) | 119 (79.3) | 494 (79)   | 101 (80.8) | 513 (78.9) | 101 (77.7) | 339 (88.2) | 66 (86.8) |
|                                                                | Yes | 312 (11.4)  | 67 (12.2)  | 1098 (23)   | 216 (22.6) | 1002 (22.8) | 204 (23.2) | 438 (18.1)  | 99 (20.4)  | 260 (17.1)  | 56 (18.4)  | 185 (17.2)  | 40 (18.6)  | 154 (20.5) | 31 (20.7)  | 131 (21)   | 24 (19.2)  | 137 (21.1) | 29 (22.3)  | 41 (10.8)  | ___       |
| Certain conditions originating in the perinatal period (Acute) | No  | 1375 (50.1) | 269 (49)   | 1819 (38)   | 366 (38.2) | 1774 (40.4) | 358 (40.7) | 1008 (41.6) | 204 (42.1) | 726 (47.8)  | 138 (45.4) | 499 (46.4)  | 100 (46.5) | 341 (45.5) | 76 (50.7)  | 307 (49.1) | 61 (48.8)  | 270 (41.5) | 57 (43.9)  | 182 (47.9) | 38 (50)   |
|                                                                | Yes | 1370 (49.9) | 280 (51)   | 2966 (62)   | 591 (61.8) | 2621 (59.6) | 521 (59.3) | 1417 (58.4) | 281 (57.9) | 794 (52.2)  | 166 (54.6) | 576 (53.6)  | 115 (53.5) | 409 (54.5) | 74 (49.3)  | 318 (50.9) | 64 (51.2)  | 380 (58.5) | 73 (56.2)  | 198 (52.1) | 38 (50)   |
| Injury and poisoning (Acute)                                   | No  | 2670 (97.3) | 536 (97.6) | 4365 (91.2) | 874 (91.3) | 3742 (85.1) | 738 (84)   | 1787 (73.7) | 372 (76.7) | 1022 (67.2) | 201 (66.1) | 636 (59.2)  | 128 (59.5) | 421 (56.1) | 85 (56.7)  | 293 (46.9) | 63 (50.4)  | 324 (49.9) | 65 (50)    | 196 (51.6) | 37 (48.7) |
|                                                                | Yes | 75 (2.7)    | 13 (2.4)   | 420 (8.8)   | 83 (8.7)   | 653 (14.9)  | 141 (16)   | 638 (26.3)  | 113 (23.3) | 498 (32.8)  | 103 (33.9) | 439 (40.8)  | 87 (40.5)  | 329 (43.9) | 65 (43.3)  | 332 (53.1) | 62 (49.6)  | 326 (50.2) | 65 (50)    | 184 (48.4) | 39 (51.3) |
| Infectious Disease (Chronic)                                   | No  | 2738 (99.7) | 548 (99.8) | 4779 (99.9) | 955 (99.8) | 4392 (99.9) | 878 (99.9) | 2422 (99.9) | 484 (99.8) | 1520 (100)  | 304 (100)  | 1075 (100)  | 215 (100)  | 750 (100)  | 150 (100)  | 625 (100)  | 125 (100)  | 650 (100)  | 130 (100)  | 371 (97.6) | 75 (98.7) |
|                                                                | Yes | ___         | ___        | ___         | ___        | ___         | ___        | ___         | ___        | 0 (0)       | 0 (0)      | 0 (0)       | 0 (0)      | 0 (0)      | 0 (0)      | 0 (0)      | 0 (0)      | 0 (0)      | 0 (0)      | ___        | ___       |
| Neoplasm (Chronic)                                             | No  | 2739 (99.8) | 548 (99.8) | 4773 (99.8) | 955 (99.8) | 4378 (99.6) | 876 (99.7) | 2417 (99.7) | 483 (99.6) | 1520 (100)  | 304 (100)  | 1070 (99.5) | 213 (99.1) | 745 (99.3) | 149 (99.3) | 625 (100)  | 125 (100)  | 647 (99.5) | 129 (99.2) | 373 (98.2) | 75 (98.7) |
|                                                                | Yes | ___         | ___        | 12 (0.3)    | ___        | 17 (0.4)    | ___        | ___         | ___        | 0 (0)       | 0 (0)      | ___         | ___        | ___        | ___        | 0 (0)      | 0 (0)      | ___        | ___        | ___        | ___       |
| Endocrine, metabolic, and immunity disorders (Chronic)         | No  | 2697 (98.3) | 540 (98.4) | 4644 (97.1) | 926 (96.8) | 4273 (97.2) | 849 (96.6) | 2366 (97.6) | 472 (97.3) | 1451 (95.5) | 289 (95.1) | 1030 (95.8) | 205 (95.4) | 699 (93.2) | 140 (93.3) | 610 (97.6) | 123 (98.4) | 629 (96.8) | 125 (96.2) | 365 (96.1) | 70 (92.1) |
|                                                                | Yes | 48 (1.8)    | ___        | 141 (3)     | 31 (3.2)   | 122 (2.8)   | 30 (3.4)   | 59 (2.4)    | 13 (2.7)   | 69 (4.5)    | 15 (4.9)   | 45 (4.2)    | ___        | 51 (6.8)   | ___        | 15 (2.4)   | ___        | 21 (3.2)   | ___        | 15 (4)     | ___       |
| Diseases of blood and blood-forming organs (Chronic)           | No  | 2719 (99.1) | 544 (99.1) | 4696 (98.1) | 937 (97.9) | 4275 (97.3) | 851 (96.8) | 2361 (97.4) | 468 (96.5) | 1484 (97.6) | 297 (97.7) | 1044 (97.1) | 208 (96.7) | 742 (98.9) | 148 (98.7) | 614 (98.2) | 123 (98.4) | 619 (95.2) | 120 (92.3) | 380 (100)  | 76 (100)  |
|                                                                | Yes | 26 (1)      | ___        | 89 (1.9)    | 20 (2.1)   | 120 (2.7)   | 28 (3.2)   | 64 (2.6)    | 17 (3.5)   | 36 (2.4)    | ___        | 31 (2.9)    | ___        | ___        | ___        | 11 (1.8)   | ___        | 31 (4.8)   | ___        | 0 (0)      | 0 (0)     |
| Diseases of the nervous system and sense organs (Chronic)      | No  | 2559 (93.2) | 510 (92.9) | 4446 (92.9) | 891 (93.1) | 4085 (93)   | 812 (92.4) | 2209 (91.1) | 444 (91.6) | 1373 (90.3) | 270 (88.8) | 983 (91.4)  | 192 (89.3) | 683 (91.1) | 138 (92)   | 535 (85.6) | 106 (84.8) | 552 (84.9) | 110 (84.6) | 311 (81.8) | 60 (79)   |
|                                                                | Yes | 186 (6.8)   | 39 (7.1)   | 339 (7.1)   | 66 (6.9)   | 310 (7.1)   | 67 (7.6)   | 216 (8.9)   | 41 (8.5)   | 147 (9.7)   | 34 (11.2)  | 92 (8.6)    | 23 (10.7)  | 67 (8.9)   | 12 (8)     | 90 (14.4)  | 19 (15.2)  | 98 (15.1)  | 20 (15.4)  | 69 (18.2)  | 16 (21.1) |
| Diseases of the circulatory system (Chronic)                   | No  | 2672 (97.3) | 531 (96.7) | 4662 (97.4) | 932 (97.4) | 4302 (97.9) | 856 (97.4) | 2327 (96.4) | 469 (96.7) | 1472 (96.8) | 294 (96.7) | 1023 (95.2) | 204 (94.9) | 710 (94.7) | 142 (94.7) | 606 (97)   | 121 (96.8) | 648 (99.7) | 129 (99.2) | 380 (100)  | 76 (100)  |
|                                                                | Yes | 73 (2.7)    | 18 (3.3)   | 123 (2.6)   | 25 (2.6)   | 93 (2.1)    | 23 (2.6)   | 98 (4)      | 16 (3.3)   | 48 (3.2)    | ___        | 52 (4.8)    | 11 (5.1)   | 40 (5.3)   | ___        | 19 (3)     | ___        | ___        | 0 (0)      | 0 (0)      | 0 (0)     |
| Diseases of the respiratory system (Chronic)                   | No  | 2730 (99.5) | 544 (99.1) | 4371 (91.4) | 877 (91.6) | 3682 (83.8) | 740 (84.2) | 1981 (81.7) | 395 (81.4) | 1128 (74.2) | 228 (75)   | 831 (77.3)  | 165 (76.7) | 436 (58.1) | 89 (59.3)  | 359 (57.4) | 71 (56.8)  | 380 (58.5) | 72 (55.4)  | 268 (70.5) | 50 (65.8) |
|                                                                | Yes | 15 (0.6)    | ___        | 414 (8.7)   | 80 (8.4)   | 713 (16.2)  | 139 (15.8) | 444 (18.3)  | 90 (18.6)  | 392 (25.8)  | 76 (25)    | 244 (22.7)  | 50 (23.3)  | 314 (41.9) | 61 (40.7)  | 266 (42.6) | 54 (43.2)  | 270 (41.5) | 58 (44.6)  | 112 (29.5) | 26 (34.2) |
| Diseases of the digestive system (Chronic)                     | No  | 2670 (97.3) | 532 (96.9) | 4412 (92.2) |            |             |            |             |            |             |            |             |            |            |            |            |            |            |            |            |           |

**Table 12: Characteristics of NY Tonsillectomy and/or Adenoidectomy Matched Cohorts by Age at Exposure**

|                                                          |            | >6 months - ≤1 yr |             | >1 yr - ≤1.5 yrs |             | >1.5 yrs - ≤2 yrs |             | >2 yrs - ≤2.5 yrs |             | >2.5 yrs - ≤3 yrs |             | >3 yrs - ≤3.5 yrs |             | >3.5 yrs - ≤4 yrs |             | >4 yrs - ≤4.5 yrs |             | >4.5 yrs - ≤5 yrs |             |
|----------------------------------------------------------|------------|-------------------|-------------|------------------|-------------|-------------------|-------------|-------------------|-------------|-------------------|-------------|-------------------|-------------|-------------------|-------------|-------------------|-------------|-------------------|-------------|
|                                                          |            | Exposure          |             | Exposure         |             | Exposure          |             | Exposure          |             | Exposure          |             | Exposure          |             | Exposure          |             | Exposure          |             | Exposure          |             |
|                                                          |            | No<br>n(%)        | Yes<br>n(%) | No<br>n(%)       | Yes<br>n(%) | No<br>n(%)        | Yes<br>n(%) | No<br>n(%)        | Yes<br>n(%) | No<br>n(%)        | Yes<br>n(%) | No<br>n(%)        | Yes<br>n(%) | No<br>n(%)        | Yes<br>n(%) | No<br>n(%)        | Yes<br>n(%) | No<br>n(%)        | Yes<br>n(%) |
| Sex                                                      | Female     | 156 (31.2)        | 34 (34)     | 687 (31.4)       | 142 (32.4)  | 1425 (40.7)       | 278 (39.7)  | 1828 (40.4)       | 375 (41.5)  | 1990 (42.2)       | 403 (42.7)  | 2200 (41.6)       | 450 (42.5)  | 2153 (45.2)       | 430 (45.2)  | 2038 (49.3)       | 395 (47.8)  | 1642 (48.2)       | 328 (48.2)  |
|                                                          | Male       | 344 (68.8)        | 66 (66)     | 1503 (68.6)      | 296 (67.6)  | 2075 (59.3)       | 422 (60.3)  | 2692 (59.6)       | 529 (58.5)  | 2725 (57.8)       | 540 (57.3)  | 3090 (58.4)       | 608 (57.5)  | 2607 (54.8)       | 522 (54.8)  | 2097 (50.7)       | 432 (52.2)  | 1763 (51.8)       | 353 (51.8)  |
| Race                                                     | White      | 186 (37.2)        | 37 (37)     | 920 (42)         | 184 (42)    | 1287 (36.8)       | 258 (36.9)  | 1738 (38.5)       | 343 (37.9)  | 2041 (43.3)       | 402 (42.6)  | 2305 (43.6)       | 444 (42)    | 2057 (43.2)       | 410 (43.1)  | 1996 (48.3)       | 388 (46.9)  | 1509 (44.3)       | 294 (43.2)  |
|                                                          | Black      | 158 (31.6)        | 36 (36)     | 669 (30.6)       | 131 (29.9)  | 1005 (28.7)       | 203 (29)    | 1036 (22.9)       | 203 (22.5)  | 1023 (21.7)       | 212 (22.5)  | 1039 (19.6)       | 214 (20.2)  | 893 (18.8)        | 182 (19.1)  | 805 (19.5)        | 164 (19.8)  | 721 (21.2)        | 149 (21.9)  |
|                                                          | Hispanic   | 41 (8.2)          | ___         | 312 (14.3)       | 56 (12.8)   | 707 (20.2)        | 132 (18.9)  | 957 (21.2)        | 197 (21.8)  | 983 (20.9)        | 191 (20.3)  | 1088 (20.6)       | 227 (21.5)  | 1085 (22.8)       | 215 (22.6)  | 753 (18.2)        | 153 (18.5)  | 691 (20.3)        | 141 (20.7)  |
|                                                          | Other      | 115 (23)          | 19 (19)     | 289 (13.2)       | 67 (15.3)   | 501 (14.3)        | 107 (15.3)  | 789 (17.5)        | 161 (17.8)  | 668 (14.2)        | 138 (14.6)  | 858 (16.2)        | 173 (16.4)  | 725 (15.2)        | 145 (15.2)  | 581 (14.1)        | 122 (14.8)  | 484 (14.2)        | 97 (14.2)   |
| Income Based on ZIP Code of Residence (quartile)         | Quartile 1 | 155 (31)          | 39 (39)     | 731 (33.4)       | 146 (33.3)  | 1152 (32.9)       | 230 (32.9)  | 1297 (28.7)       | 254 (28.1)  | 1315 (27.9)       | 270 (28.6)  | 1398 (26.4)       | 290 (27.4)  | 1336 (28.1)       | 256 (26.9)  | 1149 (27.8)       | 230 (27.8)  | 966 (28.4)        | 192 (28.2)  |
|                                                          | Quartile 2 | 105 (21)          | 20 (20)     | 618 (28.2)       | 112 (25.6)  | 946 (27)          | 176 (25.1)  | 1327 (29.4)       | 262 (29)    | 1471 (31.2)       | 296 (31.4)  | 1356 (25.6)       | 267 (25.2)  | 1341 (28.2)       | 280 (29.4)  | 1247 (30.2)       | 239 (28.9)  | 953 (28)          | 195 (28.6)  |
|                                                          | Quartile 3 | 141 (28.2)        | 24 (24)     | 503 (23)         | 112 (25.6)  | 842 (24.1)        | 181 (25.9)  | 1069 (23.7)       | 216 (23.9)  | 1148 (24.4)       | 215 (22.8)  | 1218 (23)         | 238 (22.5)  | 1181 (24.8)       | 231 (24.3)  | 980 (23.7)        | 199 (24.1)  | 860 (25.3)        | 167 (24.5)  |
|                                                          | Quartile 4 | 99 (19.8)         | 17 (17)     | 338 (15.4)       | 68 (15.5)   | 560 (16)          | 113 (16.1)  | 827 (18.3)        | 172 (19)    | 781 (16.6)        | 162 (17.2)  | 1318 (24.9)       | 263 (24.9)  | 902 (19)          | 185 (19.2)  | 759 (18.4)        | 159 (19.2)  | 626 (18.4)        | 127 (18.7)  |
| Number of Outpatient Visits (quartile)                   | Quartile 1 | 25 (5)            | ___         | 121 (5.5)        | 27 (6.2)    | 216 (6.2)         | 49 (7)      | 423 (9.4)         | 93 (10.3)   | 550 (10.4)        | 82 (8.7)    | 550 (10.4)        | 108 (10.2)  | 379 (8)           | 81 (8.5)    | 288 (7)           | 61 (7.4)    | 305 (9)           | 64 (9.4)    |
|                                                          | Quartile 2 | 91 (18.2)         | 17 (17)     | 244 (11.1)       | 48 (11)     | 443 (12.7)        | 93 (13.3)   | 718 (15.9)        | 140 (15.5)  | 541 (11.5)        | 116 (12.3)  | 683 (12.9)        | 154 (14.6)  | 806 (16.9)        | 155 (16.3)  | 632 (15.3)        | 126 (15.2)  | 686 (20.2)        | 128 (18.8)  |
|                                                          | Quartile 3 | 62 (12.4)         | 14 (14)     | 391 (17.9)       | 85 (19.4)   | 854 (24.4)        | 164 (23.4)  | 1112 (24.6)       | 212 (23.5)  | 1143 (24.2)       | 233 (24.7)  | 1308 (24.7)       | 272 (25.7)  | 1206 (25.3)       | 250 (26.3)  | 1241 (30)         | 245 (29.6)  | 930 (27.3)        | 185 (27.2)  |
|                                                          | Quartile 4 | 322 (64.4)        | 64 (64)     | 1434 (65.5)      | 278 (63.5)  | 1987 (56.8)       | 394 (56.3)  | 2267 (50.2)       | 459 (50.8)  | 2614 (55.4)       | 512 (54.3)  | 2749 (52)         | 524 (49.5)  | 2369 (49.8)       | 466 (49)    | 1974 (47.7)       | 395 (47.8)  | 1484 (43.6)       | 304 (44.6)  |
| Total Number of Inpatient Stays (n)                      | 0          | 0 (0)             | 0 (0)       | 0 (0)            | 0 (0)       | 0 (0)             | 0 (0)       | 0 (0)             | 0 (0)       | 0 (0)             | 0 (0)       | 0 (0)             | 0 (0)       | 0 (0)             | 0 (0)       | 0 (0)             | 0 (0)       | 0 (0)             | 0 (0)       |
|                                                          | 1          | 363 (72.6)        | 71 (71)     | 1617 (73.8)      | 324 (74)    | 2528 (72.2)       | 492 (70.3)  | 3317 (73.4)       | 657 (72.7)  | 3321 (70.4)       | 653 (69.3)  | 3865 (73.1)       | 754 (71.3)  | 3579 (75.2)       | 700 (73.5)  | 3008 (72.7)       | 594 (71.8)  | 2347 (68.9)       | 462 (67.8)  |
|                                                          | 2          | 91 (18.2)         | 19 (19)     | 393 (18)         | 79 (18)     | 659 (18.8)        | 138 (19.7)  | 891 (19.7)        | 180 (19.9)  | 1052 (22.3)       | 208 (22.1)  | 1010 (19.1)       | 208 (19.7)  | 759 (16)          | 164 (17.2)  | 756 (18.3)        | 160 (19.4)  | 676 (19.9)        | 144 (21.2)  |
|                                                          | 3 or more  | 46 (9.2)          | ___         | 180 (8.2)        | 35 (8)      | 313 (8.9)         | 70 (10)     | 312 (6.9)         | 67 (7.4)    | 342 (7.3)         | 82 (8.7)    | 415 (7.8)         | 96 (9.1)    | 422 (8.9)         | 88 (9.2)    | 371 (9)           | 73 (8.8)    | 382 (11.2)        | 75 (11)     |
| <36 Weeks Gestational Age                                | No         | 468 (93.6)        | 94 (94)     | 2083 (95.1)      | 413 (94.3)  | 3247 (92.8)       | 647 (92.4)  | 4262 (94.3)       | 852 (94.3)  | 4581 (97.2)       | 909 (96.4)  | 5049 (95.4)       | 1006 (95.1) | 4486 (94.2)       | 897 (94.2)  | 3980 (96.3)       | 793 (95.9)  | 3287 (96.5)       | 655 (96.2)  |
|                                                          | Yes        | 32 (6.4)          | ___         | 107 (4.9)        | 25 (5.7)    | 253 (7.2)         | 53 (7.6)    | 258 (5.7)         | 52 (5.8)    | 134 (2.8)         | 34 (3.6)    | 241 (4.6)         | 52 (4.9)    | 274 (5.8)         | 55 (5.8)    | 155 (3.8)         | 34 (4.1)    | 118 (3.5)         | 26 (3.8)    |
| Low Birth Weight (<2500g and ≥1500g)                     | No         | 475 (95)          | 96 (96)     | 2096 (95.7)      | 416 (95)    | 3322 (94.9)       | 660 (94.3)  | 4309 (95.3)       | 857 (94.8)  | 4530 (96.1)       | 901 (95.6)  | 5072 (95.9)       | 1015 (95.9) | 4498 (94.5)       | 901 (94.6)  | 3960 (95.8)       | 791 (95.7)  | 3229 (94.8)       | 644 (94.6)  |
|                                                          | Yes        | 25 (5)            | ___         | 94 (4.3)         | 22 (5)      | 178 (5.1)         | 40 (5.7)    | 211 (4.7)         | 47 (5.2)    | 185 (3.9)         | 42 (4.5)    | 218 (4.1)         | 43 (4.1)    | 262 (5.5)         | 51 (5.4)    | 175 (4.2)         | 36 (4.4)    | 176 (5.2)         | 37 (5.4)    |
| Very Low Birth Weight (<1500g and ≥1000g)                | No         | 497 (99.4)        | 99 (99)     | 2176 (99.4)      | 435 (99.3)  | 3447 (98.5)       | 690 (98.6)  | 4480 (99.1)       | 896 (99.4)  | 4696 (99.6)       | 939 (99.6)  | 5226 (98.8)       | 1046 (98.9) | 4716 (99.1)       | 943 (99.1)  | 4081 (98.7)       | 816 (98.7)  | 3385 (99.4)       | 677 (99.4)  |
|                                                          | Yes        | ___               | ___         | 14 (0.6)         | ___         | 53 (1.5)          | ___         | 40 (0.9)          | ___         | 19 (0.4)          | ___         | 64 (1.2)          | 12 (1.1)    | 44 (0.9)          | ___         | 54 (1.3)          | 11 (1.3)    | 20 (0.6)          | ___         |
| Extremely Low Birth Weight (<1000g)                      | No         | 500 (100)         | 100 (100)   | 2188 (99.9)      | 437 (99.8)  | 3465 (99)         | 692 (98.9)  | 4496 (99.5)       | 898 (99.3)  | 4710 (99.9)       | 941 (99.8)  | 5271 (99.6)       | 1054 (99.6) | 4731 (99.4)       | 946 (99.4)  | 4114 (99.5)       | 823 (99.5)  | 3381 (99.3)       | 677 (99.4)  |
|                                                          | Yes        | 0 (0)             | 0 (0)       | ___              | ___         | 35 (1)            | ___         | 24 (0.5)          | ___         | ___               | ___         | 19 (0.4)          | ___         | 29 (0.6)          | ___         | 21 (0.5)          | ___         | 24 (0.7)          | ___         |
| Chromosomal Anomalies                                    | No         | 500 (100)         | 100 (100)   | 2190 (100)       | 438 (100)   | 3483 (99.5)       | 697 (99.6)  | 4507 (99.7)       | 901 (99.7)  | 4704 (99.8)       | 940 (99.7)  | 5262 (99.5)       | 1052 (99.4) | 4747 (99.7)       | 949 (99.7)  | 4135 (100)        | 827 (100)   | 3399 (99.8)       | 680 (99.9)  |
|                                                          | Yes        | 0 (0)             | 0 (0)       | 0 (0)            | 0 (0)       | 17 (0.5)          | ___         | 13 (0.3)          | ___         | 11 (0.2)          | ___         | 28 (0.5)          | ___         | 13 (0.3)          | ___         | 0 (0)             | 0 (0)       | ___               | ___         |
| Congenital Anomalies of the Heart and Circulatory System | No         | 473 (94.6)        | 96 (96)     | 2122 (96.9)      | 422 (96.4)  | 3400 (97.1)       | 678 (96.9)  | 4410 (97.6)       | 881 (97.5)  | 4616 (97.9)       | 923 (97.9)  | 5142 (97.2)       | 1025 (96.9) | 4626 (97.2)       | 925 (97.2)  | 4082 (98.7)       | 814 (98.4)  | 3320 (97.5)       | 660 (96.9)  |
|                                                          | Yes        | 27 (5.4)          | ___         | 68 (3.1)         | 16 (3.7)    | 100 (2.9)         | 22 (3.1)    | 110 (2.4)         | 23 (2.5)    | 99 (2.1)          | 20 (2.1)    | 148 (2.8)         | 33 (3.1)    | 134 (2.8)         | 27 (2.8)    | 53 (1.3)          | 13 (1.6)    | 85 (2.5)          | 21 (3.1)    |
| Congenital Anomalies of the Central Nervous System       | No         | 488 (97.6)        | 99 (99)     | 2190 (100)       | 438 (100)   | 3500 (100)        | 700 (100)   | 4506 (99.7)       | 902 (99.8)  | 4715 (100)        | 943 (100)   | 5282 (99.9)       | 1056 (99.8) | 4760 (100)        | 952 (100)   | 4125 (99.8)       | 824 (99.6)  | 3398 (99.8)       | 679 (99.7)  |
|                                                          | Yes        | 12 (2.4)          | ___         | 0 (0)            | 0 (0)       | 0 (0)             | 0 (0)       | 14 (0.3)          | ___         | 0 (0)             | 0 (0)       | ___               | ___         | 0 (0)             | 0 (0)       | 10 (0.2)          | ___         | ___               | ___         |
| Congenital Anomalies of the Eye                          | No         | 489 (97.8)        | 98 (98)     | 2173 (99.2)      | 435 (99.3)  | 3466 (99)         | 694 (99.1)  | 4499 (99.5)       | 899 (99.5)  | 4692 (99.5)       | 937 (99.4)  | 5269 (99.6)       | 1052 (99.4) | 4748 (99.8)       | 948 (99.6)  | 4104 (99.3)       | 822 (99.4)  | 3396 (99.7)       | 678 (99.6)  |
|                                                          | Yes        | 11 (2.2)          | ___         | 17 (0.8)         | ___         | 34 (1)            | ___         | 21 (0.5)          | ___         | 23 (0.5)          | ___         | 21 (0.4)          | ___         | 12 (0.3)          | ___         | 31 (0.8)          | ___         | ___               | ___         |
| Congenital Anomalies of the Genital Organs               | No         | 495 (99)          | 99 (99)     | 2171 (99.1)      | 434 (99.1)  | 3477 (99.3)       | 695 (99.3)  | 4468 (98.9)       | 893 (98.8)  | 4688 (99.4)       | 938 (99.5)  | 5269 (99.6)       | 1053 (99.5) | 4735 (99.5)       | 947 (99.5)  | 4105 (99.3)       | 821 (99.3)  | 3381 (99.3)       | 676 (99.3)  |
|                                                          | Yes        | ___               | ___         | 19 (0.9)         | ___         | 23 (0.7)          | ___         | 52 (1.2)          | 11 (1.2)    | 27 (0.6)          | ___         | 21 (0.4)          | ___         | 25 (0.5)          | ___         | 30 (0.7)          | ___         | 24 (0.7)          | ___         |
| Congenital Anomalies of the Digestive System             | No         | 496 (99.2)        | 99 (99)     | 2180 (99.5)      | 436 (99.5)  | 3469 (99.1)       | 692 (98.9)  | 4502 (99.6)       | 900 (99.6)  | 4698 (99.6)       | 940 (99.7)  | 5263 (99.5)       | 1054 (99.6) | 4736 (99.5)       | 949 (99.7)  | 4128 (99.8)       | 825 (99.8)  | 3404 (100)        | 680 (99.9)  |
|                                                          | Yes        | ___               | ___         | ___              | ___         | 31 (0.9)          | ___         | 18 (0.4)          | ___         | 17 (0.4)          | ___         | 27 (0.5)          | ___         | 24 (0.5)          | ___         | ___               | ___         | ___               | ___         |
| Congenital Musculoskeletal Deformities                   | No         | 500 (100)         | 100 (100)   | 2151 (98.2)      | 429 (98)    | 3432 (98.1)       | 685 (97.9)  | 4477 (99.1)       | 894 (98.9)  | 4657 (98.8)       | 935 (99.2)  | 5248 (99.2)       | 1050 (99.2) | 4694 (98.6)       | 939 (98.6)  | 4053 (98)         | 810 (97.9)  | 3356 (98.6)       | 669 (98.2)  |
|                                                          | Yes        | 0 (0)             | 0 (0)       | 39 (1.8)         | ___         | 68 (1.9)          | 15 (2.1)    | 43 (1)            | ___         | 58 (1.2)          | ___         | 42 (0.8)          | ___         | 66 (1.4)          | 13 (1.4)    | 82 (2)            | 17 (2.1)    | 49 (1.4)          | 12 (1.8)    |
| Other Congenital Anomalies                               | No         | 500 (100)         | 100 (100)   | 2183 (99.7)      | 436 (99.5)  | 3492 (99.8)       | 699 (99.9)  | 4516 (99.9)       | 903 (99.9)  | 4715 (100)        | 943 (100)   | 5274 (99.7)       | 1054 (99.6) | 4751 (99.8)       | 951 (99.9)  | 4130 (99.9)       | 826 (99.9)  | 3400 (99.9)       | 680 (99.9)  |
|                                                          | Yes        | 0 (0)             | 0 (0)       | ___              | ___         | ___               | ___         | ___               | ___         | 0 (0)             | 0 (0)       | 16 (0.3)          | ___         | ___               | ___         | ___               | ___         | ___               | ___         |
| Congenital Anomalies of the Respiratory System           | No         | 500 (100)         | 100 (100)   | 2186 (99.8)      | 437 (99.8)  | 3498 (99.9)       | 699 (99.9)  | 4509 (99.8)       | 902 (99.8)  | 4704 (99.8)       | 941 (99.8)  | 5272 (99.7)       | 1054 (99.6) | 4754 (99.9)       | 951 (99.9)  | 4127 (99.8)       | 826 (99.9)  | 3399 (99.8)       | 679 (99.7)  |
|                                                          | Yes        | 0 (0)             | 0 (0)       | ___              | ___         | ___               | ___         | 11 (0.2)          | ___         | 11 (0.2)          | ___         | 18 (0.3)          | ___         | ___               | ___         | ___               | ___         | ___               | ___         |
| Congenital Anomalies of the Skin                         | No         | 488 (97.6)        | 98 (98)     | 2126 (97.1)      | 427 (97.5)  | 3406 (97.3)       | 683 (97.6)  | 4379 (96.9)       | 876 (96.9)  | 4657 (98.8)       | 926 (98.2)  | 5185 (98)         | 1037 (98)   | 4705 (98.8)       | 939 (98.6)  | 4058 (98.1)       | 810 (97.9)  | 3364 (98.8)       | 672 (98.7)  |
|                                                          | Yes        | 12 (2.4)          | ___         | 64 (2.9)         | 11 (2.5)    | 94 (2.7)          | 17 (2.4)    | 141 (3.1)         | 28 (3.1)    | 58 (1.2)          | 17 (1.8)    | 105 (2)           | 21 (2)      | 55 (1.2)          | 13 (1.4)    | 77 (1.9)          | 17 (2.1)    | 41 (1.2)          | ___         |
| Congenital Anomalies of the Urinary System               | No         | 494 (98.8)        | 99 (99)     | 2184 (99.7)      | 436 (99.5)  | 3466 (99)         | 693 (99)    | 4497 (99.5)       | 901 (99.7)  | 4701 (99.7)       | 941 (99.8)  | 5277 (99.8)       | 1057 (99.9) | 4746 (99.7)       | 949 (99.7)  | 4116 (99.5)       | 821 (99.3)  | 3389 (99.5)       | 679 (99.7)  |
|                                                          | Yes        | ___               | ___         | ___              | ___         | 34 (1)            | ___         | 23 (0.5)          |             |                   |             |                   |             |                   |             |                   |             |                   |             |

|                                                                |     |                  |                  |             |                  |                  |                  |                  |                  |                  |                  |             |                  |                  |                  |             |                  |             |                  |
|----------------------------------------------------------------|-----|------------------|------------------|-------------|------------------|------------------|------------------|------------------|------------------|------------------|------------------|-------------|------------------|------------------|------------------|-------------|------------------|-------------|------------------|
| Intrauterine Placental Insufficiency                           | No  | 490 (98)         | 99 (99)          | 2134 (97.4) | 427 (97.5)       | 3443 (98.4)      | 688 (98.3)       | 4462 (98.7)      | 891 (98.6)       | 4640 (98.4)      | 928 (98.4)       | 5220 (98.7) | 1042 (98.5)      | 4724 (99.2)      | 944 (99.2)       | 4099 (99.1) | 819 (99)         | 3370 (99)   | 674 (99)         |
|                                                                | Yes | ___ <sup>o</sup> | ___ <sup>o</sup> | 56 (2.6)    | 11 (2.5)         | 57 (1.6)         | 12 (1.7)         | 58 (1.3)         | 13 (1.4)         | 75 (1.6)         | 15 (1.6)         | 70 (1.3)    | 16 (1.5)         | 36 (0.8)         | ___ <sup>o</sup> | 36 (0.9)    | ___ <sup>o</sup> | 35 (1)      | 7 (1)            |
| Infectious Disease (Acute)                                     | No  | 291 (58.2)       | 58 (58)          | 1080 (49.3) | 217 (49.5)       | 1264 (36.1)      | 256 (36.6)       | 1629 (36)        | 332 (36.7)       | 1525 (32.3)      | 306 (32.5)       | 1356 (25.6) | 276 (26.1)       | 1076 (22.6)      | 230 (24.2)       | 848 (20.5)  | 182 (22)         | 625 (18.4)  | 132 (19.4)       |
|                                                                | Yes | 209 (41.8)       | 42 (42)          | 1110 (50.7) | 221 (50.5)       | 2236 (63.9)      | 444 (63.4)       | 2891 (64)        | 572 (63.3)       | 3190 (67.7)      | 637 (67.6)       | 3934 (74.4) | 782 (73.9)       | 3684 (77.4)      | 722 (75.8)       | 3287 (79.5) | 645 (78)         | 2780 (81.6) | 549 (80.6)       |
| Neoplasm (Acute)                                               | No  | 482 (96.4)       | 97 (97)          | 2155 (98.4) | 432 (98.6)       | 3474 (99.3)      | 693 (99)         | 4467 (98.8)      | 887 (98.1)       | 4674 (99.1)      | 932 (98.8)       | 5208 (98.5) | 1043 (98.6)      | 4649 (97.7)      | 929 (97.6)       | 4039 (97.7) | 808 (97.7)       | 3332 (97.9) | 667 (97.9)       |
|                                                                | Yes | 18 (3.6)         | ___ <sup>o</sup> | 35 (1.6)    | ___ <sup>o</sup> | 26 (0.7)         | ___ <sup>o</sup> | 53 (1.2)         | 17 (1.9)         | 41 (0.9)         | 11 (1.2)         | 82 (1.6)    | 15 (1.4)         | 111 (2.3)        | 23 (2.4)         | 96 (2.3)    | 19 (2.3)         | 73 (2.1)    | 14 (2.1)         |
| Endocrine, metabolic, and immunity disorders (Acute)           | No  | 472 (94.4)       | 92 (92)          | 2050 (93.6) | 407 (92.9)       | 3168 (90.5)      | 634 (90.6)       | 4080 (90.3)      | 810 (89.6)       | 4269 (90.5)      | 849 (90)         | 4765 (90.1) | 943 (89.1)       | 4428 (93)        | 879 (92.3)       | 3758 (90.9) | 749 (90.6)       | 3049 (89.5) | 605 (88.8)       |
|                                                                | Yes | 28 (5.6)         | ___ <sup>o</sup> | 140 (6.4)   | 31 (7.1)         | 332 (9.5)        | 66 (9.4)         | 440 (9.7)        | 94 (10.4)        | 446 (9.5)        | 94 (10)          | 525 (9.9)   | 115 (10.9)       | 332 (7)          | 73 (7.7)         | 377 (9.1)   | 78 (9.4)         | 356 (10.5)  | 76 (11.2)        |
| Diseases of blood and blood-forming organs (Acute)             | No  | 475 (95)         | 96 (96)          | 2074 (94.8) | 415 (94.8)       | 3281 (93.7)      | 655 (93.6)       | 4078 (90.2)      | 813 (89.9)       | 4107 (87.1)      | 812 (86.1)       | 4502 (85.1) | 895 (84.6)       | 4074 (85.6)      | 806 (84.7)       | 3328 (80.5) | 666 (80.5)       | 2858 (83.9) | 563 (82.7)       |
|                                                                | Yes | 25 (5)           | ___ <sup>o</sup> | 116 (5.3)   | 23 (5.3)         | 219 (6.3)        | 45 (6.4)         | 442 (9.8)        | 91 (10.1)        | 608 (12.9)       | 131 (13.9)       | 788 (14.9)  | 163 (15.4)       | 686 (14.4)       | 146 (15.3)       | 807 (19.5)  | 161 (19.5)       | 547 (16.1)  | 118 (17.3)       |
| Diseases of the nervous system and sense organs (Acute)        | No  | 197 (39.4)       | 40 (40)          | 576 (26.3)  | 109 (24.9)       | 742 (21.2)       | 151 (21.6)       | 980 (21.7)       | 201 (22.2)       | 809 (17.2)       | 181 (19.2)       | 890 (16.8)  | 185 (17.5)       | 765 (16.1)       | 157 (16.5)       | 549 (13.3)  | 114 (13.8)       | 476 (14)    | 96 (14.1)        |
|                                                                | Yes | 303 (60.6)       | 60 (60)          | 1614 (73.7) | 329 (75.1)       | 2758 (78.8)      | 549 (78.4)       | 3540 (78.3)      | 703 (77.8)       | 3906 (82.8)      | 762 (80.8)       | 4400 (83.2) | 873 (82.5)       | 3995 (83.9)      | 795 (83.5)       | 3586 (86.7) | 713 (86.2)       | 2929 (86)   | 585 (85.9)       |
| Diseases of the circulatory system (Acute)                     | No  | 495 (99)         | 99 (99)          | 2176 (99.4) | 435 (99.3)       | 3477 (99.3)      | 696 (99.4)       | 4488 (99.3)      | 897 (99.2)       | 4662 (98.9)      | 931 (98.7)       | 5241 (99.1) | 1048 (99.1)      | 4744 (99.7)      | 947 (99.5)       | 4072 (98.5) | 815 (98.6)       | 3341 (98.1) | 668 (98.1)       |
|                                                                | Yes | ___ <sup>o</sup> | ___ <sup>o</sup> | 14 (0.6)    | ___ <sup>o</sup> | 23 (0.7)         | ___ <sup>o</sup> | 32 (0.7)         | ___ <sup>o</sup> | 53 (1.1)         | 12 (1.3)         | 49 (0.9)    | ___ <sup>o</sup> | 16 (0.3)         | ___ <sup>o</sup> | 63 (1.5)    | 12 (1.5)         | 64 (1.9)    | 13 (1.9)         |
| Diseases of the respiratory system (Acute)                     | No  | 79 (15.8)        | 19 (19)          | 232 (10.6)  | 47 (10.7)        | 450 (12.9)       | 103 (14.7)       | 455 (10.1)       | 106 (11.7)       | 387 (8.2)        | 81 (8.6)         | 453 (8.6)   | 95 (9)           | 238 (5)          | 56 (5.9)         | 219 (5.3)   | 44 (5.3)         | 183 (5.4)   | 39 (5.7)         |
|                                                                | Yes | 421 (84.2)       | 81 (81)          | 1958 (89.4) | 391 (89.3)       | 3050 (87.1)      | 597 (85.3)       | 4065 (89.9)      | 798 (88.3)       | 4328 (91.8)      | 862 (91.4)       | 4837 (91.4) | 963 (91)         | 4522 (95)        | 896 (94.1)       | 3916 (94.7) | 783 (94.7)       | 3222 (94.6) | 642 (94.3)       |
| Diseases of the digestive system (Acute)                       | No  | 346 (69.2)       | 67 (67)          | 1441 (65.8) | 288 (65.8)       | 2081 (59.5)      | 411 (58.7)       | 2488 (55)        | 508 (56.2)       | 2507 (53.2)      | 500 (53)         | 2482 (46.9) | 506 (47.8)       | 2240 (47.1)      | 452 (47.5)       | 1992 (48.2) | 391 (47.3)       | 1447 (42.5) | 302 (44.4)       |
|                                                                | Yes | 154 (30.8)       | 33 (33)          | 749 (34.2)  | 150 (34.3)       | 1419 (40.5)      | 289 (41.3)       | 2032 (45)        | 396 (43.8)       | 2208 (46.8)      | 443 (47)         | 2808 (53.1) | 552 (52.2)       | 2520 (52.9)      | 500 (52.5)       | 2143 (51.8) | 436 (52.7)       | 1958 (57.5) | 379 (55.7)       |
| Diseases of the genitourinary system (Acute)                   | No  | 472 (94.4)       | 96 (96)          | 2000 (91.3) | 396 (90.4)       | 3215 (91.9)      | 637 (91)         | 4055 (89.7)      | 806 (89.2)       | 4208 (89.3)      | 839 (89)         | 4557 (86.1) | 902 (85.3)       | 4056 (85.2)      | 807 (84.8)       | 3333 (80.6) | 664 (80.3)       | 2689 (79)   | 538 (79)         |
|                                                                | Yes | 28 (5.6)         | ___ <sup>o</sup> | 190 (8.7)   | 42 (9.6)         | 285 (8.1)        | 63 (9)           | 465 (10.3)       | 98 (10.8)        | 507 (10.8)       | 104 (11)         | 733 (13.9)  | 156 (14.7)       | 704 (14.8)       | 145 (15.2)       | 802 (19.4)  | 163 (19.7)       | 716 (21)    | 143 (21)         |
| Diseases of the skin and subcutaneous tissue (Acute)           | No  | 353 (70.6)       | 74 (74)          | 1488 (68)   | 293 (66.9)       | 2187 (62.5)      | 436 (62.3)       | 2879 (63.7)      | 566 (62.6)       | 2650 (56.2)      | 538 (57.1)       | 2730 (51.6) | 554 (52.4)       | 2529 (53.1)      | 506 (53.2)       | 1961 (47.4) | 386 (46.7)       | 1586 (46.6) | 320 (47)         |
|                                                                | Yes | 147 (29.4)       | 26 (26)          | 702 (32.1)  | 145 (33.1)       | 1313 (37.5)      | 264 (37.7)       | 1641 (36.3)      | 338 (37.4)       | 2065 (43.8)      | 405 (43)         | 2560 (48.4) | 504 (47.6)       | 2231 (46.9)      | 446 (46.9)       | 2174 (52.6) | 441 (53.3)       | 1819 (53.4) | 361 (53)         |
| Diseases of the musculoskeletal system (Acute)                 | No  | 483 (96.6)       | 96 (96)          | 2081 (95)   | 415 (94.8)       | 3212 (91.8)      | 641 (91.6)       | 4130 (91.4)      | 811 (89.7)       | 4293 (91.1)      | 851 (90.2)       | 4520 (85.4) | 901 (85.2)       | 4043 (84.9)      | 804 (84.5)       | 3436 (83.1) | 676 (81.7)       | 2771 (81.4) | 553 (81.2)       |
|                                                                | Yes | 17 (3.4)         | ___ <sup>o</sup> | 109 (5)     | 23 (5.3)         | 288 (8.2)        | 59 (8.4)         | 390 (8.6)        | 93 (10.3)        | 422 (9)          | 92 (9.8)         | 770 (14.6)  | 157 (14.8)       | 717 (15.1)       | 148 (15.6)       | 699 (16.9)  | 151 (18.3)       | 634 (18.6)  | 128 (18.8)       |
| Congenital anomalies                                           | No  | 412 (82.4)       | 83 (83)          | 1770 (80.8) | 347 (79.2)       | 2828 (80.8)      | 565 (80.7)       | 3655 (80.9)      | 719 (79.5)       | 3920 (83.1)      | 773 (82)         | 4344 (82.1) | 864 (81.7)       | 3901 (82)        | 767 (80.6)       | 3407 (82.4) | 675 (81.6)       | 2813 (82.6) | 555 (81.5)       |
|                                                                | Yes | 88 (17.6)        | 17 (17)          | 420 (19.2)  | 91 (20.8)        | 672 (19.2)       | 135 (19.3)       | 865 (19.1)       | 185 (20.5)       | 795 (16.9)       | 170 (18)         | 946 (17.9)  | 194 (18.3)       | 859 (18.1)       | 185 (19.4)       | 728 (17.6)  | 152 (18.4)       | 592 (17.4)  | 126 (18.5)       |
| Certain conditions originating in the perinatal period (Acute) | No  | 252 (50.4)       | 53 (53)          | 1135 (51.8) | 218 (49.8)       | 1833 (52.4)      | 352 (50.3)       | 2216 (49)        | 434 (48)         | 2315 (49.1)      | 458 (48.6)       | 2642 (49.9) | 529 (50)         | 2464 (51.8)      | 497 (52.2)       | 2170 (52.5) | 423 (51.2)       | 1784 (52.4) | 357 (52.4)       |
|                                                                | Yes | 248 (49.6)       | 47 (47)          | 1055 (48.2) | 220 (50.2)       | 1667 (47.6)      | 348 (49.7)       | 2304 (51)        | 470 (52)         | 2400 (50.9)      | 485 (51.4)       | 2648 (50.1) | 529 (50)         | 2296 (48.2)      | 455 (47.8)       | 1965 (47.5) | 404 (48.9)       | 1621 (47.6) | 324 (47.6)       |
| Injury and poisoning (Acute)                                   | No  | 445 (89)         | 88 (88)          | 1632 (74.5) | 327 (74.7)       | 2426 (69.3)      | 486 (69.4)       | 2745 (60.7)      | 540 (59.7)       | 2681 (56.9)      | 538 (57.1)       | 2454 (46.4) | 501 (47.4)       | 2391 (50.2)      | 478 (50.2)       | 1824 (44.1) | 365 (44.1)       | 1358 (39.9) | 279 (41)         |
|                                                                | Yes | 55 (11)          | 12 (12)          | 558 (25.5)  | 111 (25.3)       | 1074 (30.7)      | 214 (30.6)       | 1775 (39.3)      | 364 (40.3)       | 2034 (43.1)      | 405 (43)         | 2836 (53.6) | 557 (52.7)       | 2369 (49.8)      | 474 (49.8)       | 2311 (55.9) | 462 (55.9)       | 2047 (60.1) | 402 (55.9)       |
| Infectious Disease (Chronic)                                   | No  | 500 (100)        | 100 (100)        | 2190 (100)  | 438 (100)        | 3492 (99.8)      | 697 (99.6)       | 4518 (100)       | 903 (99.9)       | 4712 (99.9)      | 942 (99.9)       | 5278 (99.8) | 1054 (99.6)      | 4756 (99.9)      | 951 (99.9)       | 4120 (99.6) | 824 (99.6)       | 3405 (100)  | 681 (100)        |
|                                                                | Yes | 0 (0)            | 0 (0)            | 0 (0)       | 0 (0)            | ___ <sup>o</sup> | 12 (0.2)    | ___ <sup>o</sup> | ___ <sup>o</sup> | ___ <sup>o</sup> | 15 (0.4)    | ___ <sup>o</sup> | 0 (0)       | 0 (0)            |
| Neoplasm (Chronic)                                             | No  | 500 (100)        | 100 (100)        | 2176 (99.4) | 435 (99.3)       | 3496 (99.9)      | 698 (99.7)       | 4506 (99.7)      | 901 (99.7)       | 4690 (99.5)      | 937 (99.4)       | 5270 (99.6) | 1054 (99.6)      | 4730 (99.4)      | 945 (99.3)       | 4063 (98.3) | 813 (98.3)       | 3364 (98.8) | 673 (98.8)       |
|                                                                | Yes | 0 (0)            | 0 (0)            | 14 (0.6)    | ___ <sup>o</sup> | ___ <sup>o</sup> | ___ <sup>o</sup> | 14 (0.3)         | ___ <sup>o</sup> | 25 (0.5)         | ___ <sup>o</sup> | 20 (0.4)    | ___ <sup>o</sup> | 30 (0.6)         | ___ <sup>o</sup> | 72 (1.7)    | 14 (1.7)         | 41 (1.2)    | ___ <sup>o</sup> |
| Endocrine, metabolic, and immunity disorders (Chronic)         | No  | 491 (98.2)       | 98 (98)          | 2148 (98.1) | 427 (97.5)       | 3343 (95.5)      | 670 (95.7)       | 4355 (96.4)      | 866 (95.8)       | 4499 (95.4)      | 894 (94.8)       | 5003 (94.6) | 1004 (94.9)      | 4483 (94.2)      | 897 (94.2)       | 3922 (94.9) | 781 (94.4)       | 3155 (92.7) | 631 (92.7)       |
|                                                                | Yes | ___ <sup>o</sup> | ___ <sup>o</sup> | 42 (1.9)    | 11 (2.5)         | 157 (4.5)        | 30 (4.3)         | 165 (3.7)        | 38 (4.2)         | 216 (4.6)        | 49 (5.2)         | 287 (5.4)   | 54 (5.1)         | 277 (5.8)        | 55 (5.8)         | 213 (5.2)   | 46 (5.6)         | 250 (7.3)   | 50 (7.3)         |
| Diseases of blood and blood-forming organs (Chronic)           | No  | 496 (99.2)       | 99 (99)          | 2139 (97.7) | 429 (98)         | 3390 (96.9)      | 675 (96.4)       | 4399 (97.3)      | 879 (97.2)       | 4586 (97.3)      | 913 (96.8)       | 5141 (97.2) | 1027 (97.1)      | 4594 (96.5)      | 915 (96.1)       | 4036 (97.6) | 802 (97)         | 3304 (97)   | 660 (96.9)       |
|                                                                | Yes | ___ <sup>o</sup> | ___ <sup>o</sup> | 51 (2.3)    | ___ <sup>o</sup> | 110 (3.1)        | 25 (3.6)         | 121 (2.7)        | 25 (2.8)         | 129 (2.7)        | 30 (3.2)         | 149 (2.8)   | 31 (2.9)         | 166 (3.5)        | 37 (3.9)         | 99 (2.4)    | 25 (3)           | 101 (3)     | 21 (3.1)         |
| Diseases of the nervous system and sense organs (Chronic)      | No  | 320 (64)         | 66 (66)          | 1351 (61.7) | 274 (62.6)       | 2120 (60.6)      | 424 (60.6)       | 3056 (67.6)      | 600 (66.4)       | 3191 (67.7)      | 626 (66.4)       | 3622 (68.5) | 719 (68)         | 3149 (66.2)      | 615 (64.6)       | 2718 (65.7) | 536 (64.8)       | 2202 (64.7) | 442 (64.9)       |
|                                                                | Yes | 180 (36)         | 34 (34)          | 839 (38.3)  | 164 (37.4)       | 1380 (39.4)      | 276 (39.4)       | 1464 (32.4)      | 304 (33.6)       | 1524 (32.3)      | 317 (33.6)       | 1668 (31.5) | 339 (32)         | 1611 (33.8)      | 337 (35.4)       | 1417 (34.3) | 291 (35.2)       | 1203 (35.3) | 239 (35.1)       |
| Diseases of the circulatory system (Chronic)                   | No  | 494 (98.8)       | 99 (99)          | 2114 (96.5) | 423 (96.6)       | 3375 (96.4)      | 673 (96.1)       | 4403 (97.4)      | 878 (97.1)       | 4623 (98.1)      | 920 (97.6)       | 5105 (96.5) | 1020 (96.4)      | 4596 (96.6)      | 920 (96.6)       | 3986 (96.4) | 795 (96.1)       | 3251 (95.5) | 649 (95.3)       |
|                                                                | Yes | ___ <sup>o</sup> | ___ <sup>o</sup> | 76 (3.5)    | 15 (3.4)         | 125 (3.6)        | 27 (3.9)         | 117 (2.6)        | 26 (2.9)         | 92 (2)           | 23 (2.4)         | 185 (3.5)   | 38 (3.6)         | 164 (3.5)        | 32 (3.4)         | 149 (3.6)   | 32 (3.9)         | 154 (4.5)   | 32 (4.7)         |
| Diseases of the respiratory system (Chronic)                   | No  | 281 (56.2)       | 57 (57)          | 1191 (54.4) | 236 (53.9)       | 1817 (51.9)      | 362 (51.7)       | 2208 (48.9)      | 455 (50.3)       | 2262 (48)        | 454 (48.1)       | 2497 (47.2) | 494 (46.7)       | 2020 (42.4)      | 408 (42.9)       | 1776 (43)   | 358 (43.3)       | 1376 (40.4) | 272 (39.9)       |
|                                                                | Yes | 219 (43.8)       | 43 (43)          | 999 (45.6)  | 202 (46.1)       | 1683 (48.1)      | 338 (48.3)       | 2312 (51.2)      | 449 (49.7)       | 2453 (52)        | 489 (51.9)       | 2793 (52.8) | 564 (53.3)       | 2740 (57.6)      | 544 (57.1)       | 2359 (57.1) | 469 (56.7)       | 2029 (59.6) | 409 (60.1)       |
| Diseases of the digestive system (Chronic)                     | No  | 335 (67)         | 68 (68)          | 1800 (82.2) | 352 (80.4)       | 2885 (82.4)      | 572 (81.7)       | 4030 (89.2)      | 803 (88.8)       | 4201 (89.1)      | 833 (88.3)       | 4758 (89.9) | 941 (88.9)       | 4376 (91.9)      | 874 (91.8)       | 3822 (92.4) | 758 (91.7)       | 3086 (90.6) | 609 (89.4)       |
|                                                                | Yes | 165 (33)         | 32 (32)          | 390 (17.8)  | 86 (19.6)        | 615 (17.6)       | 128 (18.3)       | 490 (10.8)       | 101 (11.2)       | 514 (10.9)       | 110 (11.7)       | 532 (10.1)  | 117 (11.1)       | 384 (8.1)        | 78 (8.2)         | 313 (7.6)   | 69 (8.3)         | 319 (9.4)   | 72 (10.6)        |
| Diseases of the genitourinary system (Chronic)                 | No  | 500 (1           |                  |             |                  |                  |                  |                  |                  |                  |                  |             |                  |                  |                  |             |                  |             |                  |

**Table 13: Standardized Differences for Covariates in TX Pyloromyotomy Matched Cohorts by Age at Exposure**

|                                                                | >Birth -<br>≤28 days | >28 days -<br>≤6 months |
|----------------------------------------------------------------|----------------------|-------------------------|
| Sex                                                            | -0.0041              | -0.0255                 |
| Race                                                           | 0.0109               | 0.0326                  |
| Income Based on ZIP Code of Residence (quartile)               | 0.0092               | 0.0203                  |
| Number of Outpatient Visits (quartile)                         | 0.0129               | 0.0172                  |
| Total Number of Inpatient Stays (n)                            | 0.0268               | 0.0236                  |
| <36 Weeks Gestational Age                                      | -0.0067              | -0.0173                 |
| Low Birth Weight (<2500g and ≥1500g)                           | -0.0067              | -0.0049                 |
| Very Low Birth Weight (<1500g and ≥1000g)                      | 0.0225               | 0.0292                  |
| Extremely Low Birth Weight (<1000g)                            | 0                    | 0.0053                  |
| Chromosomal Anomalies                                          | 0.0141               | 0                       |
| Congenital Anomalies of the Heart and Circulatory System       | 0.0035               | 0                       |
| Congenital Anomalies of the Central Nervous System             | 0.0386               | 0.0254                  |
| Congenital Anomalies of the Eye                                | -0.002               | 0.0106                  |
| Congenital Anomalies of the Genital Organs                     | 0.0139               | -0.0305                 |
| Congenital Anomalies of the Digestive System                   | 0.0199               | 0.0023                  |
| Congenital Musculoskeletal Deformities                         | 0.0047               | 0.0046                  |
| Other Congenital Anomalies                                     | 0.0243               | 0                       |
| Congenital Anomalies of the Respiratory System                 | 0.0032               | 0.0226                  |
| Congenital Anomalies of the Skin                               | 0.0073               | -0.0018                 |
| Congenital Anomalies of the Urinary System                     | 0.0032               | -0.0184                 |
| Intrauterine Hypoxia                                           | 0.0017               | 0.0067                  |
| Intrauterine Exposure to Noxious Agent                         | -0.038               | 0.0112                  |
| Intrauterine Placental Insufficiency                           | 0.0285               | 0.0222                  |
| Infectious Disease (Acute)                                     | 0.0056               | 0.0049                  |
| Neoplasm (Acute)                                               | -0.0115              | -0.006                  |
| Endocrine, metabolic, and immunity disorders (Acute)           | -0.0043              | 0.0314                  |
| Diseases of blood and blood-forming organs (Acute)             | -0.0287              | 0.0305                  |
| Diseases of the nervous system and sense organs (Acute)        | 0.0023               | 0.0179                  |
| Diseases of the circulatory system (Acute)                     | 0.0037               | -0.0078                 |
| Diseases of the respiratory system (Acute)                     | 0.0119               | 0.0295                  |
| Diseases of the digestive system (Acute)                       | -0.01                | -0.0027                 |
| Diseases of the genitourinary system (Acute)                   | -0.0071              | 0.0074                  |
| Diseases of the skin and subcutaneous tissue (Acute)           | 0.0087               | 0.0196                  |
| Diseases of the musculoskeletal system (Acute)                 | 0.0139               | -0.0092                 |
| Congenital anomalies                                           | 0.0194               | -0.002                  |
| Certain conditions originating in the perinatal period (Acute) | 0.0067               | -0.0033                 |
| Injury and poisoning (Acute)                                   | 0.0062               | 0.0164                  |
| Infectious Disease (Chronic)                                   | 0                    | 0                       |
| Neoplasm (Chronic)                                             | 0                    | 0.0053                  |



|                                                                  |         |        |
|------------------------------------------------------------------|---------|--------|
| Endocrine, metabolic, and immunity disorders (Chronic)           | -0.0052 | 0.0155 |
| Diseases of blood and blood-forming organs (Chronic)             | 0.0057  | 0.0049 |
| Diseases of the nervous system and sense organs (Chronic)        | 0.0176  | 0.001  |
| Diseases of the circulatory system (Chronic)                     | 0.0163  | 0.0256 |
| Diseases of the respiratory system (Chronic)                     | 0.0138  | 0.0038 |
| Diseases of the digestive system (Chronic)                       | 0.0071  | 0.0012 |
| Diseases of the genitourinary system (Chronic)                   | -0.006  | 0.012  |
| Diseases of the skin and subcutaneous tissue (Chronic)           | 0.0225  | 0.0256 |
| Diseases of the musculoskeletal system (Chronic)                 | 0.0141  | 0      |
| Certain conditions originating in the perinatal period (Chronic) | -0.0333 | 0.0087 |
| Injury and poisoning (Chronic)                                   | 0       | 0      |



|                                                                  |   |        |         |         |         |         |         |         |         |         |         |
|------------------------------------------------------------------|---|--------|---------|---------|---------|---------|---------|---------|---------|---------|---------|
| Endocrine, metabolic, and immunity disorders (Chronic)           | 0 | 0.0323 | 0.044   | 0.0493  | 0.0715  | 0.0554  | 0.1019  | 0.0601  | 0       | 0.0298  | 0.0583  |
| Diseases of blood and blood-forming organs (Chronic)             | 0 | 0.025  | -0.0078 | 0.037   | 0.0344  | -0.1013 | 0.0567  | -0.0775 | 0       | -0.103  | 0       |
| Diseases of the nervous system and sense organs (Chronic)        | 0 | 0.0307 | 0.0175  | 0.015   | -0.0263 | -0.0179 | 0.0681  | 0.0682  | -0.0312 | 0.0299  | 0.0148  |
| Diseases of the circulatory system (Chronic)                     | 0 | 0.022  | 0.055   | 0.0125  | -0.006  | 0.0098  | 0.0567  | 0.0122  | 0.0643  | 0.0344  | -0.0821 |
| Diseases of the respiratory system (Chronic)                     | 0 | 0.0362 | 0.0048  | -0.0155 | 0.018   | -0.0625 | -0.077  | -0.0764 | 0.1137  | -0.0706 | -0.0862 |
| Diseases of the digestive system (Chronic)                       | 0 | 0.0245 | 0.0372  | 0.0208  | 0.0063  | -0.0447 | 0.1567  | 0.0504  | 0.0226  | 0.0835  | -0.0937 |
| Diseases of the genitourinary system (Chronic)                   | 0 | 0.0055 | 0.0304  | -0.0226 | 0.0328  | 0.0407  | -0.0465 | 0.0326  | -0.0891 | 0.0692  | -0.0219 |
| Diseases of the skin and subcutaneous tissue (Chronic)           | 0 | 0.0176 | -0.0118 | -0.0102 | 0.0527  | 0.1248  | 0.0853  | 0.0682  | 0.1762  | 0.0169  | -0.0359 |
| Diseases of the musculoskeletal system (Chronic)                 | 0 | 0      | 0       | 0       | -0.0386 | 0       | 0.0567  | 0.0461  | -0.0732 | 0       | 0       |
| Certain conditions originating in the perinatal period (Chronic) | 0 | 0.0176 | -0.0337 | 0.012   | 0       | -0.038  | 0       | 0       | -0.0556 | -0.027  | 0       |
| Injury and poisoning (Chronic)                                   | 0 | 0      | 0       | 0       | 0       | 0       | 0       | -0.0453 | 0       | 0       | 0       |

**Table 15: Standardized Differences for Covariates in TX Circumcision Cohorts by Age at Exposure**

|                                                                | >28 days -<br>≤6 months | >6 months -<br>≤1 yr | >1 yr -<br>≤1.5 yrs | >1.5 yrs -<br>≤2 yrs | >2 yrs -<br>≤2.5 yrs | >2.5 yrs -<br>≤3 yrs | >3 yrs -<br>≤3.5 yrs | >3.5 yrs -<br>≤4 yrs | >4 yrs -<br>≤4.5 yrs | >4.5 yrs -<br>≤5 yrs |
|----------------------------------------------------------------|-------------------------|----------------------|---------------------|----------------------|----------------------|----------------------|----------------------|----------------------|----------------------|----------------------|
| Sex                                                            | 0                       | 0                    | 0                   | 0                    | 0                    | 0                    | 0                    | 0                    | 0                    | 0                    |
| Race                                                           | 0.023                   | 0.0329               | 0.0373              | 0.0368               | 0.0561               | 0.0564               | 0.017                | 0.0753               | 0.066                | 0.0887               |
| Income Based on ZIP Code of Residence (quartile)               | 0.0251                  | 0.0212               | 0.0388              | 0.0641               | 0.0561               | 0.0861               | 0.0215               | 0.0467               | 0.1308               | 0.1491               |
| Number of Outpatient Visits (quartile)                         | 0.0362                  | 0.0218               | 0.0393              | 0.042                | 0.0349               | 0.0551               | 0.0351               | 0.0879               | 0.0866               | 0.0452               |
| Total Number of Inpatient Stays (n)                            | 0.0274                  | 0.0307               | 0.0493              | 0.0379               | 0.0638               | 0.0518               | 0.0307               | 0.0259               | 0.0497               | 0.0815               |
| <36 Weeks Gestational Age                                      | 0.0193                  | 0.0267               | 0.0276              | 0.0511               | 0.0431               | 0.0489               | -0.0028              | 0.005                | -0.0353              | -0.0199              |
| Low Birth Weight (<2500g and ≥1500g)                           | 0.0092                  | 0.0157               | 0.0205              | 0.0363               | 0.0359               | 0.0335               | 0.0205               | 0.0698               | -0.0296              | -0.0838              |
| Very Low Birth Weight (<1500g and ≥1000g)                      | 0.0046                  | 0.0195               | -0.0083             | 0.0452               | 0.0277               | -0.0048              | 0                    | -0.0653              | 0.0617               | 0                    |
| Extremely Low Birth Weight (<1000g)                            | 0.0195                  | -0.0113              | 0.0232              | 0.0192               | 0.0054               | 0.0551               | -0.0118              | -0.0362              | 0.0568               | 0                    |
| Chromosomal Anomalies                                          | 0.0125                  | 0.0116               | 0                   | 0.0086               | 0                    | 0                    | 0                    | 0                    | 0                    | 0                    |
| Congenital Anomalies of the Heart and Circulatory System       | 0.0148                  | 0.0419               | 0.0056              | 0.0448               | 0.0298               | -0.0256              | 0.0352               | 0.0494               | 0.0518               | 0.0301               |
| Congenital Anomalies of the Central Nervous System             | 0.0157                  | 0.013                | 0.0025              | -0.008               | 0.0476               | 0                    | 0.0507               | 0                    | 0                    | 0                    |
| Congenital Anomalies of the Eye                                | 0.0096                  | 0.0019               | 0.0063              | 0.0121               | 0.0206               | 0.0243               | 0.0185               | 0                    | 0                    | 0                    |
| Congenital Anomalies of the Genital Organs                     | -0.0006                 | 0.0013               | 0.0271              | 0.014                | -0.0297              | 0.0426               | 0.0149               | 0.0081               | -0.029               | 0.0449               |
| Congenital Anomalies of the Digestive System                   | 0.0028                  | -0.0047              | -0.0027             | 0.0041               | 0                    | 0.025                | -0.0086              | 0                    | 0.0568               | 0                    |
| Congenital Musculoskeletal Deformities                         | 0.0174                  | 0.0019               | -0.0087             | 0.0068               | 0.0498               | 0.0291               | 0.0185               | 0.0435               | 0.0115               | 0                    |
| Other Congenital Anomalies                                     | 0.0122                  | 0.018                | -0.0157             | 0                    | 0                    | -0.0104              | 0.0131               | 0                    | 0                    | 0                    |
| Congenital Anomalies of the Respiratory System                 | 0.0095                  | 0.007                | 0                   | 0.0059               | 0.0212               | -0.0075              | 0                    | 0                    | 0                    | 0                    |
| Congenital Anomalies of the Skin                               | -0.0044                 | 0.0206               | 0.0114              | 0.0595               | 0.0369               | 0.025                | 0                    | -0.0251              | 0                    | 0.072                |
| Congenital Anomalies of the Urinary System                     | 0.0105                  | -0.0024              | 0                   | 0.0097               | -0.0183              | 0.023                | 0.0185               | 0                    | 0                    | 0.0212               |
| Intrauterine Hypoxia                                           | -0.0029                 | -0.0147              | 0.0304              | 0.0069               | -0.0209              | 0.0773               | 0                    | 0.01                 | 0.0459               | 0.0212               |
| Intrauterine Exposure to Noxious Agent                         | 0.0092                  | 0.0325               | 0.0245              | 0.0349               | -0.0031              | -0.0048              | 0.0194               | 0.0562               | 0                    | 0                    |
| Intrauterine Placental Insufficiency                           | 0.0099                  | -0.0074              | -0.0042             | -0.0127              | -0.0033              | 0.02                 | -0.0168              | 0.0435               | 0.0568               | 0.037                |
| Infectious Disease (Acute)                                     | 0.0265                  | 0.0074               | 0.0019              | -0.0154              | 0.0514               | 0.0062               | -0.0504              | 0.0108               | -0.033               | -0.0516              |
| Neoplasm (Acute)                                               | 0.0228                  | -0.0024              | -0.0211             | 0.0213               | 0.0063               | 0.007                | 0.0194               | 0.0317               | -0.0923              | 0.0212               |
| Endocrine, metabolic, and immunity disorders (Acute)           | 0.0358                  | 0.0032               | 0.0446              | 0.0267               | 0.042                | 0.0035               | 0.0572               | 0.0526               | -0.0104              | 0.0618               |
| Diseases of blood and blood-forming organs (Acute)             | 0.0161                  | 0.0115               | 0.0149              | -0.0021              | 0.0546               | 0.014                | 0.0583               | -0.0026              | -0.026               | -0.0402              |
| Diseases of the nervous system and sense organs (Acute)        | 0.023                   | -0.0159              | -0.01               | -0.0298              | -0.003               | -0.0155              | -0.0403              | -0.015               | 0                    | -0.1008              |
| Diseases of the circulatory system (Acute)                     | 0.0384                  | 0.0025               | 0.0262              | -0.0066              | 0.0277               | 0.0496               | 0.0056               | 0.0165               | 0                    | 0                    |
| Diseases of the respiratory system (Acute)                     | 0.0475                  | -0.0046              | -0.012              | 0.0163               | 0.0131               | -0.0432              | -0.0352              | 0.0044               | 0.016                | -0.0798              |
| Diseases of the digestive system (Acute)                       | 0.0299                  | -0.0217              | 0.0041              | -0.0232              | -0.0305              | -0.0386              | 0.008                | 0.0058               | -0.0105              | -0.0291              |
| Diseases of the genitourinary system (Acute)                   | 0.0566                  | 0.0034               | 0.0322              | -0.0238              | -0.0449              | 0.0203               | -0.0672              | -0.0166              | -0.0053              | 0.0783               |
| Diseases of the skin and subcutaneous tissue (Acute)           | 0.0204                  | -0.026               | -0.0101             | 0.0298               | -0.0282              | -0.0168              | -0.0157              | 0.0118               | -0.0583              | 0.0041               |
| Diseases of the musculoskeletal system (Acute)                 | 0.0008                  | 0.0124               | 0.0016              | 0.0231               | 0.0412               | 0.0191               | 0.0274               | -0.0382              | -0.041               | 0.022                |
| Congenital anomalies                                           | 0.0307                  | 0.0284               | 0.009               | 0.0429               | 0.0336               | 0.0501               | 0.0452               | 0.0162               | 0.0618               | 0.0326               |
| Certain conditions originating in the perinatal period (Acute) | 0.005                   | 0.016                | 0.024               | 0.0158               | -0.0121              | 0.0315               | -0.0264              | 0.0377               | 0.1279               | -0.0862              |
| Injury and poisoning (Acute)                                   | 0.0065                  | 0.0021               | -0.015              | -0.0357              | -0.0026              | -0.0047              | -0.0046              | -0.0703              | 0.047                | -0.0128              |
| Infectious Disease (Chronic)                                   | 0.0057                  | 0.0112               | 0.0091              | 0                    | 0.033                | 0                    | 0                    | 0                    | 0                    | 0                    |
| Neoplasm (Chronic)                                             | -0.007                  | -0.0068              | 0.0136              | 0.0182               | 0.0206               | 0                    | 0                    | 0                    | 0.0568               | 0.0301               |

|                                                                  |         |        |         |        |         |         |         |         |         |         |
|------------------------------------------------------------------|---------|--------|---------|--------|---------|---------|---------|---------|---------|---------|
| Endocrine, metabolic, and immunity disorders (Chronic)           | 0.0066  | 0.0225 | -0.0008 | 0.0135 | 0.0353  | 0.0581  | -0.004  | 0.0424  | 0.0264  | -0.0078 |
| Diseases of blood and blood-forming organs (Chronic)             | 0.0157  | 0.0404 | 0.0359  | 0.0165 | 0.0257  | 0.0149  | 0.0556  | -0.0113 | -0.0042 | -0.0091 |
| Diseases of the nervous system and sense organs (Chronic)        | 0.0278  | 0.0137 | -0.0049 | 0.0443 | 0.0307  | 0.0057  | -0.0286 | 0.0201  | -0.0276 | 0.0194  |
| Diseases of the circulatory system (Chronic)                     | 0.0226  | 0.0153 | 0.0316  | 0.0209 | 0.0143  | -0.045  | 0.0538  | 0.0063  | 0.0517  | -0.0578 |
| Diseases of the respiratory system (Chronic)                     | 0.0239  | -0.016 | 0.0032  | 0.0168 | -0.0085 | -0.0059 | 0.0475  | 0       | -0.0445 | -0.0375 |
| Diseases of the digestive system (Chronic)                       | 0.0175  | 0      | 0.0322  | 0.0153 | 0.0199  | 0.0033  | 0.0043  | 0.0445  | 0.005   | -0.0118 |
| Diseases of the genitourinary system (Chronic)                   | 0.0096  | 0.0074 | -0.0074 | 0.0084 | 0.0303  | 0.0318  | 0.0161  | 0.0159  | 0.0222  | 0.0699  |
| Diseases of the skin and subcutaneous tissue (Chronic)           | 0.0075  | 0.0244 | 0.0036  | 0.0054 | 0.0221  | 0.0159  | 0.0215  | 0.0513  | -0.0165 | 0.088   |
| Diseases of the musculoskeletal system (Chronic)                 | -0.0037 | -0.008 | 0.0206  | 0.0439 | 0       | 0.027   | 0.0073  | -0.0154 | -0.0593 | 0       |
| Certain conditions originating in the perinatal period (Chronic) | 0.0209  | 0.0322 | 0.0272  | 0.018  | 0.0038  | -0.0054 | -0.0055 | 0.0534  | 0       | 0       |
| Injury and poisoning (Chronic)                                   | 0       | 0.0159 | 0       | 0      | -0.0038 | 0.0243  | -0.0168 | 0.0856  | 0       | 0.0212  |

**Table 16: Standardized Differences for Covariates in TX Tonsillectomy and/or Adenoidectomy Cohorts by Age at Exposure**

|                                                                | >6 months -<br>≤1 yr | >1 yr -<br>≤1.5 yrs | >1.5 yrs -<br>≤2 yrs | >2 yrs -<br>≤2.5 yrs | >2.5 yrs -<br>≤3 yrs | >3 yrs -<br>≤3.5 yrs | >3.5 yrs -<br>≤4 yrs | >4 yrs -<br>≤4.5 yrs | >4.5 yrs -<br>≤5 yrs |
|----------------------------------------------------------------|----------------------|---------------------|----------------------|----------------------|----------------------|----------------------|----------------------|----------------------|----------------------|
| Sex                                                            | 0.0412               | 0.0187              | 0.028                | -0.0251              | 0.0009               | 0.0105               | -0.0026              | 0.001                | -0.0285              |
| Race                                                           | 0.0689               | 0.0118              | 0.0184               | 0.0381               | 0.0273               | 0.021                | 0.0195               | 0.0244               | 0.0359               |
| Income Based on ZIP Code of Residence (quartile)               | 0.0561               | 0.0206              | 0.021                | 0.0343               | 0.0237               | 0.0417               | 0.0206               | 0.0284               | 0.0155               |
| Number of Outpatient Visits (quartile)                         | 0.0641               | 0.0243              | 0.0313               | 0.0096               | 0.0111               | 0.0332               | 0.0177               | 0.0292               | 0.0597               |
| Total Number of Inpatient Stays (n)                            | 0.0902               | 0.0203              | 0.0179               | 0.0016               | 0.0331               | 0.0238               | 0.0105               | 0.0252               | 0.0173               |
| <36 Weeks Gestational Age                                      | 0.0093               | 0.0207              | 0.0247               | 0.0149               | 0.0146               | 0.0296               | 0.0135               | 0.0052               | 0.0134               |
| Low Birth Weight (<2500g and ≥1500g)                           | -0.0392              | -0.0019             | 0.0116               | 0.0202               | 0.0028               | 0.0135               | 0.0048               | 0.0195               | 0.0334               |
| Very Low Birth Weight (<1500g and ≥1000g)                      | 0                    | 0.0082              | 0.0216               | 0.0121               | 0.0114               | 0.0094               | 0.0151               | -0.0101              | -0.009               |
| Extremely Low Birth Weight (<1000g)                            | 0                    | 0.0234              | 0.019                | 0.0082               | 0                    | 0.0184               | -0.0018              | 0.0079               | 0                    |
| Chromosomal Anomalies                                          | 0.0091               | 0.0207              | -0.009               | -0.017               | 0.0069               | -0.003               | 0.0097               | 0.0029               | 0.0339               |
| Congenital Anomalies of the Heart and Circulatory System       | -0.0299              | 0.0095              | 0.0007               | 0                    | 0.0288               | 0.0273               | 0.0324               | 0.0214               | 0.0147               |
| Congenital Anomalies of the Central Nervous System             | -0.0087              | 0.0082              | -0.0116              | -0.0147              | 0.0042               | 0                    | 0.0151               | 0.006                | 0.014                |
| Congenital Anomalies of the Eye                                | -0.0751              | 0                   | 0                    | -0.0068              | 0                    | -0.0023              | 0.04                 | 0.0089               | 0.0044               |
| Congenital Anomalies of the Genital Organs                     | 0.0313               | 0.0169              | 0.0045               | -0.0166              | 0                    | -0.0021              | 0.0068               | -0.0032              | 0                    |
| Congenital Anomalies of the Digestive System                   | -0.017               | 0.0038              | -0.0047              | -0.0018              | 0.0025               | -0.0023              | 0.0033               | 0.0126               | -0.0035              |
| Congenital Musculoskeletal Deformities                         | -0.04                | 0.0176              | -0.0054              | 0.0243               | 0.0195               | 0.0168               | 0.0149               | 0.0205               | 0.0231               |
| Other Congenital Anomalies                                     | 0                    | 0.0169              | 0                    | 0.0055               | -0.0038              | 0.0063               | -0.0112              | 0                    | 0.0136               |
| Congenital Anomalies of the Respiratory System                 | 0                    | 0.0078              | -0.0027              | 0.0235               | 0.0192               | 0.0188               | 0.0084               | 0.0263               | -0.0088              |
| Congenital Anomalies of the Skin                               | -0.0087              | -0.0253             | 0.0085               | 0.0262               | -0.0182              | 0.0213               | 0.0209               | 0.0033               | 0.0051               |
| Congenital Anomalies of the Urinary System                     | 0                    | -0.0266             | 0.0088               | 0.0271               | 0.0156               | -0.0083              | 0.0305               | 0.0104               | 0.0064               |
| Intrauterine Hypoxia                                           | -0.0141              | 0.0067              | 0                    | 0.0077               | 0.005                | 0.0097               | 0.007                | 0.0198               | 0.0313               |
| Intrauterine Exposure to Noxious Agent                         | -0.0062              | 0.0362              | 0.0185               | 0.0178               | 0.0207               | -0.0083              | 0.0365               | 0.0251               | -0.006               |
| Intrauterine Placental Insufficiency                           | 0.0197               | -0.0061             | 0.0122               | 0.0175               | 0.0148               | 0.0168               | 0.0042               | -0.0015              | 0.0281               |
| Infectious Disease (Acute)                                     | 0.0663               | 0.0073              | -0.0157              | -0.0085              | -0.0046              | -0.0137              | -0.041               | -0.0489              | -0.0347              |
| Neoplasm (Acute)                                               | -0.0209              | 0.0086              | 0.0356               | 0                    | 0.0255               | 0.0177               | 0.037                | 0.0133               | 0.0351               |
| Endocrine, metabolic, and immunity disorders (Acute)           | -0.008               | 0.0288              | 0.0205               | 0.0225               | 0.0296               | 0.0431               | -0.0142              | 0.0242               | 0.0107               |
| Diseases of blood and blood-forming organs (Acute)             | 0.0228               | -0.0293             | 0.0159               | -0.0018              | -0.0005              | -0.012               | 0.0221               | 0.0278               | -0.042               |
| Diseases of the nervous system and sense organs (Acute)        | 0.0125               | -0.0512             | -0.001               | -0.0113              | -0.0084              | 0.0118               | -0.0052              | -0.0036              | -0.0329              |
| Diseases of the circulatory system (Acute)                     | -0.0249              | 0                   | 0.0136               | 0.0271               | 0.0032               | 0.0165               | -0.0125              | 0.0014               | -0.0134              |
| Diseases of the respiratory system (Acute)                     | 0.0412               | 0.0008              | 0.0111               | -0.0165              | -0.0014              | -0.0142              | -0.0421              | -0.041               | -0.0643              |
| Diseases of the digestive system (Acute)                       | 0.0309               | 0.0212              | 0.0091               | 0.0118               | 0.0095               | -0.0028              | -0.0036              | -0.0106              | -0.0277              |
| Diseases of the genitourinary system (Acute)                   | 0.0018               | 0.046               | 0.008                | 0.0072               | 0.0176               | 0.0261               | 0.0004               | 0.0187               | -0.0193              |
| Diseases of the skin and subcutaneous tissue (Acute)           | 0.0187               | -0.0021             | -0.0103              | 0.0135               | 0.014                | -0.0345              | -0.0219              | 0.0007               | -0.0124              |
| Diseases of the musculoskeletal system (Acute)                 | 0.0426               | 0.0168              | 0.0143               | 0.0242               | 0.0219               | 0.016                | 0.025                | 0.023                | 0.0005               |
| Congenital anomalies                                           | -0.0108              | 0.0399              | 0.0251               | 0.0237               | 0.0341               | 0.0248               | 0.0482               | 0.0357               | 0.0322               |
| Certain conditions originating in the perinatal period (Acute) | -0.0159              | -0.0004             | 0                    | 0.0047               | 0.0417               | 0.0231               | 0.0121               | 0.0429               | 0.0144               |
| Injury and poisoning (Acute)                                   | -0.029               | 0.0086              | 0.0261               | -0.0083              | -0.0137              | -0.0094              | -0.0042              | 0.0103               | -0.0223              |
| Infectious Disease (Chronic)                                   | 0                    | 0.0069              | 0                    | 0.0121               | 0.004                | 0.0188               | 0.006                | 0.0127               | 0                    |
| Neoplasm (Chronic)                                             | -0.012               | 0.0069              | 0.0056               | 0                    | -0.0071              | 0.0027               | 0.0151               | 0                    | -0.0193              |

|                                                                  |         |         |         |         |         |         |         |         |         |
|------------------------------------------------------------------|---------|---------|---------|---------|---------|---------|---------|---------|---------|
| Endocrine, metabolic, and immunity disorders (Chronic)           | 0.0198  | 0.0103  | 0.0362  | 0.0253  | 0.0233  | 0.0288  | 0.0464  | 0.0205  | -0.0052 |
| Diseases of blood and blood-forming organs (Chronic)             | -0.0249 | 0.021   | 0.0444  | -0.0006 | 0.0309  | -0.0042 | -0.0085 | -0.0067 | 0.0083  |
| Diseases of the nervous system and sense organs (Chronic)        | -0.0459 | 0.0154  | -0.0015 | -0.0127 | 0.0092  | 0.0165  | 0.0014  | 0.0188  | 0.0364  |
| Diseases of the circulatory system (Chronic)                     | -0.021  | -0.0083 | 0.0134  | 0.0082  | 0.0007  | 0.0175  | 0.0145  | 0.0204  | 0.0242  |
| Diseases of the respiratory system (Chronic)                     | 0.0316  | 0.0107  | 0.0018  | -0.0029 | 0.0006  | -0.0193 | -0.0173 | -0.0156 | -0.0688 |
| Diseases of the digestive system (Chronic)                       | 0.0578  | 0.012   | 0.007   | 0.0177  | 0.0177  | 0.0065  | 0.0267  | 0.0331  | 0.0282  |
| Diseases of the genitourinary system (Chronic)                   | 0.0514  | 0.0219  | -0.0061 | 0.0207  | 0.0152  | -0.0015 | 0.0024  | 0.0285  | -0.01   |
| Diseases of the skin and subcutaneous tissue (Chronic)           | 0.0474  | 0.0164  | 0.0293  | 0.0045  | -0.0098 | 0.0153  | 0.0443  | 0.0037  | 0.0065  |
| Diseases of the musculoskeletal system (Chronic)                 | 0       | 0       | 0.0046  | 0.0147  | 0       | 0.0013  | 0.0044  | 0.0031  | 0.0189  |
| Certain conditions originating in the perinatal period (Chronic) | 0.0236  | 0.0333  | 0.012   | -0.003  | 0.0185  | 0.0096  | 0.0261  | 0.0233  | -0.0049 |
| Injury and poisoning (Chronic)                                   | 0       | 0       | 0.0027  | 0.0078  | 0.0042  | 0.0311  | -0.0105 | 0.0121  | -0.0037 |

**Table 17: Standardized Differences for Covariates in NY Pyloromyotomy Matched Cohorts by Age at Exposure**

|                                                                | >Birth -<br>≤28 days | >28 days -<br>≤6 months |
|----------------------------------------------------------------|----------------------|-------------------------|
| Sex                                                            | -0.0023              | -0.0166                 |
| Race                                                           | 0.0118               | 0.0152                  |
| Income Based on ZIP Code of Residence (quartile)               | 0.0086               | 0.0283                  |
| Number of Outpatient Visits (quartile)                         | 0.0218               | 0.0182                  |
| Total Number of Inpatient Stays (n)                            | -0.0116              | 0.0043                  |
| <36 Weeks Gestational Age                                      | -0.0038              | 0.0237                  |
| Low Birth Weight (<2500g and ≥1500g)                           | -0.0062              | 0.0129                  |
| Very Low Birth Weight (<1500g and ≥1000g)                      | 0                    | 0.0154                  |
| Extremely Low Birth Weight (<1000g)                            | 0                    | 0.0196                  |
| Chromosomal Anomalies                                          | 0                    | 0                       |
| Congenital Anomalies of the Heart and Circulatory System       | -0.0019              | -0.023                  |
| Congenital Anomalies of the Central Nervous System             | -0.0037              | -0.0113                 |
| Congenital Anomalies of the Eye                                | 0.009                | 0.0449                  |
| Congenital Anomalies of the Genital Organs                     | 0.0158               | 0.0146                  |
| Congenital Anomalies of the Digestive System                   | -0.0137              | 0.0401                  |
| Congenital Musculoskeletal Deformities                         | 0.0263               | 0.0351                  |
| Other Congenital Anomalies                                     | 0                    | 0.0253                  |
| Congenital Anomalies of the Respiratory System                 | 0                    | 0.0239                  |
| Congenital Anomalies of the Skin                               | -0.0034              | 0.0033                  |
| Congenital Anomalies of the Urinary System                     | 0.0054               | 0                       |
| Intrauterine Hypoxia                                           | -0.0101              | 0.0227                  |
| Intrauterine Exposure to Noxious Agent                         | -0.0154              | 0                       |
| Intrauterine Placental Insufficiency                           | 0.0058               | -0.0058                 |
| Infectious Disease (Acute)                                     | -0.0216              | -0.0195                 |
| Neoplasm (Acute)                                               | 0                    | 0                       |
| Endocrine, metabolic, and immunity disorders (Acute)           | 0.0268               | 0.0309                  |
| Diseases of blood and blood-forming organs (Acute)             | 0                    | -0.0113                 |
| Diseases of the nervous system and sense organs (Acute)        | -0.0032              | 0.0192                  |
| Diseases of the circulatory system (Acute)                     | 0.0268               | 0                       |
| Diseases of the respiratory system (Acute)                     | -0.0152              | 0.0107                  |
| Diseases of the digestive system (Acute)                       | -0.0137              | -0.0112                 |
| Diseases of the genitourinary system (Acute)                   | 0.0253               | 0.0117                  |
| Diseases of the skin and subcutaneous tissue (Acute)           | 0.0033               | 0.0079                  |
| Diseases of the musculoskeletal system (Acute)                 | -0.0025              | 0.021                   |
| Congenital anomalies                                           | 0.0031               | 0.0048                  |
| Certain conditions originating in the perinatal period (Acute) | -0.0006              | -0.0084                 |
| Injury and poisoning (Acute)                                   | 0                    | -0.0043                 |
| Infectious Disease (Chronic)                                   | 0                    | 0                       |
| Neoplasm (Chronic)                                             | 0                    | 0                       |



|                                                                  |         |         |
|------------------------------------------------------------------|---------|---------|
| Endocrine, metabolic, and immunity disorders (Chronic)           | 0.0462  | 0.0369  |
| Diseases of blood and blood-forming organs (Chronic)             | -0.0253 | 0.0065  |
| Diseases of the nervous system and sense organs (Chronic)        | 0.0025  | 0.0362  |
| Diseases of the circulatory system (Chronic)                     | 0.053   | -0.0133 |
| Diseases of the respiratory system (Chronic)                     | 0.0079  | 0.034   |
| Diseases of the digestive system (Chronic)                       | -0.0053 | 0.0012  |
| Diseases of the genitourinary system (Chronic)                   | 0.0167  | 0.0253  |
| Diseases of the skin and subcutaneous tissue (Chronic)           | 0       | 0.0105  |
| Diseases of the musculoskeletal system (Chronic)                 | 0       | 0.0139  |
| Certain conditions originating in the perinatal period (Chronic) | 0.0029  | 0.0042  |
| Injury and poisoning (Chronic)                                   | 0       | 0       |



|                                                                  |         |         |         |         |         |         |         |         |         |         |         |
|------------------------------------------------------------------|---------|---------|---------|---------|---------|---------|---------|---------|---------|---------|---------|
| Endocrine, metabolic, and immunity disorders (Chronic)           | -0.0295 | 0.0135  | 0.0422  | 0.0149  | 0.0182  | 0.0326  | 0.0206  | 0.0752  | 0.0346  | -0.0332 | 0.0635  |
| Diseases of blood and blood-forming organs (Chronic)             | 0       | 0.0121  | 0.0119  | 0.0276  | -0.0124 | 0.0274  | -0.0546 | 0.007   | 0       | -0.0102 | 0       |
| Diseases of the nervous system and sense organs (Chronic)        | 0       | 0.0329  | 0.0404  | 0.0559  | 0.0809  | 0.0097  | 0.0944  | 0.0606  | -0.0329 | 0.1558  | 0.0583  |
| Diseases of the circulatory system (Chronic)                     | 0       | 0.0094  | 0.0643  | 0.0495  | -0.0535 | 0.0122  | -0.0195 | 0.0248  | 0.0208  | 0.0436  | -0.0223 |
| Diseases of the respiratory system (Chronic)                     | 0       | -0.001  | 0.0145  | 0.0442  | -0.0112 | -0.0215 | -0.0126 | 0.0536  | 0.0091  | 0.0505  | 0.1157  |
| Diseases of the digestive system (Chronic)                       | 0       | 0.0027  | 0.049   | 0.0035  | 0.0444  | 0.0537  | -0.041  | -0.0501 | 0.1017  | 0.063   | -0.0569 |
| Diseases of the genitourinary system (Chronic)                   | 0       | -0.0027 | 0.0047  | 0.0312  | 0.0468  | -0.0377 | 0.045   | 0.0384  | 0.0447  | 0.0731  | 0       |
| Diseases of the skin and subcutaneous tissue (Chronic)           | 0       | 0.0256  | 0.0248  | 0.0281  | -0.0189 | 0.0299  | 0.0214  | -0.0282 | 0.0357  | 0.0434  | 0.0252  |
| Diseases of the musculoskeletal system (Chronic)                 | 0       | -0.0073 | -0.0167 | -0.0094 | 0       | 0.0335  | 0       | -0.0277 | 0.1032  | 0       | 0       |
| Certain conditions originating in the perinatal period (Chronic) | 0       | -0.006  | -0.009  | 0.0045  | 0.0292  | 0.0325  | 0.0396  | -0.0365 | 0       | 0       | 0       |
| Injury and poisoning (Chronic)                                   | 0       | 0       | 0       | -0.0044 | 0.0157  | -0.0164 | -0.0119 | -0.0398 | 0.0241  | 0.0702  | -0.0879 |

**Table 19: Standardized Differences for Covariates in NY Circumcision Cohorts by Age at Exposure**

|                                                                | >28 days -<br>≤6 months | >6 months -<br>≤1 yr | >1 yr -<br>≤1.5 yrs | >1.5 yrs -<br>≤2 yrs | >2 yrs -<br>≤2.5 yrs | >2.5 yrs -<br>≤3 yrs | >3 yrs -<br>≤3.5 yrs | >3.5 yrs -<br>≤4 yrs | >4 yrs -<br>≤4.5 yrs | >4.5 yrs -<br>≤5 yrs |
|----------------------------------------------------------------|-------------------------|----------------------|---------------------|----------------------|----------------------|----------------------|----------------------|----------------------|----------------------|----------------------|
| Sex                                                            | 0                       | 0                    | 0                   | 0                    | 0                    | 0                    | 0                    | 0                    | 0                    | 0                    |
| Race                                                           | 0.0396                  | 0.0534               | 0.0272              | 0.069                | 0.0932               | 0.0338               | 0.04                 | 0.041                | 0.142                | 0.0898               |
| Income Based on ZIP Code of Residence (quartile)               | 0.0533                  | 0.02                 | 0.0663              | 0.0431               | 0.0971               | 0.0977               | 0.0608               | 0.0528               | 0.0607               | 0.1905               |
| Number of Outpatient Visits (quartile)                         | 0.0204                  | 0.0319               | 0.0167              | 0.0684               | 0.0713               | 0.066                | 0.0228               | 0.0633               | 0.0456               | 0.1066               |
| Total Number of Inpatient Stays (n)                            | 0.0561                  | 0.0381               | 0.0025              | 0.0431               | 0.073                | 0.0809               | 0.0185               | 0.0279               | 0.0302               | 0.0906               |
| <36 Weeks Gestational Age                                      | 0.0398                  | 0.0256               | 0.0258              | -0.0298              | 0.0025               | -0.0344              | -0.0074              | 0.024                | 0                    | -0.0133              |
| Low Birth Weight (<2500g and ≥1500g)                           | 0.007                   | -0.0053              | 0.0085              | -0.0482              | 0.0328               | 0.0365               | -0.0508              | 0.0302               | 0.0074               | -0.0161              |
| Very Low Birth Weight (<1500g and ≥1000g)                      | 0.0094                  | 0.0186               | -0.0056             | 0                    | -0.0151              | -0.0561              | -0.0113              | 0.0131               | 0                    | -0.0461              |
| Extremely Low Birth Weight (<1000g)                            | 0.0335                  | 0.0081               | 0.0159              | 0.0326               | -0.0228              | -0.036               | -0.0432              | -0.0171              | -0.0596              | 0                    |
| Chromosomal Anomalies                                          | 0                       | -0.0037              | 0.0168              | 0                    | 0                    | 0                    | 0.0173               | 0                    | 0                    | 0                    |
| Congenital Anomalies of the Heart and Circulatory System       | 0.0142                  | 0.0103               | 0.0062              | 0.0388               | 0.0089               | -0.0717              | -0.0146              | -0.0263              | 0.0558               | 0.0243               |
| Congenital Anomalies of the Central Nervous System             | 0.027                   | -0.0037              | 0                   | 0.0288               | 0                    | 0                    | 0                    | -0.0328              | -0.0168              | 0                    |
| Congenital Anomalies of the Eye                                | -0.0141                 | 0.005                | -0.0107             | -0.015               | 0.0138               | 0.049                | 0                    | -0.0171              | 0                    | 0                    |
| Congenital Anomalies of the Genital Organs                     | -0.0153                 | -0.0126              | 0.001               | 0.063                | 0.0408               | 0                    | -0.0286              | 0.0141               | 0.0394               | -0.022               |
| Congenital Anomalies of the Digestive System                   | 0.0197                  | -0.0245              | 0.0101              | 0.0109               | 0                    | 0                    | 0                    | -0.0328              | 0                    | 0                    |
| Congenital Musculoskeletal Deformities                         | 0.096                   | -0.0198              | 0.0317              | 0                    | -0.011               | 0.0447               | 0                    | 0                    | 0.0324               | 0                    |
| Other Congenital Anomalies                                     | 0                       | -0.0045              | 0                   | 0                    | 0                    | 0                    | 0                    | 0                    | 0                    | 0                    |
| Congenital Anomalies of the Respiratory System                 | 0                       | -0.0072              | -0.0123             | 0                    | 0                    | 0                    | 0                    | 0                    | 0                    | 0                    |
| Congenital Anomalies of the Skin                               | 0.0389                  | 0.0267               | 0.0144              | 0                    | 0.0243               | 0                    | 0.0245               | 0.0415               | -0.034               | 0                    |
| Congenital Anomalies of the Urinary System                     | -0.0112                 | 0.0105               | 0.0336              | 0.0226               | 0.0516               | 0.034                | 0                    | 0                    | 0                    | 0                    |
| Intrauterine Hypoxia                                           | 0.0134                  | -0.0111              | 0.0303              | 0.0096               | 0.0583               | 0                    | 0.0097               | 0.0131               | -0.0457              | 0                    |
| Intrauterine Exposure to Noxious Agent                         | 0.0382                  | 0.0196               | 0.0037              | 0                    | -0.0189              | 0.007                | 0                    | 0.0131               | 0                    | 0                    |
| Intrauterine Placental Insufficiency                           | -0.0232                 | -0.0036              | 0.0278              | 0.0195               | -0.0297              | 0                    | 0                    | -0.0357              | 0.0263               | 0.0279               |
| Infectious Disease (Acute)                                     | 0.0337                  | -0.0076              | 0.0224              | -0.0041              | -0.0588              | -0.0723              | 0.0195               | 0.01                 | 0.0141               | -0.0061              |
| Neoplasm (Acute)                                               | 0.005                   | 0.0143               | 0.0214              | 0                    | 0.0583               | 0.0967               | 0.0209               | 0                    | -0.0421              | -0.0422              |
| Endocrine, metabolic, and immunity disorders (Acute)           | 0.0348                  | -0.0089              | -0.0136             | 0.0405               | 0                    | 0.0533               | 0.0264               | 0.0543               | 0.0422               | 0.0508               |
| Diseases of blood and blood-forming organs (Acute)             | 0.0102                  | -0.0147              | 0.0046              | 0.039                | 0.0391               | 0.1519               | 0.0166               | 0.0301               | 0.0347               | -0.0192              |
| Diseases of the nervous system and sense organs (Acute)        | -0.0445                 | -0.0155              | -0.0037             | -0.033               | 0.0355               | -0.0272              | -0.0491              | -0.0167              | -0.0398              | 0                    |
| Diseases of the circulatory system (Acute)                     | 0.0331                  | 0.0119               | -0.0251             | 0.0226               | 0.0243               | -0.0078              | 0.0173               | 0                    | 0.0909               | 0                    |
| Diseases of the respiratory system (Acute)                     | 0.0195                  | 0.0222               | -0.0133             | -0.0371              | -0.0297              | -0.0149              | 0                    | 0.0518               | -0.0368              | -0.0164              |
| Diseases of the digestive system (Acute)                       | -0.0094                 | 0.0208               | -0.001              | 0.0269               | -0.0375              | -0.0189              | 0.0482               | 0.0614               | 0.0062               | 0.0642               |
| Diseases of the genitourinary system (Acute)                   | 0.0508                  | 0.0422               | 0.0478              | 0.0242               | 0.0285               | 0.0161               | 0.0066               | -0.0327              | 0.0147               | 0                    |
| Diseases of the skin and subcutaneous tissue (Acute)           | -0.0072                 | 0.0042               | -0.0057             | 0.0018               | 0.0111               | 0.0138               | 0.0794               | 0.1524               | 0.0339               | -0.0581              |
| Diseases of the musculoskeletal system (Acute)                 | 0.005                   | 0.0077               | 0.0325              | 0.0143               | 0.0415               | 0.0641               | -0.038               | -0.0062              | 0.0264               | 0.1042               |
| Congenital anomalies                                           | 0.026                   | -0.009               | 0.0097              | 0.0597               | 0.0344               | 0.0364               | 0.0033               | -0.0439              | 0.0299               | 0.073                |
| Certain conditions originating in the perinatal period (Acute) | 0.0219                  | -0.0047              | -0.0074             | -0.01                | 0.0475               | -0.0019              | -0.1042              | 0.0064               | -0.0467              | -0.0421              |
| Injury and poisoning (Acute)                                   | -0.0231                 | -0.0037              | 0.0327              | -0.0697              | 0.0237               | -0.0076              | -0.0108              | -0.0705              | -0.0031              | 0.0579               |
| Infectious Disease (Chronic)                                   | -0.0156                 | 0.0205               | 0.0151              | 0.0203               | 0                    | 0                    | 0                    | 0                    | 0                    | -0.0783              |
| Neoplasm (Chronic)                                             | -0.0081                 | -0.0087              | -0.0076             | 0.0136               | 0                    | 0.0559               | 0                    | 0                    | 0.0394               | -0.0422              |

|                                                                  |         |         |         |         |         |         |         |         |         |         |
|------------------------------------------------------------------|---------|---------|---------|---------|---------|---------|---------|---------|---------|---------|
| Endocrine, metabolic, and immunity disorders (Chronic)           | -0.0085 | 0.0169  | 0.0368  | 0.0157  | 0.0186  | 0.0226  | -0.0053 | -0.0572 | 0.0333  | 0.1678  |
| Diseases of blood and blood-forming organs (Chronic)             | -0.0038 | 0.0165  | 0.0269  | 0.0502  | -0.0044 | 0.0216  | 0.0245  | -0.0124 | 0.1212  | 0       |
| Diseases of the nervous system and sense organs (Chronic)        | 0.0129  | -0.0074 | 0.0218  | -0.0161 | 0.0495  | 0.0726  | -0.0335 | 0.0225  | 0.0086  | 0.073   |
| Diseases of the circulatory system (Chronic)                     | 0.0365  | 0.0026  | 0.0329  | -0.0395 | 0.0074  | 0.0128  | 0       | 0.0092  | 0.0631  | 0       |
| Diseases of the respiratory system (Chronic)                     | 0.0428  | -0.0105 | -0.0112 | 0.0064  | -0.0181 | 0.0133  | -0.0244 | 0.0129  | 0.0622  | 0.1018  |
| Diseases of the digestive system (Chronic)                       | 0.0217  | 0.0245  | -0.0047 | 0.0449  | 0.0127  | 0.0555  | -0.0068 | -0.0508 | 0.0048  | 0.0948  |
| Diseases of the genitourinary system (Chronic)                   | 0.0183  | 0.0202  | 0.0451  | 0.0063  | 0.0527  | -0.0073 | -0.0046 | 0.0167  | 0.0382  | 0.0216  |
| Diseases of the skin and subcutaneous tissue (Chronic)           | -0.0029 | -0.0027 | 0.028   | 0.0041  | -0.0256 | 0.0119  | 0.0291  | -0.0065 | 0.0124  | -0.0398 |
| Diseases of the musculoskeletal system (Chronic)                 | 0       | 0.0251  | 0.0301  | -0.0198 | 0.0308  | 0.0315  | 0       | -0.0473 | -0.0122 | 0       |
| Certain conditions originating in the perinatal period (Chronic) | 0.0272  | 0.0206  | 0.004   | 0.0076  | -0.0227 | 0.0164  | -0.0156 | 0.0131  | 0       | 0       |
| Injury and poisoning (Chronic)                                   | 0       | 0.025   | -0.005  | -0.0089 | 0.0121  | 0.0368  | 0       | -0.0574 | -0.0284 | -0.0314 |

**Table 20: Standardized Differences for Covariates in NY Tonsillectomy and/or Adenoidectomy Cohorts by Age at Exposure**

|                                                                | >6 months -<br>≤1 yr | >1 yr -<br>≤1.5 yrs | >1.5 yrs -<br>≤2 yrs | >2 yrs -<br>≤2.5 yrs | >2.5 yrs -<br>≤3 yrs | >3 yrs -<br>≤3.5 yrs | >3.5 yrs -<br>≤4 yrs | >4 yrs -<br>≤4.5 yrs | >4.5 yrs -<br>≤5 yrs |
|----------------------------------------------------------------|----------------------|---------------------|----------------------|----------------------|----------------------|----------------------|----------------------|----------------------|----------------------|
| Sex                                                            | -0.0598              | -0.0225             | 0.0204               | -0.0211              | -0.0107              | -0.0191              | 0.0013               | 0.0305               | 0.0012               |
| Race                                                           | 0.116                | 0.0694              | 0.0399               | 0.0203               | 0.0265               | 0.0341               | 0.0096               | 0.029                | 0.0248               |
| Income Based on ZIP Code of Residence (quartile)               | 0.1733               | 0.0736              | 0.0517               | 0.022                | 0.0381               | 0.0234               | 0.0358               | 0.0315               | 0.0203               |
| Number of Outpatient Visits (quartile)                         | 0.0528               | 0.0515              | 0.0422               | 0.0401               | 0.0305               | 0.0597               | 0.0329               | 0.017                | 0.0376               |
| Total Number of Inpatient Stays (n)                            | 0.037                | 0.0085              | 0.046                | 0.0212               | 0.0533               | 0.049                | 0.039                | 0.0272               | 0.032                |
| <36 Weeks Gestational Age                                      | -0.0166              | 0.0367              | 0.0131               | 0.0019               | 0.0432               | 0.0169               | 0.0009               | 0.0187               | 0.0188               |
| Low Birth Weight (<2500g and ≥1500g)                           | -0.0483              | 0.0347              | 0.0278               | 0.0245               | 0.0265               | -0.0029              | -0.0065              | 0.006                | 0.0118               |
| Very Low Birth Weight (<1500g and ≥1000g)                      | 0.0449               | 0.0056              | -0.0071              | 0                    | 0.0033               | -0.007               | 0.0022               | 0.0021               | 0                    |
| Extremely Low Birth Weight (<1000g)                            | 0                    | 0.0343              | 0.0139               | 0.0172               | 0.0266               | 0.0031               | 0.0027               | -0.0034              | -0.0147              |
| Chromosomal Anomalies                                          | 0                    | 0                   | -0.0085              | 0.008                | 0.0162               | 0.0051               | 0.0078               | 0                    | -0.0073              |
| Congenital Anomalies of the Heart and Circulatory System       | -0.0662              | 0.0303              | 0.0167               | 0.0071               | 0.0015               | 0.019                | 0.0013               | 0.0245               | 0.0357               |
| Congenital Anomalies of the Central Nervous System             | -0.1085              | 0                   | 0                    | -0.0172              | 0                    | 0.0092               | 0                    | 0.022                | 0.0177               |
| Congenital Anomalies of the Eye                                | -0.0139              | -0.0107             | -0.012               | 0.0124               | 0.0199               | 0.0246               | 0.029                | -0.0177              | 0.0297               |
| Congenital Anomalies of the Genital Organs                     | 0                    | 0.0049              | 0.0069               | 0.0061               | -0.0057              | 0.0115               | 0                    | 0                    | 0.0035               |
| Congenital Anomalies of the Digestive System                   | 0.0212               | 0                   | 0.0257               | 0.0068               | -0.0073              | -0.0199              | -0.0296              | 0.016                | 0.0396               |
| Congenital Musculoskeletal Deformities                         | 0                    | 0.02                | 0.0141               | 0.0153               | -0.0377              | -0.0043              | -0.0018              | 0.0052               | 0.0257               |
| Other Congenital Anomalies                                     | 0                    | 0.022               | -0.0199              | 0.007                | 0                    | 0.013                | -0.0219              | 0                    | 0                    |
| Congenital Anomalies of the Respiratory System                 | 0                    | 0.0101              | 0.0271               | -0.0046              | -0.0045              | 0.0063               | -0.0062              | -0.0183              | 0.0243               |
| Congenital Anomalies of the Skin                               | -0.0273              | -0.0253             | -0.0163              | -0.0013              | 0.0469               | 0                    | 0.0188               | 0.014                | 0.0105               |
| Congenital Anomalies of the Urinary System                     | -0.0192              | 0.0303              | 0.0029               | -0.0274              | -0.0168              | -0.0367              | 0.0038               | 0.0347               | -0.0286              |
| Intrauterine Hypoxia                                           | 0                    | -0.0054             | 0                    | 0.0122               | -0.0064              | 0.0128               | 0                    | 0                    | -0.0075              |
| Intrauterine Exposure to Noxious Agent                         | 0.0318               | 0.0166              | -0.0269              | 0.027                | -0.0032              | -0.0127              | 0.0047               | 0.0095               | 0.0414               |
| Intrauterine Placental Insufficiency                           | -0.0823              | -0.0029             | 0.0067               | 0.0134               | 0                    | 0.016                | 0.0094               | 0.0101               | 0                    |
| Infectious Disease (Acute)                                     | 0.0041               | -0.0046             | -0.0095              | -0.0143              | -0.0023              | -0.0104              | -0.0367              | -0.0367              | -0.0263              |
| Neoplasm (Acute)                                               | -0.0336              | -0.0189             | 0.0277               | 0.0578               | 0.0296               | -0.0109              | 0.0055               | -0.0016              | -0.0061              |
| Endocrine, metabolic, and immunity disorders (Acute)           | 0.0954               | 0.0273              | -0.002               | 0.0221               | 0.0172               | 0.031                | 0.0266               | 0.0108               | 0.0227               |
| Diseases of blood and blood-forming organs (Acute)             | -0.0483              | -0.002              | 0.007                | 0.0096               | 0.0293               | 0.0142               | 0.026                | -0.0012              | 0.0339               |
| Diseases of the nervous system and sense organs (Acute)        | -0.0123              | 0.0324              | -0.0091              | -0.0134              | -0.0528              | -0.0176              | -0.0114              | -0.0148              | -0.0034              |
| Diseases of the circulatory system (Acute)                     | 0                    | 0.0056              | -0.011               | 0.0077               | 0.0136               | 0.002                | 0.0289               | -0.006               | 0.0022               |
| Diseases of the respiratory system (Acute)                     | -0.0845              | -0.0044             | -0.0539              | -0.0533              | -0.0138              | -0.0147              | -0.0389              | -0.0011              | -0.0154              |
| Diseases of the digestive system (Acute)                       | 0.0472               | 0.001               | 0.0151               | -0.0232              | 0.003                | -0.0182              | -0.0084              | 0.0179               | -0.0373              |
| Diseases of the genitourinary system (Acute)                   | -0.0749              | 0.0317              | 0.0306               | 0.018                | 0.0089               | 0.0254               | 0.0124               | 0.0079               | -0.0007              |
| Diseases of the skin and subcutaneous tissue (Acute)           | -0.076               | 0.0224              | 0.0041               | 0.0225               | -0.0171              | -0.0151              | -0.0004              | 0.015                | -0.0082              |
| Diseases of the musculoskeletal system (Acute)                 | 0.0318               | 0.0124              | 0.0072               | 0.0567               | 0.0277               | 0.008                | 0.0134               | 0.0356               | 0.0045               |
| Congenital anomalies                                           | -0.0159              | 0.04                | 0.0022               | 0.0333               | 0.0307               | 0.0118               | 0.0355               | 0.0201               | 0.0291               |
| Certain conditions originating in the perinatal period (Acute) | -0.052               | 0.0411              | 0.0417               | 0.0204               | 0.0106               | -0.0011              | -0.0088              | 0.0266               | -0.0006              |
| Injury and poisoning (Acute)                                   | 0.0313               | -0.0031             | -0.0025              | 0.0203               | -0.0039              | -0.0193              | 0.0004               | -0.0005              | -0.0221              |
| Infectious Disease (Chronic)                                   | 0                    | 0                   | 0.035                | 0.0239               | 0.0146               | 0.0275               | 0.0068               | 0                    | 0                    |
| Neoplasm (Chronic)                                             | 0                    | 0.0056              | 0.0384               | 0.0039               | 0.0139               | 0                    | 0.0128               | -0.0037              | -0.0027              |

|                                                                  |         |         |         |         |         |         |         |         |         |
|------------------------------------------------------------------|---------|---------|---------|---------|---------|---------|---------|---------|---------|
| Endocrine, metabolic, and immunity disorders (Chronic)           | 0.0146  | 0.0403  | -0.0098 | 0.0285  | 0.0285  | -0.0144 | -0.0018 | 0.0183  | 0       |
| Diseases of blood and blood-forming organs (Chronic)             | 0.0212  | -0.0187 | 0.0238  | 0.0054  | 0.0263  | 0.0068  | 0.0212  | 0.0387  | 0.0069  |
| Diseases of the nervous system and sense organs (Chronic)        | -0.0419 | -0.0179 | 0       | 0.0263  | 0.0275  | 0.011   | 0.0327  | 0.0193  | -0.0049 |
| Diseases of the circulatory system (Chronic)                     | -0.0192 | -0.0025 | 0.0151  | 0.0176  | 0.0333  | 0.0051  | -0.0046 | 0.014   | 0.0084  |
| Diseases of the respiratory system (Chronic)                     | -0.0161 | 0.0101  | 0.004   | -0.0297 | -0.0034 | 0.0102  | -0.0085 | -0.0068 | 0.0096  |
| Diseases of the digestive system (Chronic)                       | -0.0214 | 0.0468  | 0.0186  | 0.0106  | 0.0241  | 0.0326  | 0.0046  | 0.0286  | 0.0402  |
| Diseases of the genitourinary system (Chronic)                   | 0       | -0.0043 | 0.0049  | 0.0191  | 0.0126  | 0.021   | 0.0278  | 0.0061  | 0.0072  |
| Diseases of the skin and subcutaneous tissue (Chronic)           | -0.0483 | -0.0501 | -0.015  | 0.0021  | 0.0014  | 0.0344  | 0       | 0.0082  | 0.0424  |
| Diseases of the musculoskeletal system (Chronic)                 | 0.0212  | 0.0098  | 0.0269  | -0.0044 | 0.0181  | 0.0207  | 0.0121  | 0.0035  | 0.0219  |
| Certain conditions originating in the perinatal period (Chronic) | 0.037   | 0.0132  | -0.0223 | 0.028   | 0.0206  | 0.0096  | 0.0154  | 0.0181  | 0.0477  |
| Injury and poisoning (Chronic)                                   | 0       | 0.0371  | 0.0049  | 0.0075  | 0.0245  | -0.0101 | 0.0181  | -0.0127 | 0.0045  |

**References:**

1. IRS. SOI Tax Stats - Individual Income Tax Statistics - ZIP Code Data (SOI). 2010;  
<https://www.irs.gov/uac/soi-tax-stats-individual-income-tax-statistics-zip-code-data-soi>, 2014.
2. Healthcare Cost and Utilization Project (HCUP) Chronic Condition Indicator (CCI) for ICD-9-CM.  
<https://www.hcup-us.ahrq.gov/toolssoftware/chronic/chronic.jsp>, 2015.
3. DiMaggio C, Sun LS, Li G. Early childhood exposure to anesthesia and risk of developmental and behavioral disorders in a sibling birth cohort. *Anesth Analg*. 2011;113(5):1143-1151.
